# Supplementary material for: Comparative genomics using teleost fish helps to systematically identify target gene bodies of functionally defined human enhancers
Source: PubMed Central journal article supplement (PMC3599049; doi:10.1186/1471-2164-14-122), 2013-02-23
Supplement: 1471-2164-14-122-S2.pdf [file 1471-2164-14-122-S2.pdf]

A

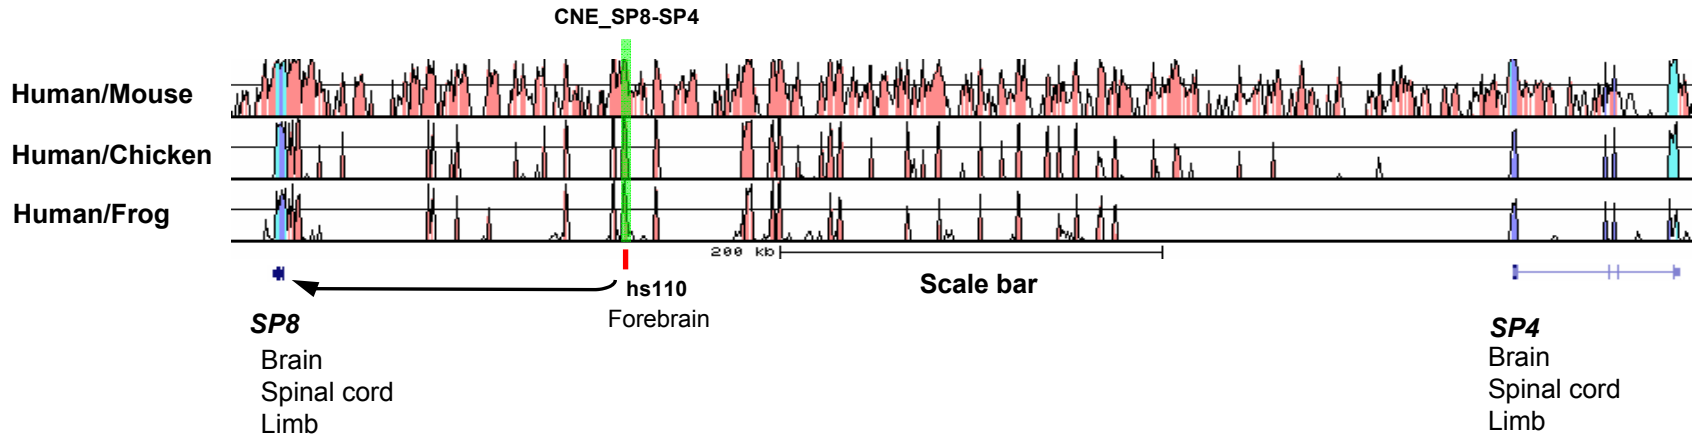

B

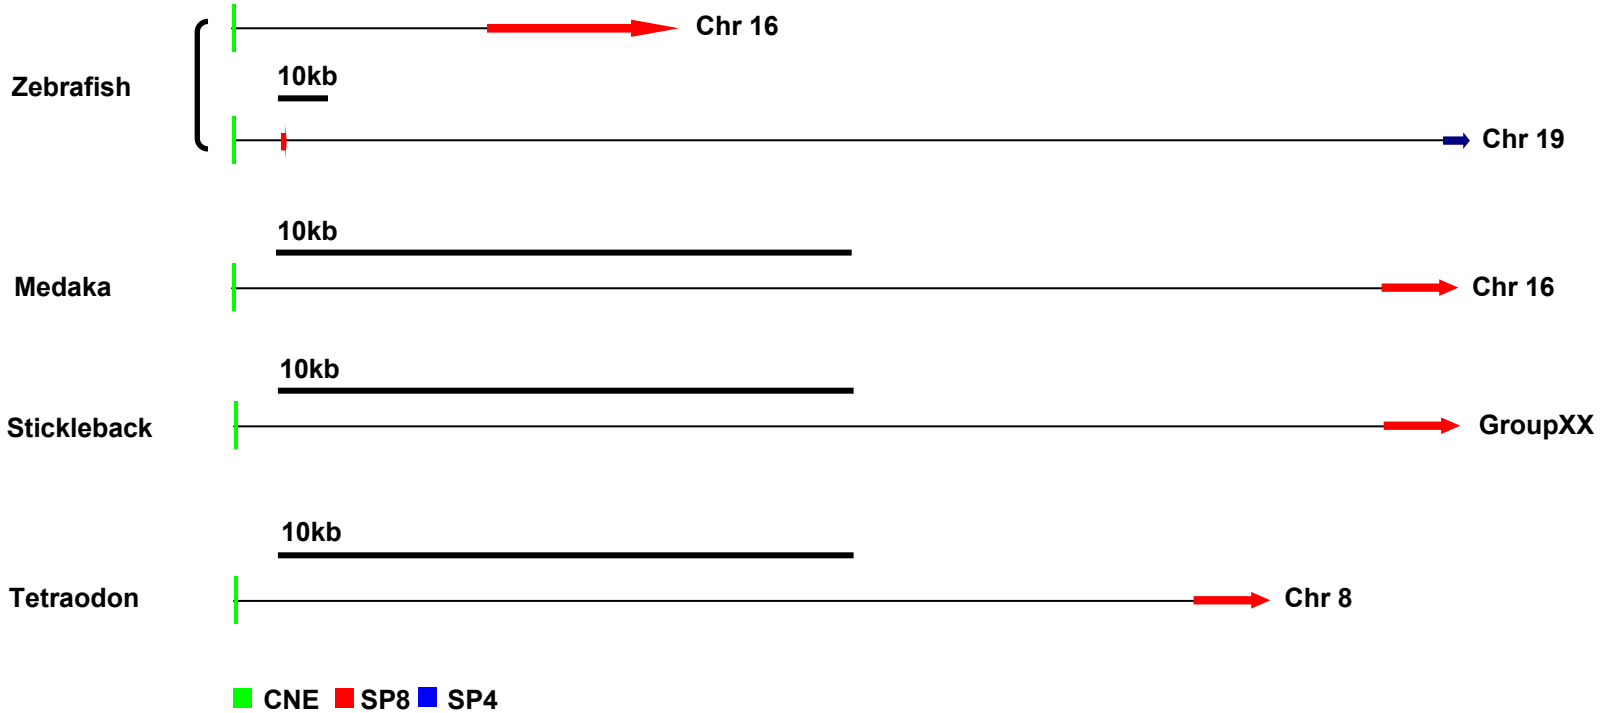

**Figure 1. Target gene identification of human CNE-enhancers through orthology mapping (hs110).**

Extreme evolutionary conservation and spatio-temporal expression analysis of CNEs and their neighboring genes lead to association of CNE enhancers to their respective genes. **(A)** Comparative syntenic analysis of human and amphibian depicts the conservation of both the paralogs *SP4* (blue) and *SP8* (purple) in the nearest vicinity of the CNE (green). Analogy in the expression pattern of the CNE and both of these paralogs suggest the association of this CNE with both *SP4* and *SP8* gene. **(B)** When we increased the depth of our syntenic comparison up till the fishes it became evident that only *SP8* is conserved along with the CNE in fishes proposing it as a target gene for hs110.

**A**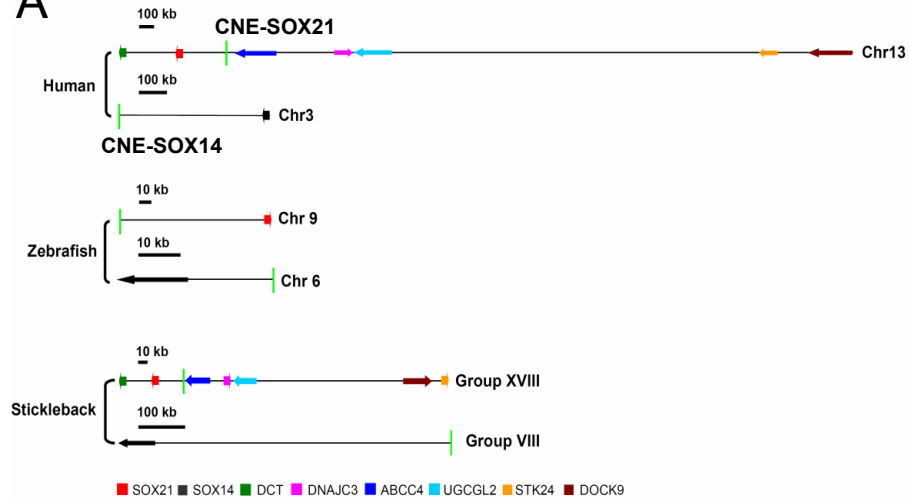**B**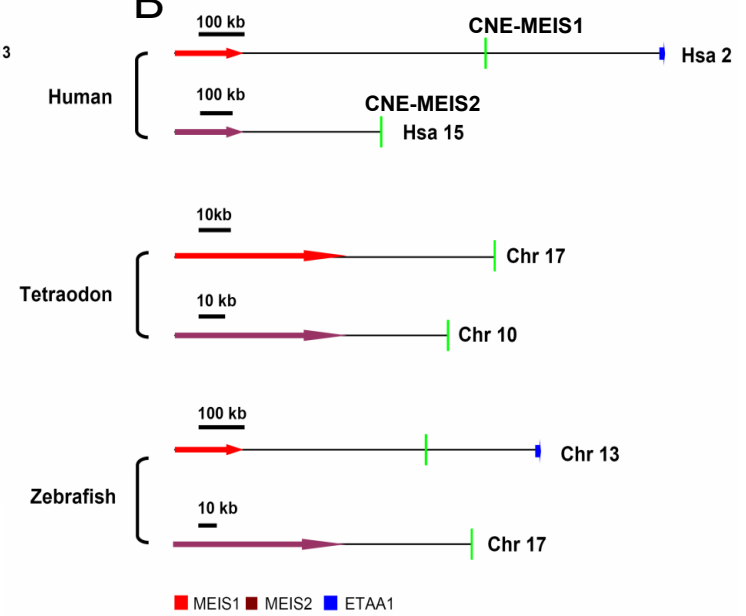**C**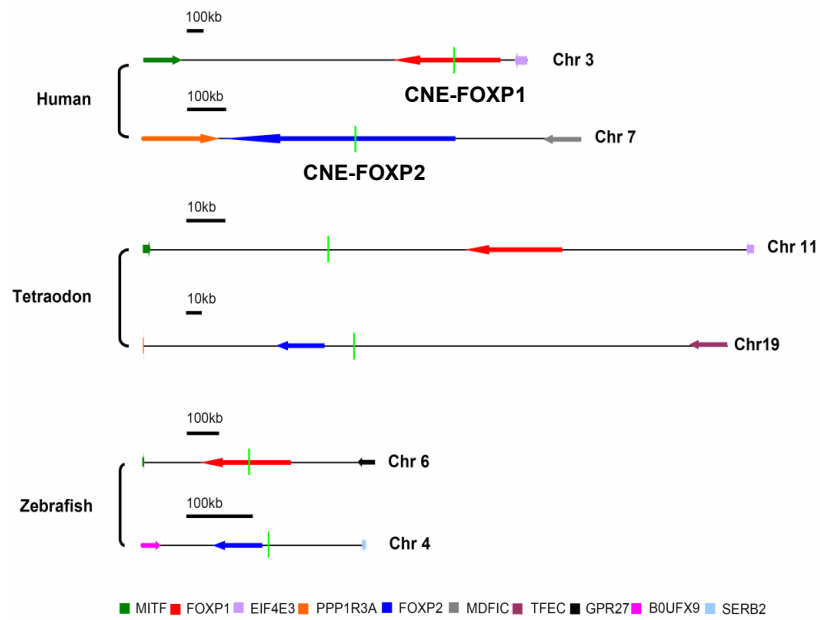

**Figure 2. Predicting the target genes of human enhancers by analyzing their genic environment within and across vertebrate genomes (hs189/hs831/hs187).**

Careful analysis of genomic context of human enhancers helped in establishing an unambiguous association between them and target genes. **(A)** Human enhancer-target gene duplicated early in vertebrate history, before tetrapod-teleost split. Conserved association between duplicated enhancers and *SOX* paralogs indicate that these duplicated human enhancers (*CNE-SOX14* and *CNE-SOX21*) are specific to *SOX14* and *SOX21* genes. **(B)** Duplication of human enhancer at the root of vertebrate lineage and preservation of linkage of duplicated enhancers with *MEIS* family members both within and across genomes, unmistakably suggest the specificity of these duplicated cis-regulatory regions (*CNE-MEIS1* and *CNE-MEIS2*) towards *MEIS1* and *MEIS2* promoters. **(C)** Human *FOXP1* and *FOXP2* paralogs harbor duplicated set of enhancers within their introns. The association of these anciently conserved enhancers with *FOXP1* and *FOXP2* genes is confirmed by their physical proximity to teleost fish orthologs of human *FOXP1* and *FOXP2* genes.

A

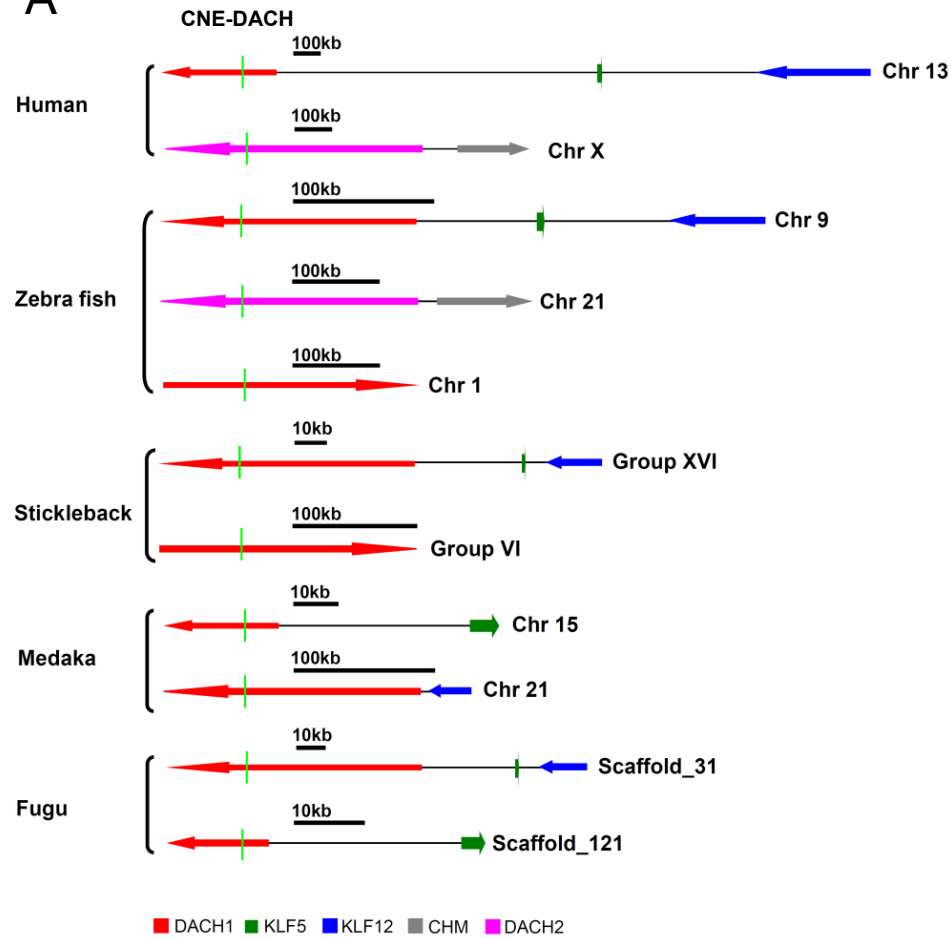

B

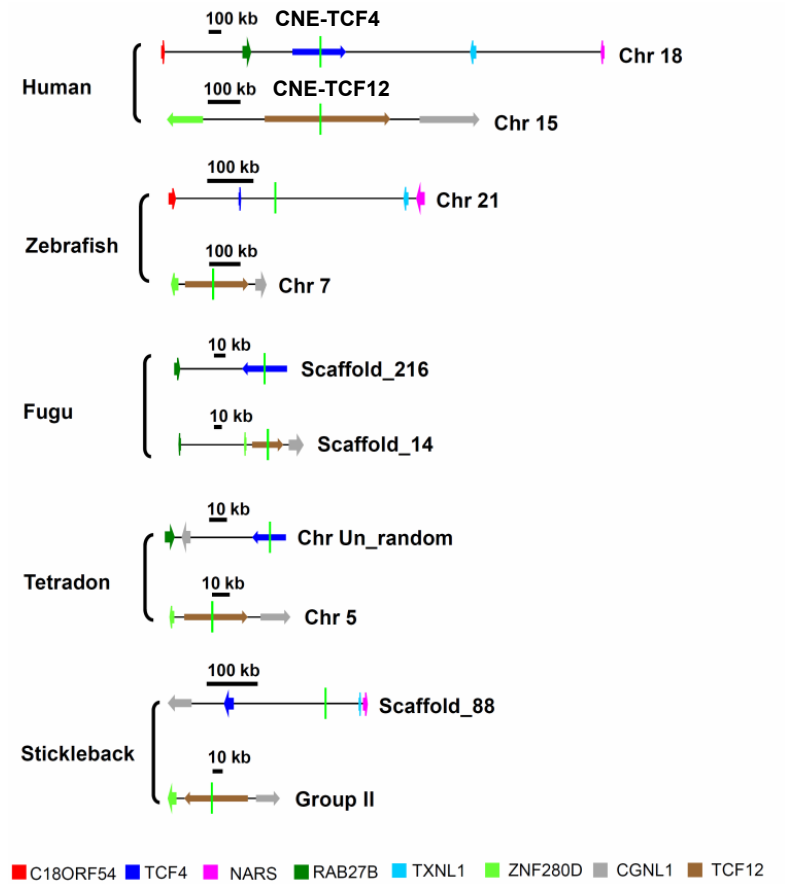

**Figure 3. Target gene identification of human CNE-enhancers through orthology mapping (hs137/hs376).**

Analyzing the genic environment of human CNE-enhancers in teleost fish orthologous loci and expression pattern of reporter gene helps in identifying their target genes. **(A)** Human CNE-enhancer and target gene duplicated before tetrapod-teleost divergence. Comparative syntenic analysis of human duplicated loci in multiple fish lineages clearly suggest that these duplicated human enhancers are associated with the regulation of human *DACH* paralogs residing on human chromosome 13 and X. **(B)** Duplication of human enhancer at the root of vertebrate lineage and preserved linkage of duplicated enhancers with *TCF* family members both within and across genomes, suggest the specificity of these duplicated CNEs towards *TCF4* and *TCF12* human paralogs.

A

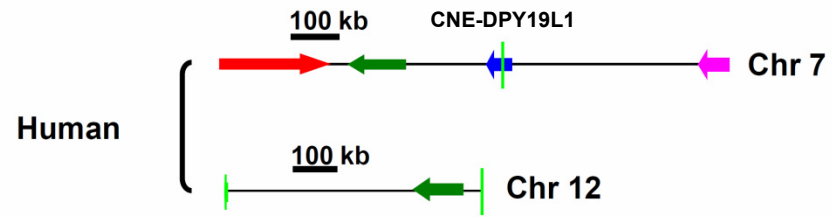

Zebrafish

■ NPSR1 ■ DPY19L1 ■ TBX20 ■ HERPUD2 ■ AVPR1A

B

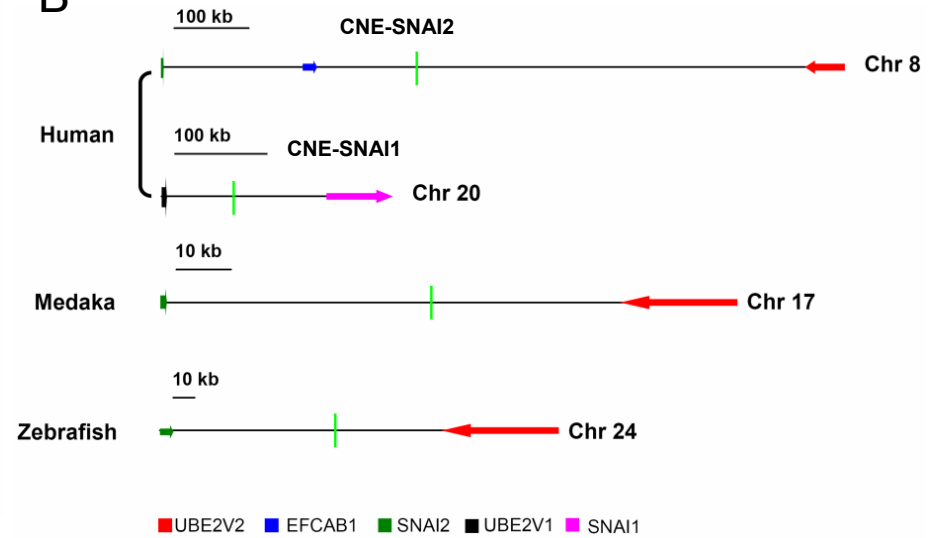

Human

Medaka

Zebrafish

■ UBE2V2 ■ EFCAB1 ■ SNAI2 ■ UBE2V1 ■ SNAI1

**Figure 4. Target gene identification of human CNE-enhancers through orthology mapping (hs466 /mm466).**

Comparative analysis help in assigning the CNE enhancer to its target genes. **(A)** The CNE-enhancer duplicated in human lineage. Careful analysis of genic context of orthologous regions of this element in teleost fish and its duplicated paralogous copy on human chromosome suggests the association of this enhancer with *DPY19L1*. **(B)** The localization of a CNE-enhancer in the intergenic space between *UBE2V2* and *EFCABI* on human chromosome 8 suggest that this enhancer might be associated with one of these genes but not with *SNAIL1* that is present ~ 200 kb upstream of *EFCABI*. However the careful analysis of genic context of orthologous regions of this element in teleost fish and its duplicated paralogous copy on human chromosome 20 clearly indicates that these duplicated human enhancers (*CNE\_SNAIL1* and *CNE\_SNAIL2*) are associated with the regulation of human *SNAI* paralogs.



**A**

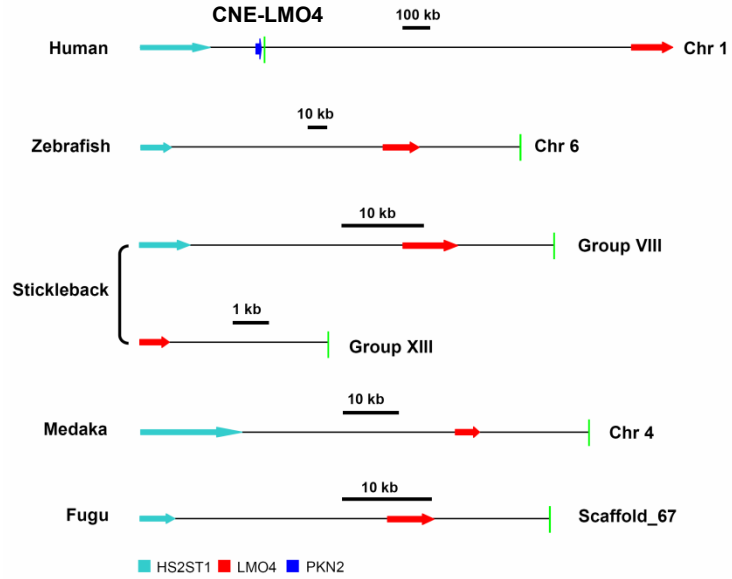

**B**

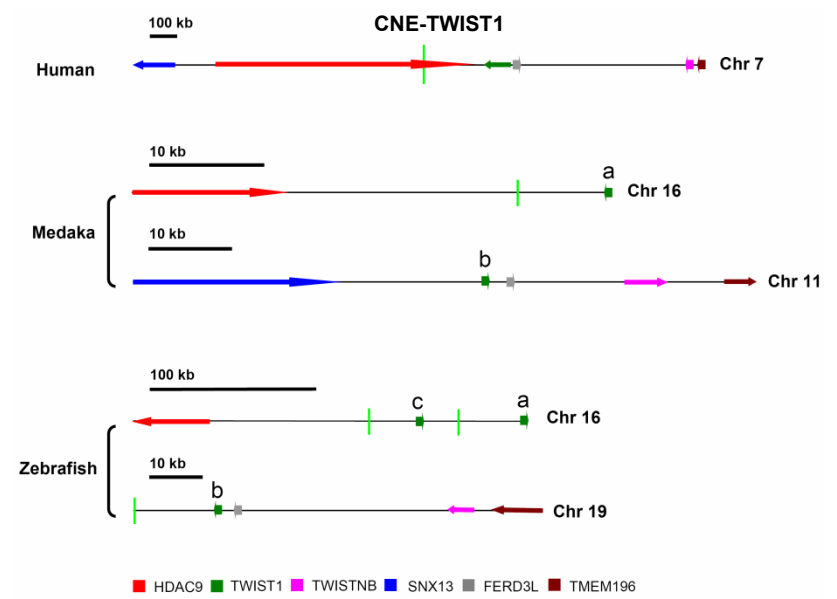

**C**

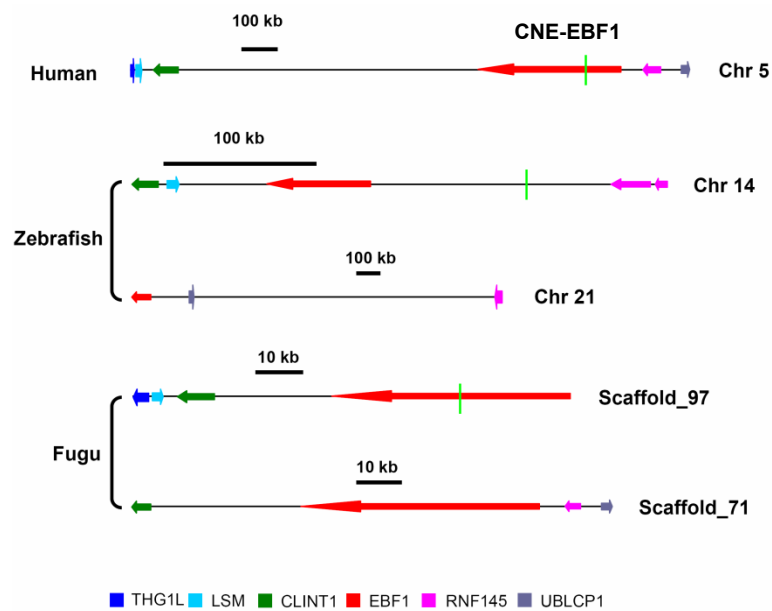

**D**

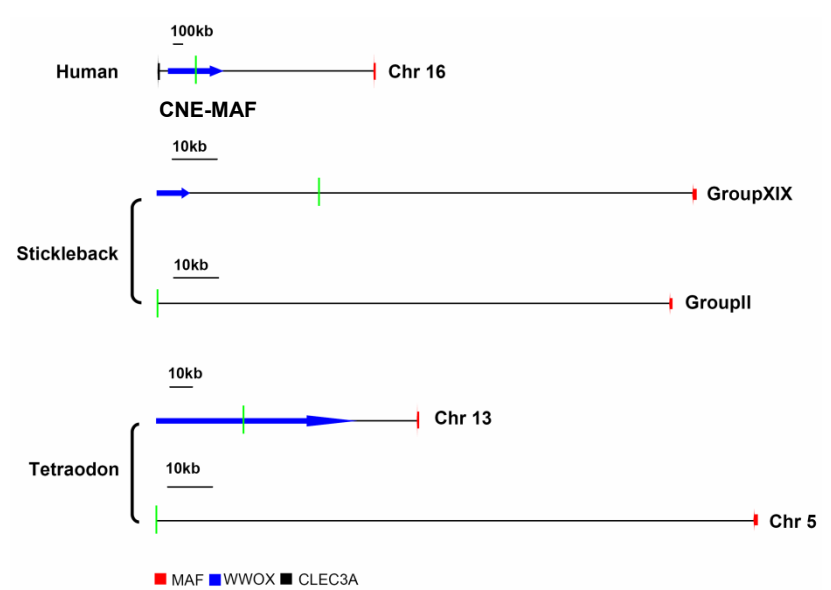

**Figure 5. Target gene identification of human CNE-enhancers through orthology mapping (hs174/hs644/hs1022 /hs12 ) .**

Human CNE-enhancers by tracing the genic context of their orthologous copies in teleost fish lineage. **(A)** Human cis-regulatory element positioned in the intergenic space between *PKN2* and *LMO4*, suggesting that this enhancer might be associated with one of these genes. Examining the neighboring genes of this enhancer in teleost fish suggest that *PKN2* is a bystander gene because in all teleost fish analyzed this gene is physically uncoupled from CNE enhancer. Another gene *HS2ST1* present in the neighborhood of human CNE-enhancer (upstream of *PKN2*) is similarly linked to this enhancer in all teleost fish analyzed. However the duplication of this locus in stickleback indicated that this gene is also a bystander gene as in one of the duplicated fragment (on Group XIII) *HS2ST1* ortholog is lost. The only gene in the human locus that preserved its association with this CNE-enhancer in all teleost fish analyzed (even in duplicated loci of stickleback) is *LMO4*. Therefore human cis-regulatory element positioned in the intergenic space between *PKN2* and *LMO4* is unambiguously associated with *LMO4* and named *CNE-LMO4*. **(B)** Human CNE-enhancer positioned within the intronic interval of *HDAC9* gene on chromosome 7. Approximately 2 Mb of human locus encompassing this enhancer (containing at least 6 genes) was analyzed for the maintenance of conserved gene contents in teleost fish. The locus appeared to be duplicated in medaka and zebrafish. The differential gene loss from teleost duplicated loci suggest that CNE-enhancer within intragenic interval of human *HDAC9* gene is associated with the regulation of *TWIST1*. It is noteworthy that in zebrafish in addition to locus duplication event an independent gene duplication event occurred that produced two tandem copies of *TWIST1* and associated *CNE-TWIST1*. **(C)** Human CNE-enhancer positioned within the intronic interval of *EBF1* gene on chromosome 5. Comparative analysis of this locus in teleost fish revealed that genomic interval encompassing this conserved enhancer is duplicated in zebrafish and Fugu. It appeared that after duplication of the locus, one copy of this CNE-enhancer had been lost in both fishes. Tracing the correlation between gene loss-enhancer loss/gene retention-enhancer retention in fish duplicated loci suggest that CNE-enhancer within the intragenic interval of human *EBF1* might be associated with the regulation *EBF1* gene. **(D)** Comparative analysis of a genic context around a CNE-enhancer within the intronic interval of human *WWOX* suggest that this enhancer act at a distance of ~ 2Mb on *MAF* gene.

**A**

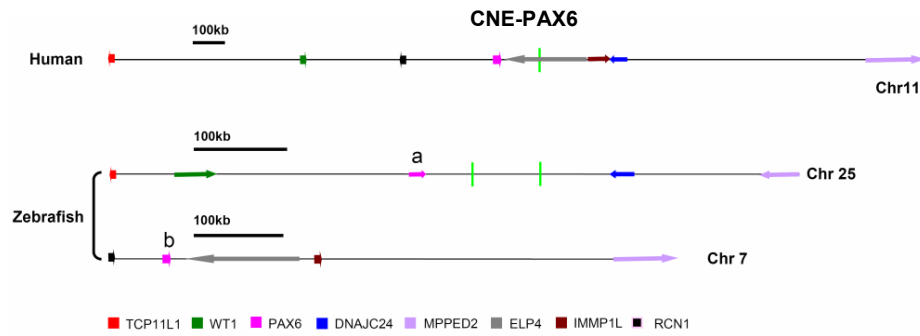

**B**

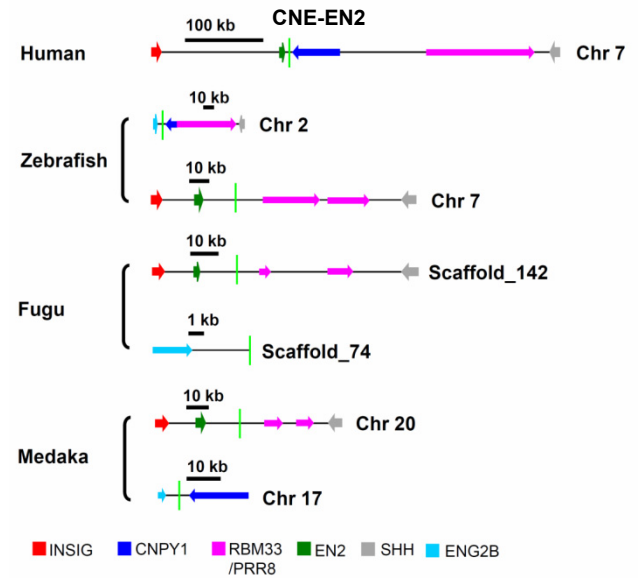

**C**

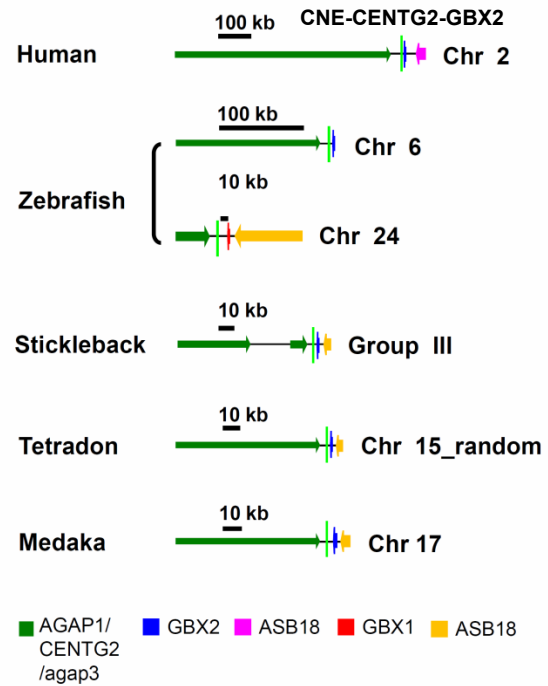

**Figure 6. Target gene identification of human CNE-enhancers through orthology mapping (hs234/hs1418 /hs249) .**

Analysis of genic environment of human CNE-enhancers in teleost fish orthologous genomic intervals helps in identifying their target genes. **(A)** CNE-enhancer within an intron of human *ELP4* gene is associated with neighboring *PAX6* gene. **(B)** Human CNE-enhancer positioned on chromosome 7 probably duplicated in the common ancestor of teleost fish. Comparative syntenic analysis of human locus in multiple fish lineages and redundancy in the CNE induced reporter expression pattern and endogenous expression pattern of *EN2* clearly suggest that this CNE enhancer is associated with the regulation of human *EN2*. **(C)** Conserved positioning of CNE-enhancer within an intergenic space between human *CENTG2* and *GBX2* and all other fish lineages and expression pattern studies suggest that this CNE is associated with either of flanking genes.

A

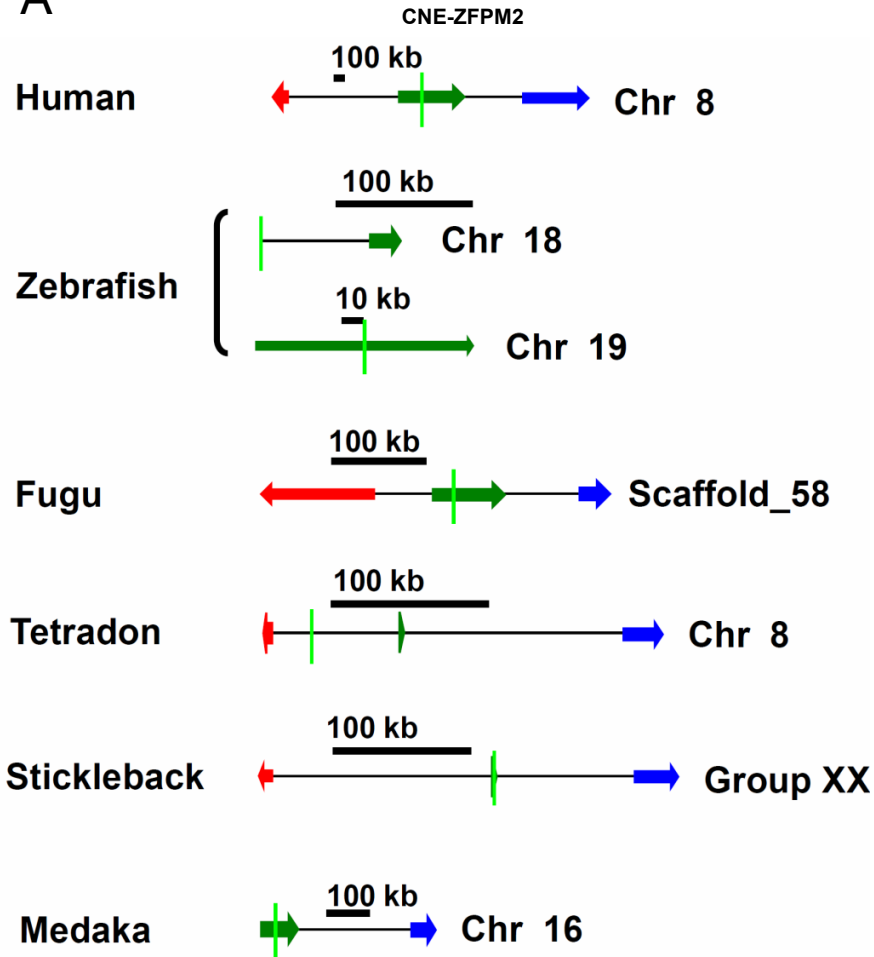

■ DPYS ■ ZFPM2 ■ OXR1

B

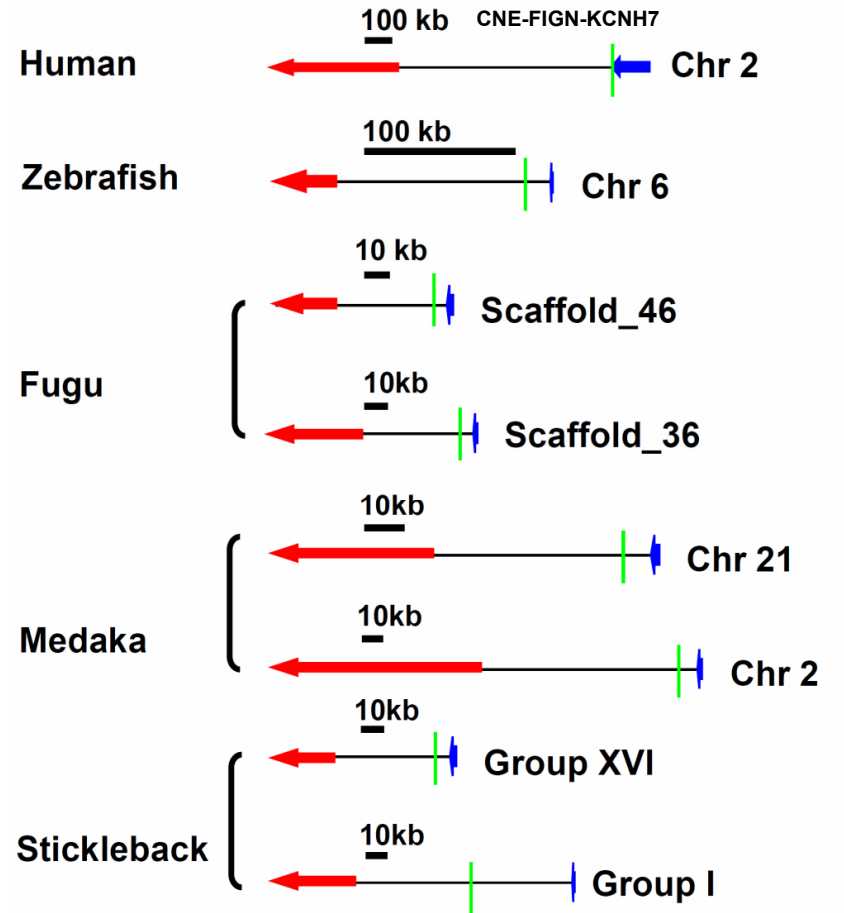

■ KCNH7 ■ FIGN

**Figure 7. Target gene identification of human CNE-enhancers through orthology mapping (hs195/hs170) .**

Assigning the target genes to CNE-enhancers through comparative genomic analysis. **(A)** Human CNE-enhancer is positioned within the intronic interval of *ZFPM2* gene on chromosome 8. Comparative analysis of this locus in teleost fish revealed that genomic interval encompassing this conserved enhancer is duplicated in zebrafish. The conserved linkage of CNE with *ZFPM2* in all lineages and its endogenous expression unmistakably links this CNE with the regulation of *ZFPM2* gene. **(B)** Human CNE enhancer positioned on chromosome 2 duplicated in the common ancestor of teleost fish. Human-fish conserved positioning of CNE-enhancer within an intergenic space between human *FIGN* and *KCNH7* and redundant expression pattern of these two genes suggest the association of this CNE enhancer with either of neighboring genes.

A

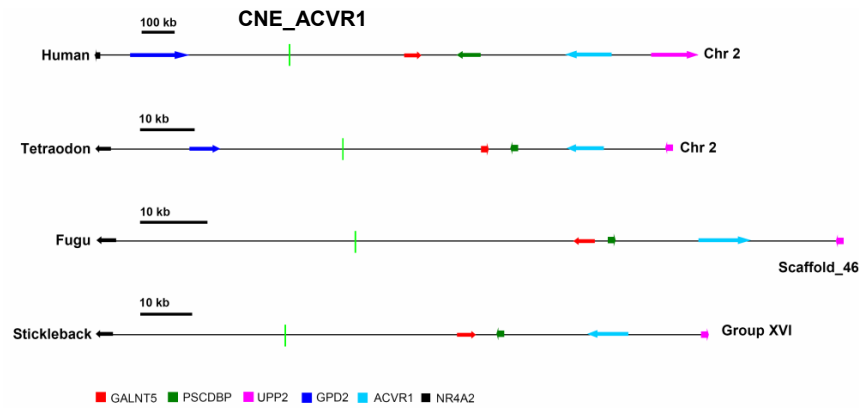

B

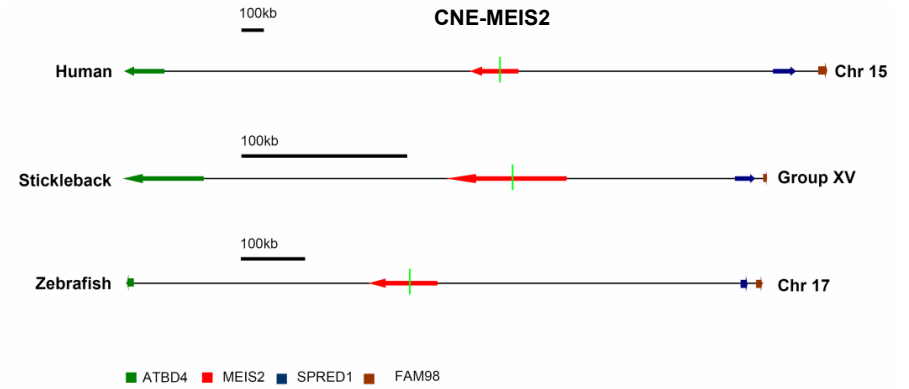

C

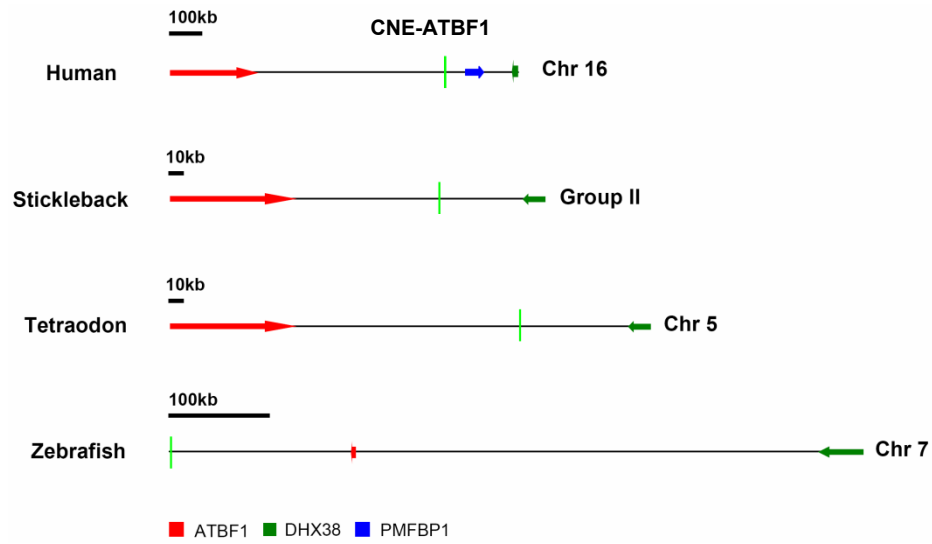

D

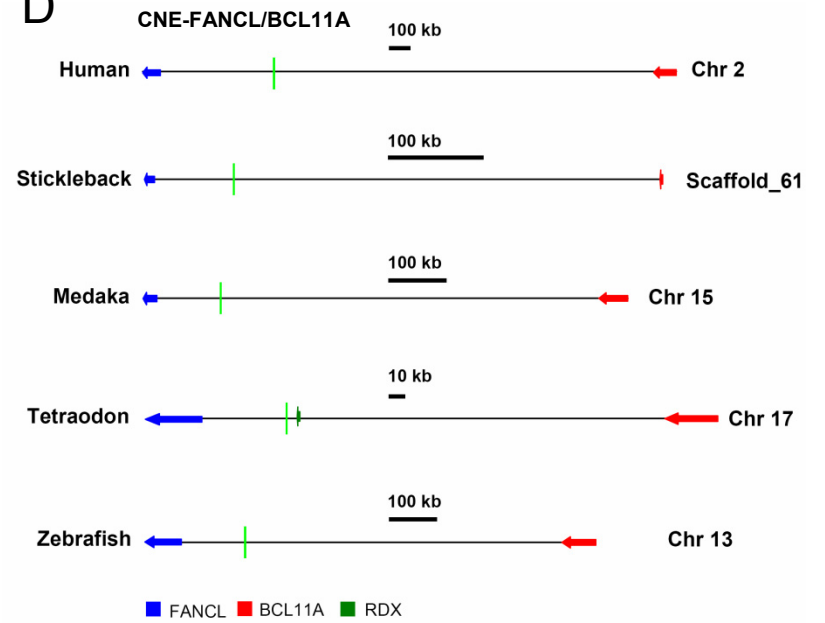

**Figure 8. Target gene identification of human CNE-enhancers through orthology mapping (hs413/hs181/hs22/hs1067).**

Assigning the target genes to CNE-enhancers through comparative genomic analysis. **(A)** CNE-enhancer within an intergenic space between human *GALNT5* and *GPD2* is associated with *ACVRI*. **(B)** CNE-enhancer within an intron of human *MEIS2* gene is associated with the promoter of the same gene. Other human-fish conserved genes within this locus appeared to be bystanders as their expression pattern is unrelated to the activity of this cis-acting region. **(C)** CNE-enhancer within an intergenic space between human *ATBF1* and *PMFBP1* is associated with *ATBF1* gene. **(D)** Human-fish conserved positioning of a CNE-enhancer within an intergenic space between human *FANCL* and *BCL11A* and redundant expression pattern of these two genes suggest that a single enhancer could interact with more than one neighboring genes.



**A**

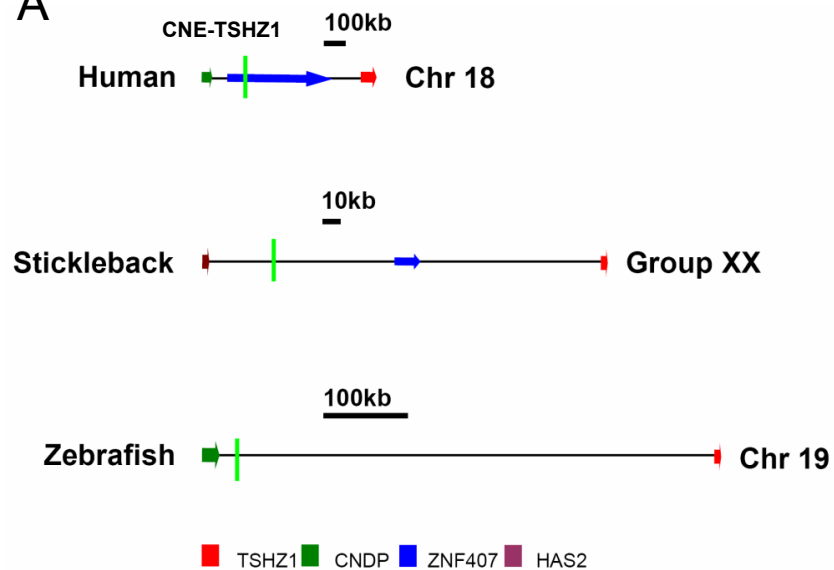

**C**

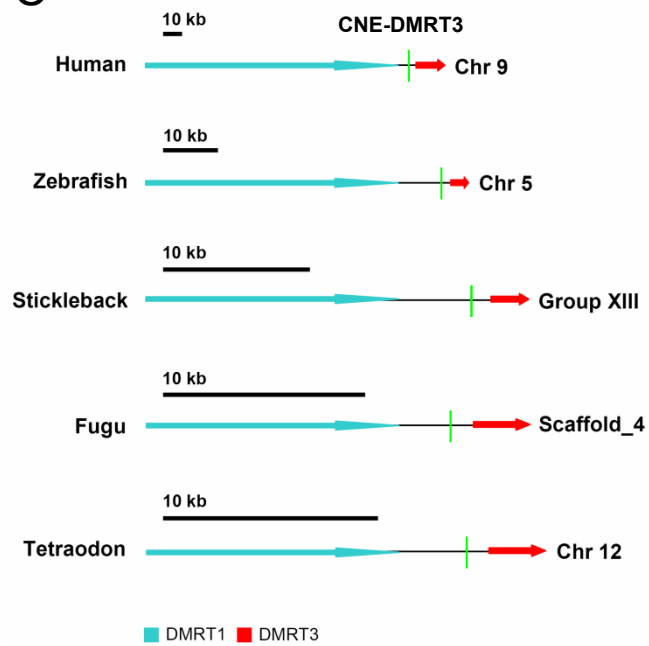

**B**

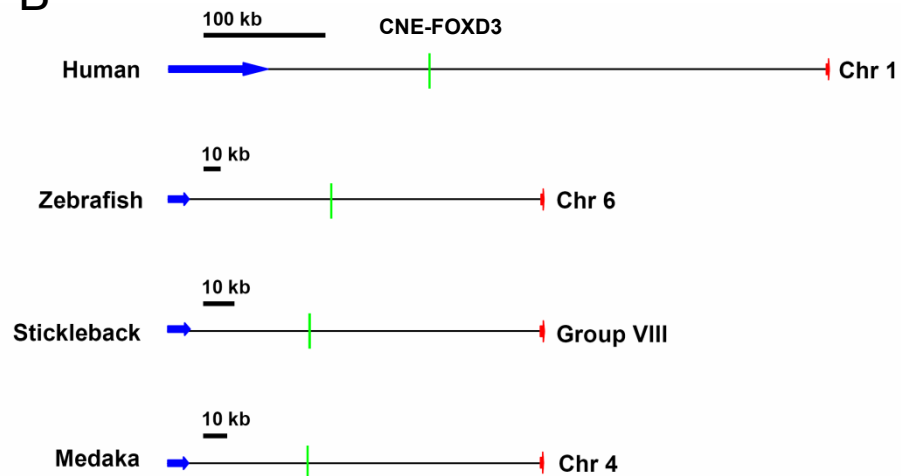

**D**

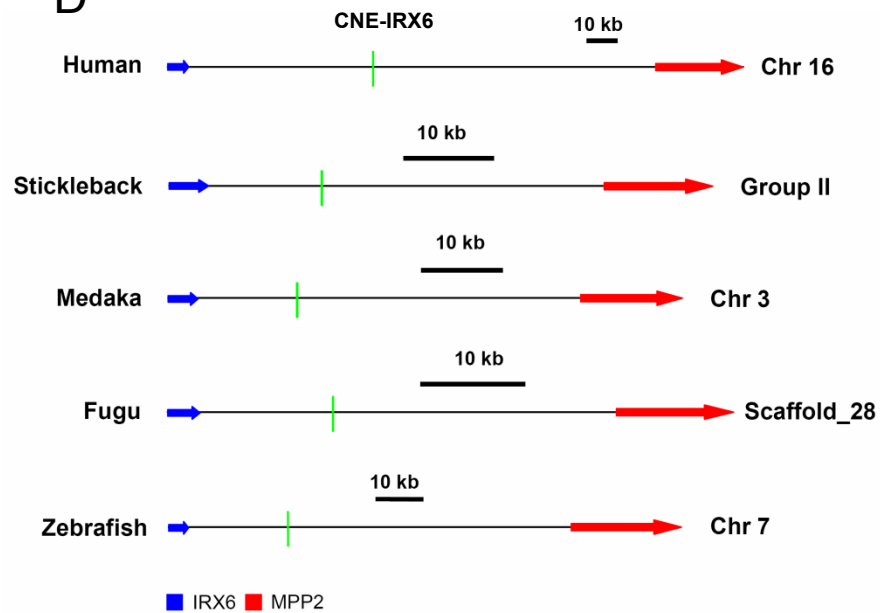

**Figure 9. Target gene identification of human CNE-enhancers through orthology mapping (hs378/hs169/Hs112/hs23).**

Analyzing the genic architecture of human loci in teleost and comparing the reporter expression domains of CNE-enhancers with neighboring genes expression aided in assigning the *cis*-regulatory elements to human **(A)** *TSHZ1* **(B)** *FOXD3* **(C)** *DMRT3* and **(D)** *IRX6* genes.

A

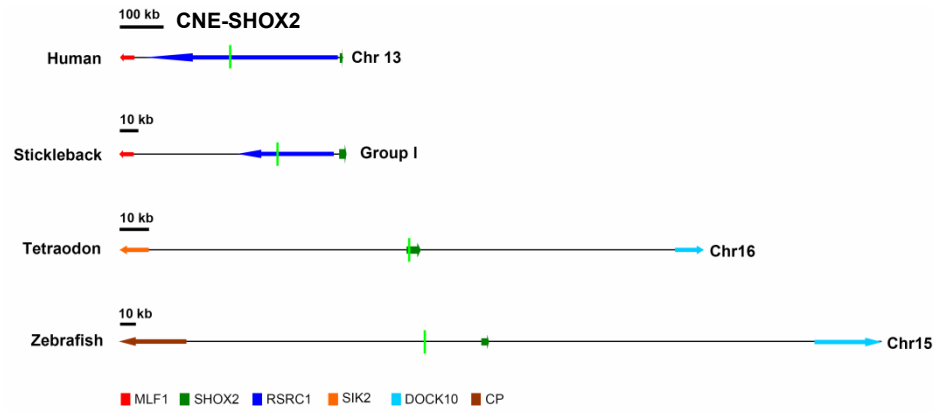

B

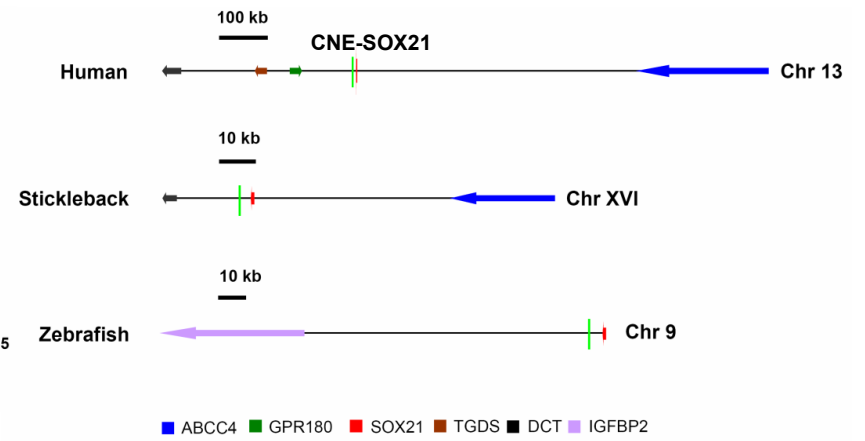

C

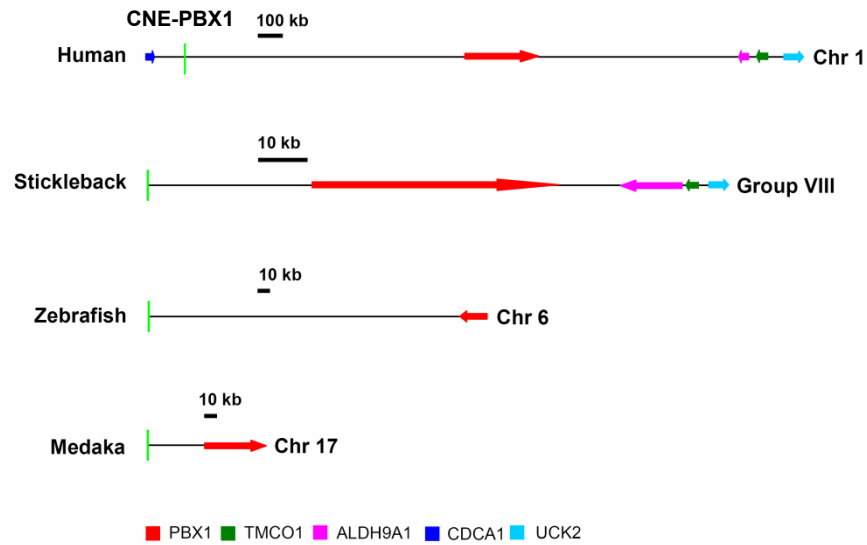

**Figure 10. Target gene identification of human CNE-enhancers through orthology mapping (hs741/hs488/hs762) .**

Analysis of human CNE-enhancers loci in teleost fish orthologous genomic intervals helps in identifying their target genes. **(A)** CNE-enhancer within an intron of human *RSRC1* gene is associated with neighboring *SHOX2*. **(B)** CNE-enhancer within an intergenic space between human *SOX21* and *GPR180* is associated with *SOX21*. **(C)** CNE-enhancer within an intergenic space between human *CDCA1* and *PBX1* is associated with *PBX1*.

**A**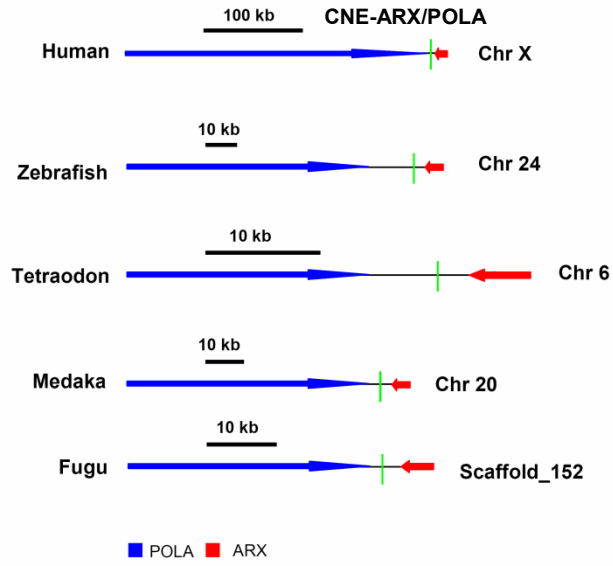**B**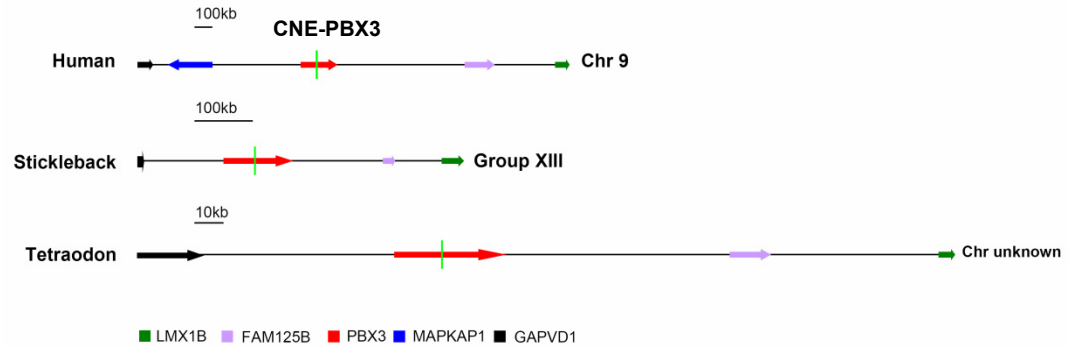**C**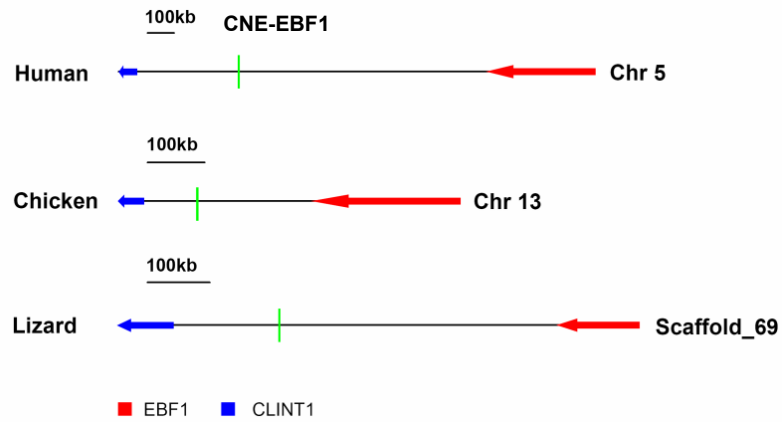**D**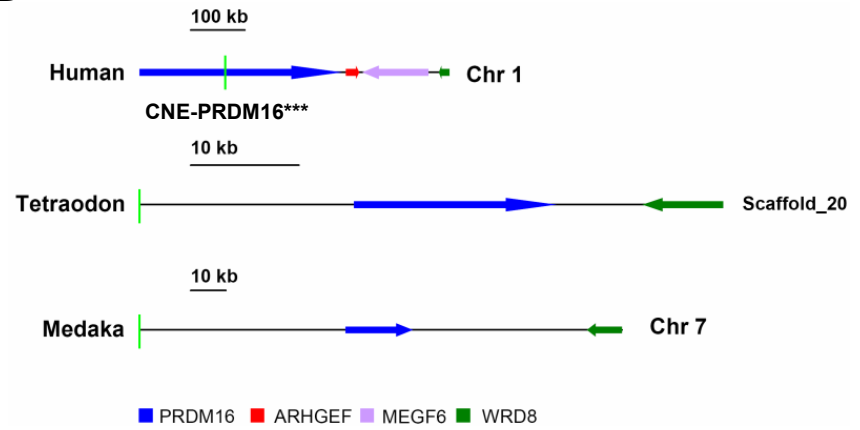

**Figure 11. Target gene identification of human CNE-enhancers through orthology mapping (hs122/hs818/hs1130/hs705).**

Human-fish comparative analysis of human loci and comparing the reporter expression domains induced by CNEs with neighboring genes expression pattern helped in assigning the target genes to CNE-enhancers. **(A)** An intergenic CNE-enhancer showed conserved positioning with respect to *ARX* and *POLA* genes in human and teleost fish lineages. The expression pattern of these genes is highly redundant and in accordance with CNE-enhancer induced reporter expression, and suggest that this enhancer might be influencing the expression of both of its neighboring genes. **(B)** The physical location of human CNE-enhancer within the intronic region of *PBX3* is conserved in its orthologous intervals in fish lineages, along with other bystander genes. However the endogenous expression pattern of *PBX3* matches with that of reporter gene expression, clearly inferring the association of enhancer with *PBX3*. **(C)** Human-fish comparative syntenic analysis revealed the conservation of CNE between *EBF1* and *CLINT1* along with these genes , moreover the expression pattern suggest specificity of this CNE enhancer to human *EBF1*. **(D)** Human-fish comparative syntenic analysis revealed the conservation of CNE and *PRDM16* linkage in both lineages, moreover the expression pattern also suggest specificity of this CNE enhancer to human *PRDM16*.

A

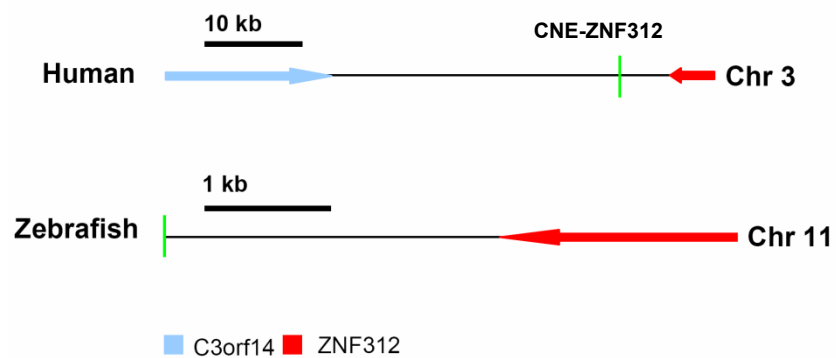

B

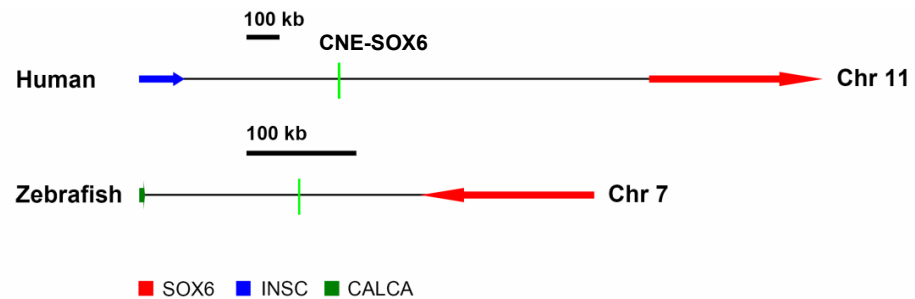

C

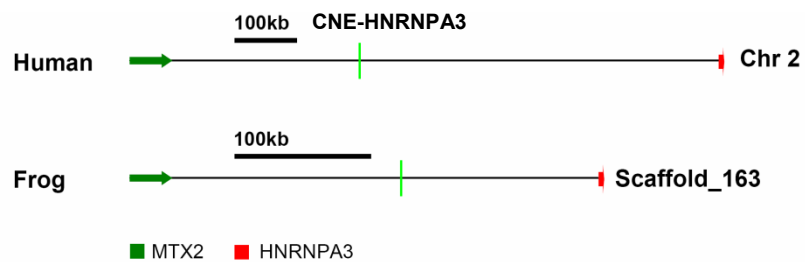

D

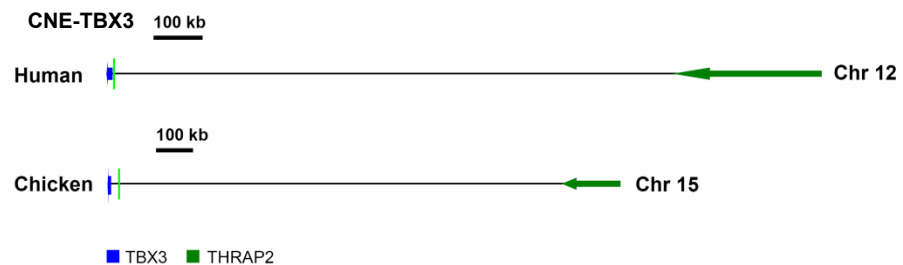

E

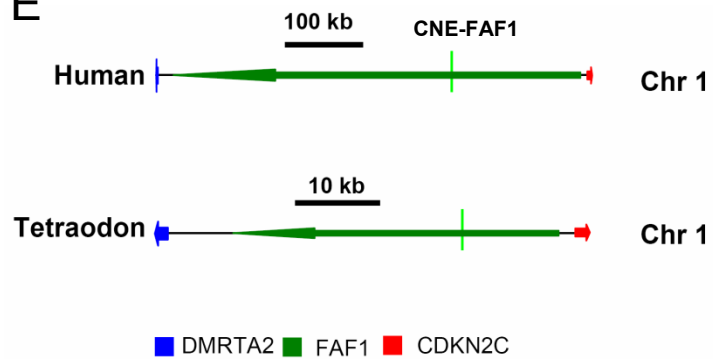

**Figure 12. Target gene identification of human CNE-enhancers through orthology mapping (hs434/hs692/hs248/hs483/hs194).**

Comparing the human fish genic content and their reporter gene expression lead to association of CNE enhancers to their respective genes. **(A)** Both synteny analysis and endogenous expression pattern clearly associate to human *ZNF312* gene. **(B)** A human CNE-enhancer positioned in the intergenic space between human *INSC* and *SOX6* gene is similarly associated with the zebrafish *SOX6* but not with *INSC* strongly suggesting that the human *SOX6* is under the regulatory control of this intergenic enhancer. **(C)** Human-fish conserved linkage and expression analysis associate a human intergenic enhancer with *HNRNPA3* gene. **(D)** The localization of CNE-enhancer in the intergenic space between *TBX3* and *THRAP2* and conservation of this arrangement down to chicken lineage prevents the unambiguous assignment of this CNE-enhancer to one of these genes. However comparing the endogenous expression patterns of both of these flanking genes with the reporter expression pattern induced by this CNE in transgenic mice assay clearly associate this CNE-enhancer to human *TBX3* gene. **(E)** Analyzing the expression pattern and conservation in fish lineage shows that an intragenic CNE-enhancer is regulating the expression of *FAF1*.



**A**

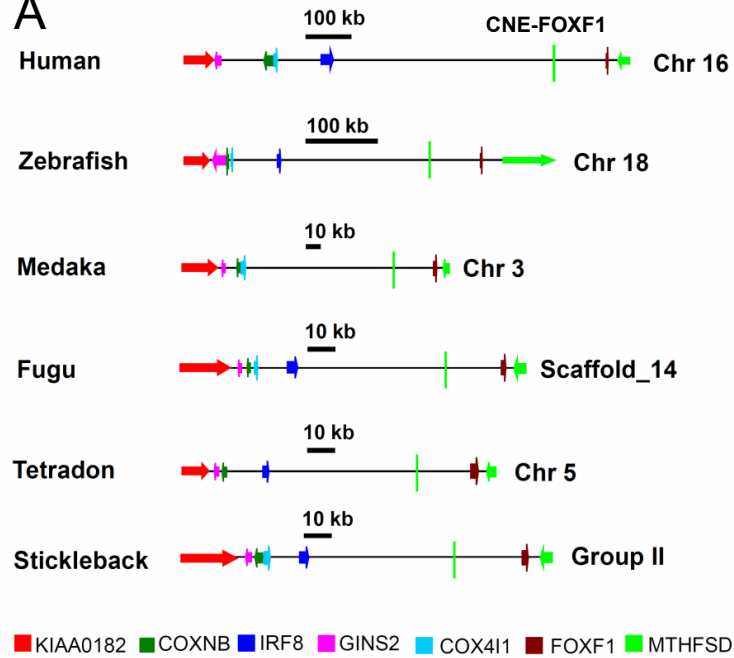

**B**

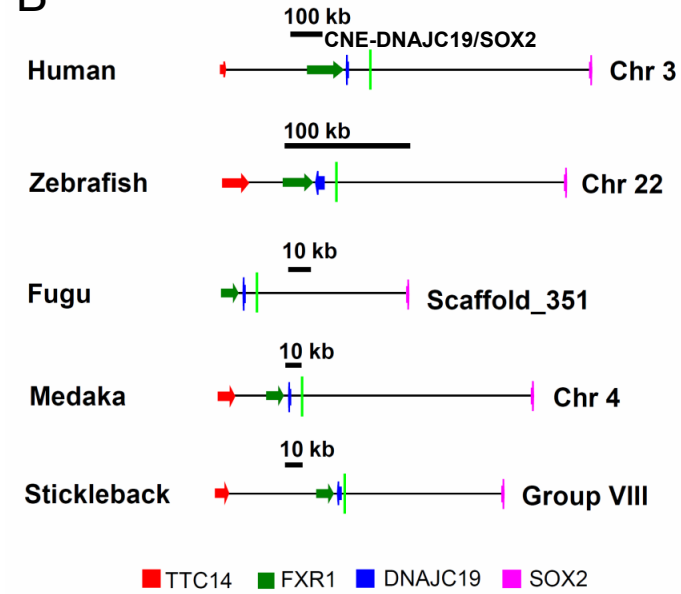

**C**

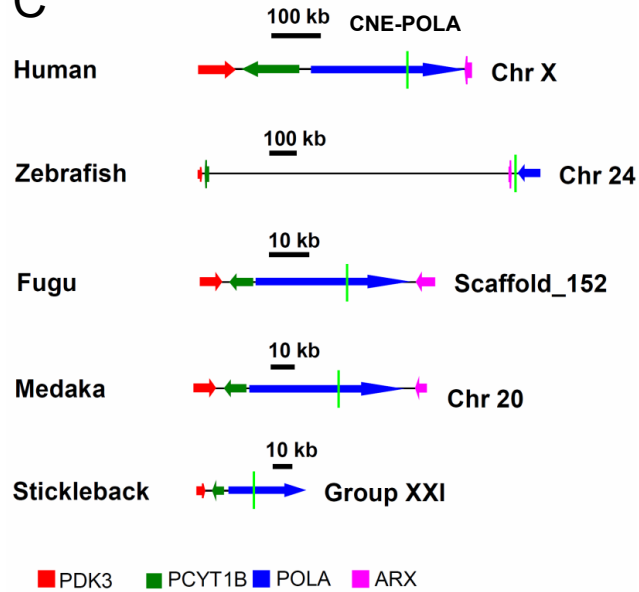

**D**

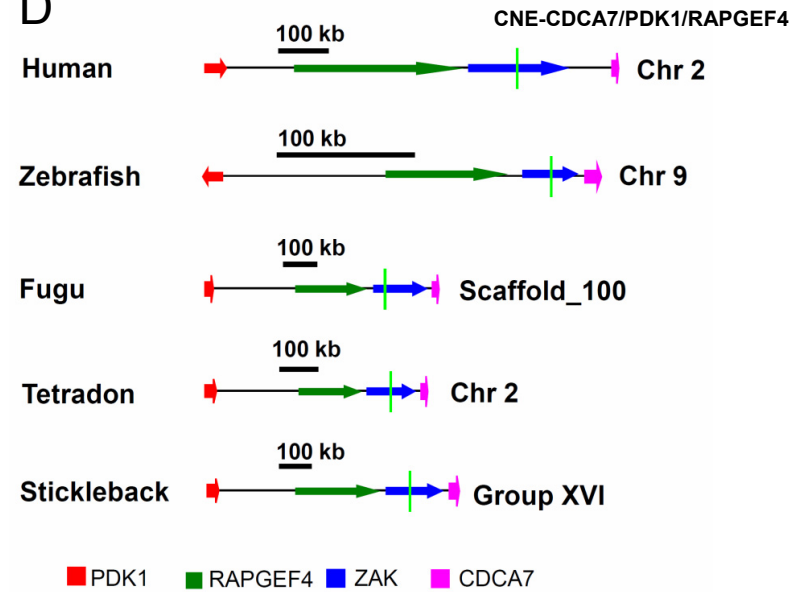

**Figure 13. Target gene identification of human CNE-enhancers through orthology mapping (hs1/hs192/hs121/hs242).**

Analysis of genic environment of human CNE-enhancers in teleost fish orthologous genomic intervals and observing their expression patterns helps in identifying their target genes. **(A)** The conserved localization of CNE in the intergenic region near *FOXF1* and harmony of their redundant endogenous expression pattern with that of reporter expression induced by this CNE-enhancer in transgenic mice assay suggest the association of this enhancer with *FOXF1* gene. **(B)** A human fish positioning of CNE enhancer between *DNAJC19* and *SOX2* genes and redundancy in the endogenous expression domains of these two genes and CNE induces reporter expression pattern hinders the unambiguous association of this CNE enhancer with either of flanking human genes. **(C)** Human fish comparative analysis of CNE containing locus and comparison of expression domains of CNE enhancer induced reporter expression with endogenous expression pattern of genes present in the human locus suggest that this intragenic human CNE enhancer is associated with regulation of *POLA* genes. **(D)** The conserved physical location of CNE-enhancer within intronic region of *ZAK* in fish and human lineages suggest its association with *ZAK* gene, however the expression studies of neighboring conserved genes infers that this CNE might be regulating the expression of *CDCA7*, *PDK1* and *RAPGEF4* rather than *ZAK*.

A

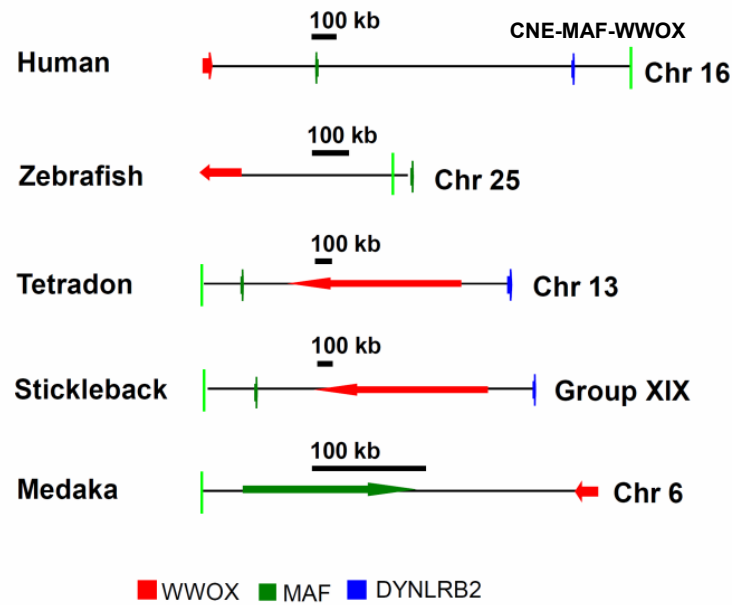

B

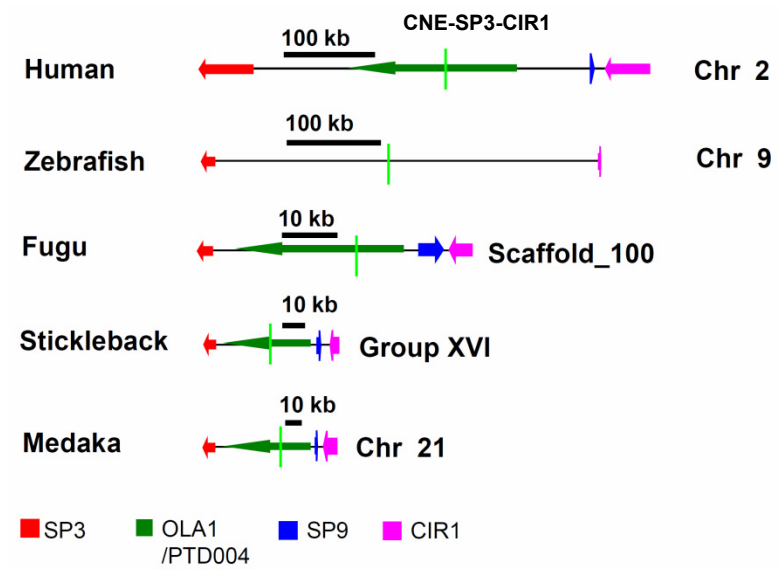

C

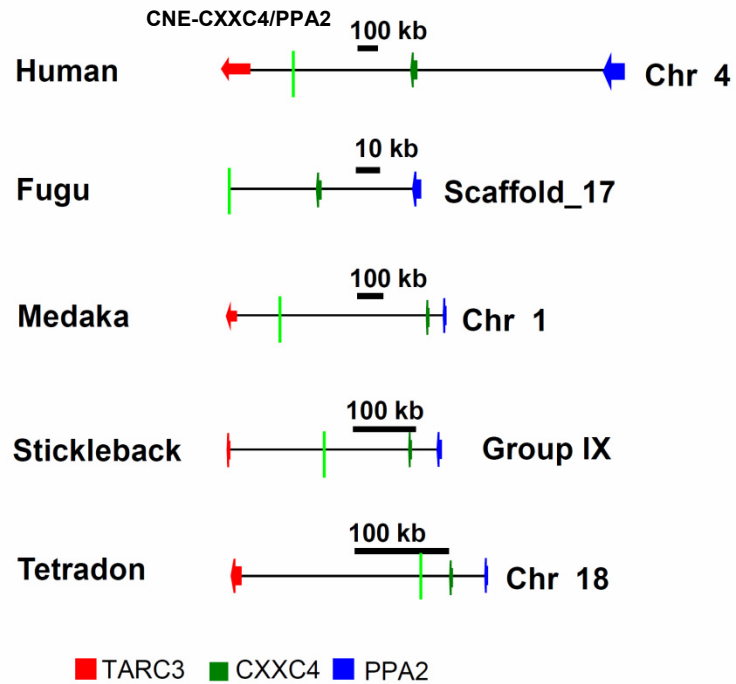

**Figure 14. Target gene identification of human CNE-enhancers through orthology mapping (hs4/hs244/hs260).**

Comparative analysis and expression pattern studies help in associating the enhancer to its target gene. **(A)** Comparative analysis of CNE enhancer in fish and human lineages show conserved localization of enhancer along with *MAF* and *WWOX* genes. Moreover comparing the endogenous expression of these genes with reporter gene expression of CNE also suggest the associates this enhancer with *WWOX* or *MAF*. **(B)** The CNE-enhancer is located within intronic region of *PTD004* in human and some fish lineages. The comparative syntenic analysis of human locus with multiple fish lineages suggest its association with *SP3* or *CIR* ,moreover expression pattern studies also favors this association. **(C)** Comparative syntenic analysis of CNE enhancer containing region suggest the association of CNE with either *CXXC4* or *PPA2*.

**A**

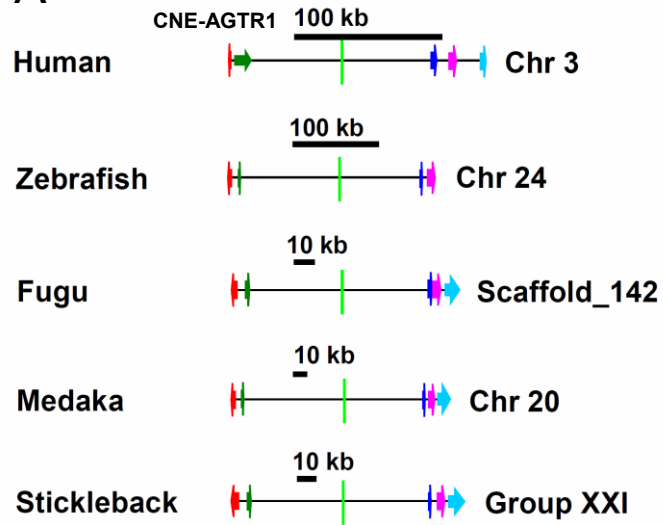

■ ZIC4 ■ ZIC1 ■ AGTR1 ■ CPB1 ■ GYG1

**C**

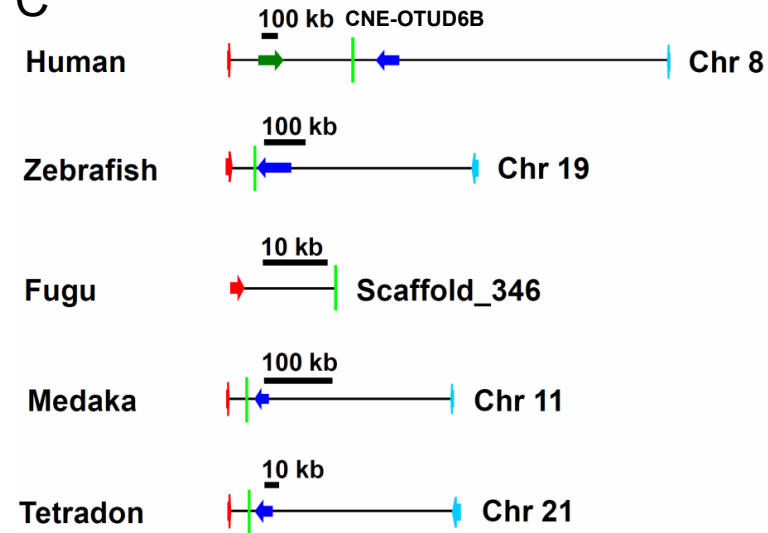

■ OTUD6B ■ RUNX1T1 ■ SLC26A7 ■ FAM92A1

**B**

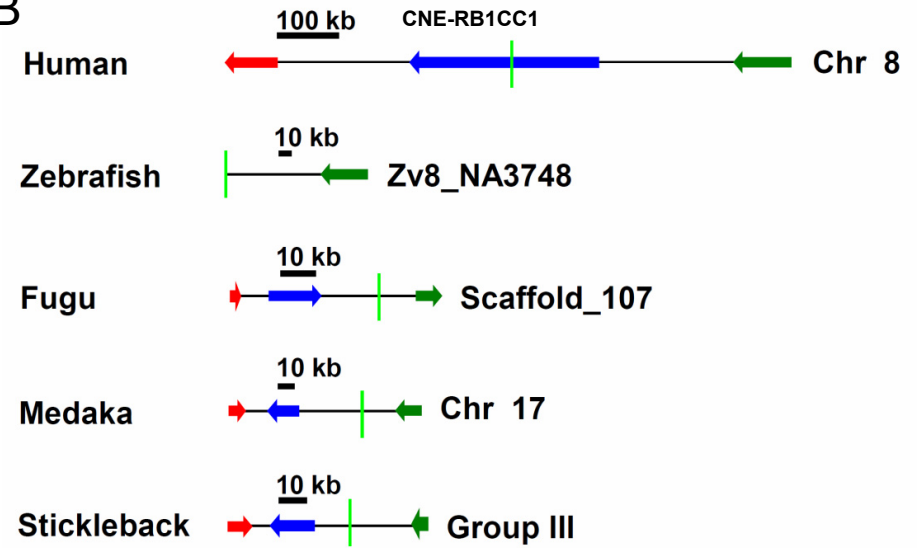

■ PCMTD1 ■ ST18 ■ RB1CC1

**D**

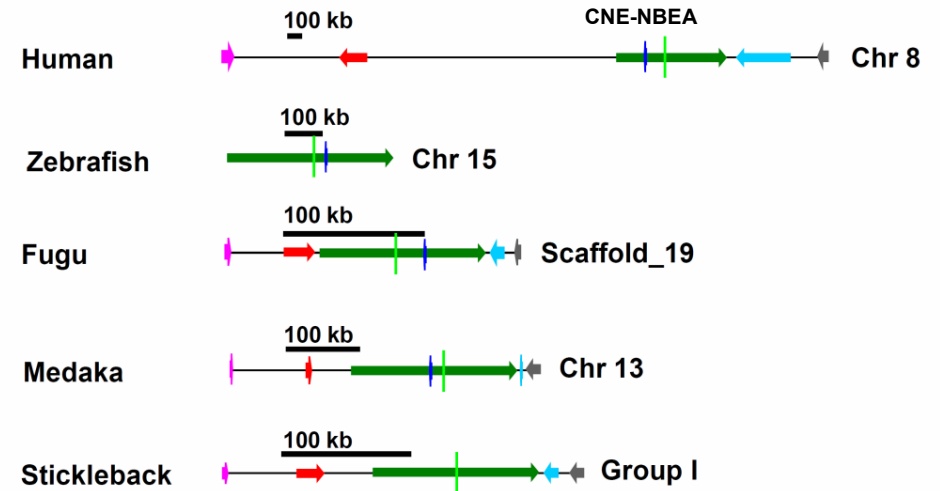

■ STARD13 ■ MAB21L1 ■ NBEA ■ DCLK1 ■ BRCA2 ■ SPG20

**Figure 15. Target gene identification of human CNE-enhancers through orthology mapping (hs654/hs698/hs669/hs1330).**

Comparative analysis and expression pattern studies help in finding the target gene for CNE enhancer. **(A)** The CNE-enhancer is located in the intergenic space between *ZIC1* and *AGTR1* and this positioning is conserved in human-fish comparison, however comparing the endogenous expression pattern of flanking genes with reporter expression induced by this CNE enhancer suggest that this CNE enhancer might be associated with regulation of human *AGTR1* gene. **(B)** Human CNE enhancer is located in the intronic region of *ST18* on chromosome 8. Comparative analysis of this locus in fish lineage clearly link this CNE enhancer with the regulation of *RBICCI* gene moreover endogenous expression pattern of *RBICCI* also suggest it as a target gene for this enhancer. **(C)** Human fish comparative analysis of CNE enhancer containing region shows conservation of CNE near *OTUD6B* suggesting it to be the target gene for this CNE. **(D)** The conserved localization of CNE-enhancer within intronic region of *NBEA* in human and all fish lineages, and its redundant expression in accordance with CNE enhancer induced reporter gene expression unmistakably links this CNE enhancer with the regulation of *NBEA* gene.

**A**

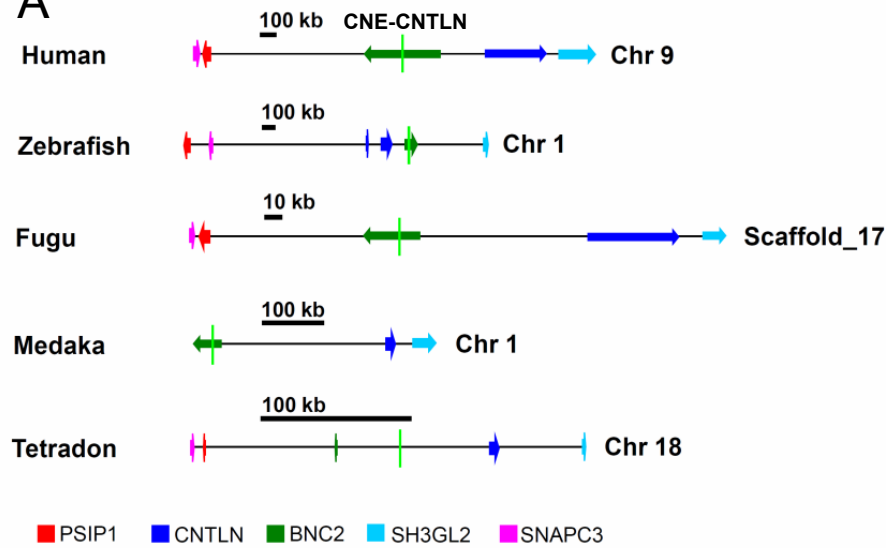

**B**

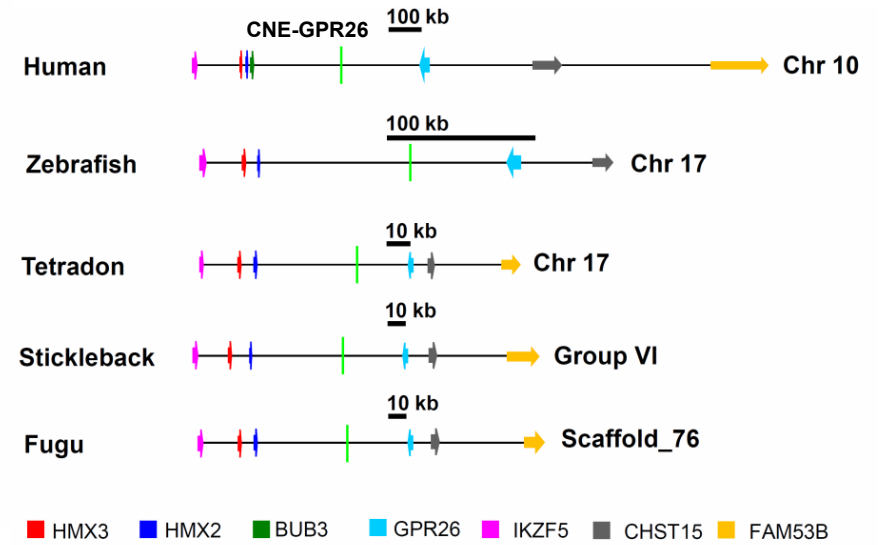

**C**

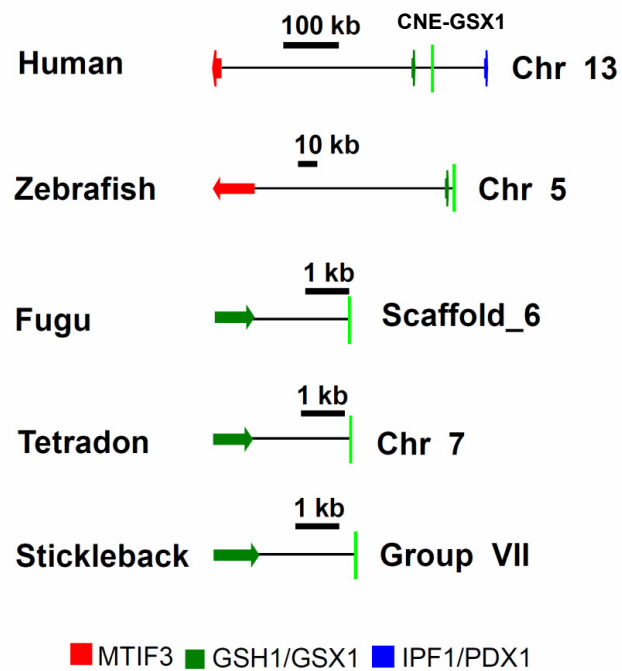

**Figure 16. Target gene identification of human CNE-enhancers through orthology mapping (hs307/hs578/Hs532).**

(A) The conserved positioning of CNE-enhancer within intronic region of *BNC2* in human and some fish lineages suggest its association with *BCN2* whereas human fish comparative syntenic analysis and expression pattern studies favors its association with *CNTLN* rather than *BNC2*. (B) Human CNE enhancer is located in the intergenic space between *BUB3* and *GPR26*. Comparative syntenic analysis of the human locus with orthologous region of this element in teleost fish lineage reveals the association of this CNE with *GPR26*, also the expression pattern of *GPR26* is in accordance with that of reporter gene expression leading to the unambiguous association of *GPR26* as the target gene for this CNE. (C) Conserved positioning of the enhancer near *GSH1* gene in human and fish lineages along with endogenous expression of *GSH1* in accordance with CNE induced reporter gene expression clearly suggests that this enhancer is associated with regulation of *GSH1* gene.



A

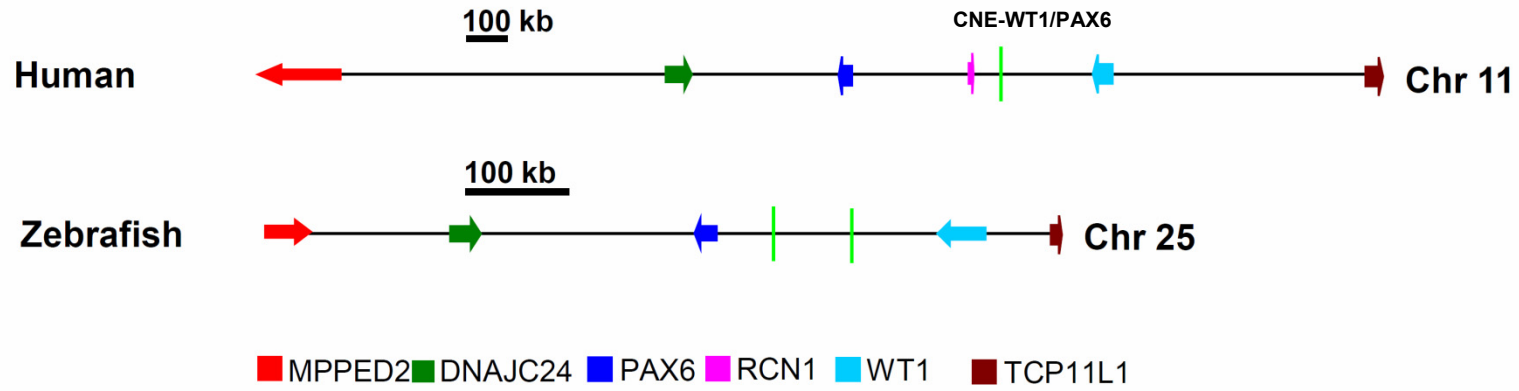

B

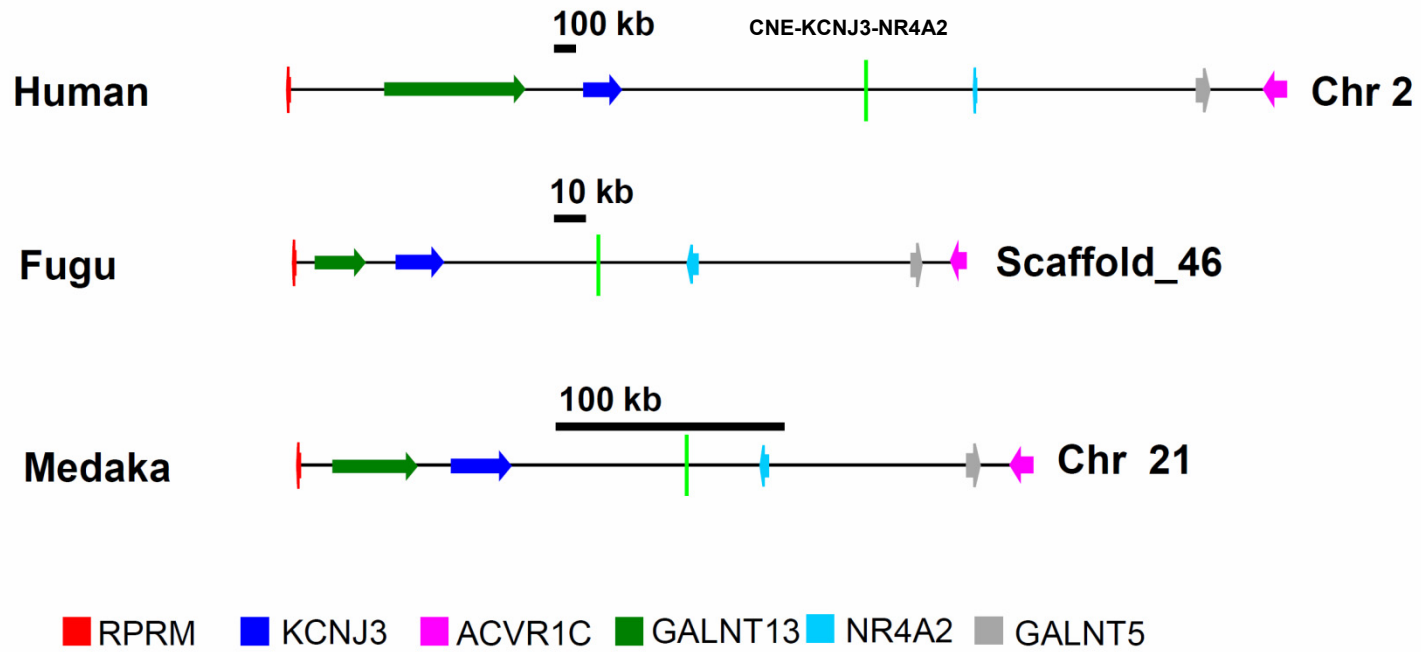

**Figure 17. Target gene identification of human CNE-enhancers through orthology mapping (hs113 /hs411).**

Analysis of CNE-enhancers in humans and its orthologous genomic intervals teleost fish lineage helps in associating CNE to their target genes. **(A)** CNE-enhancer is positioned within an intergenic space between human *RCN1* and *WT1* on chromosome 11. Comparative syntenic analysis in fish lineage and expression pattern studies suggest the association of this CNE with *PAX6* or *WT1*. **(B)** Conserved localization of CNE-enhancer in the intergenic space between human *KCNJ3* and *NR4A2* and all other fish lineages and expression pattern of these genes in accordance with CNE enhancer suggest that this CNE is associated with either of flanking genes.

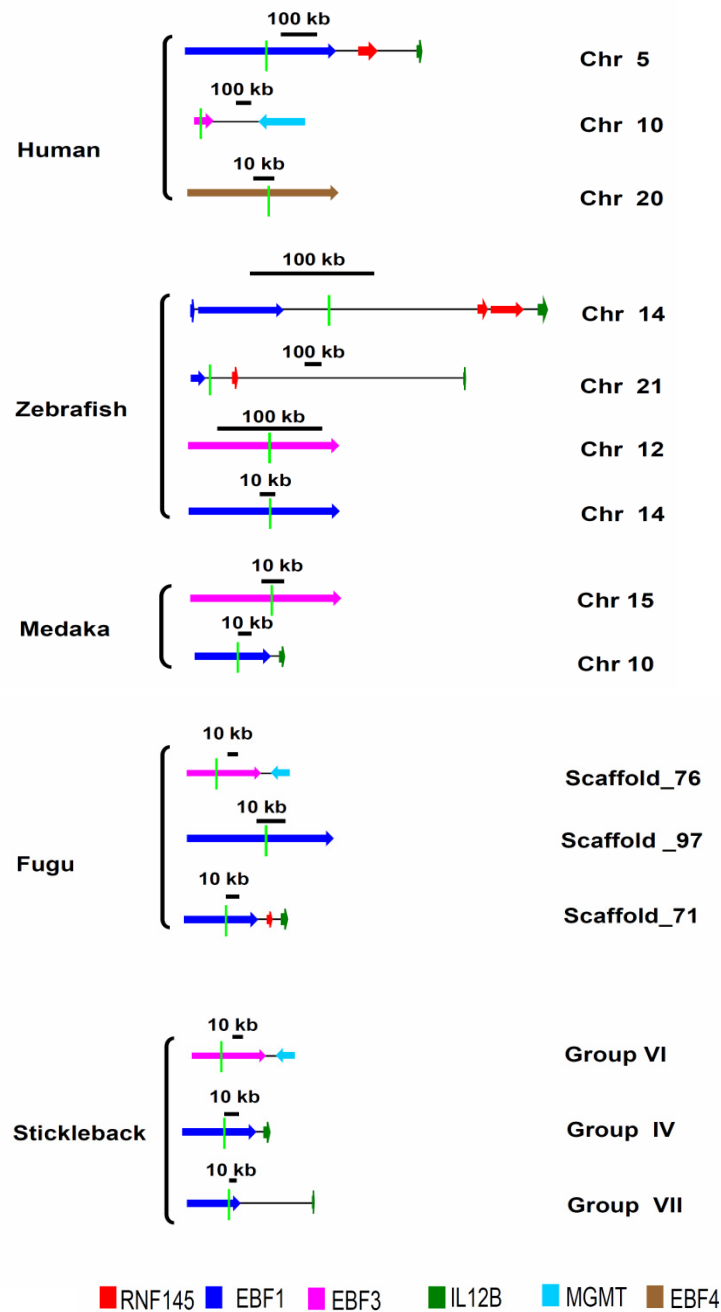

**Figure 18. Target gene identification of human CNE-enhancers through orthology mapping (hs230).**

Human enhancer target gene duplicated early in vertebrate history before mammal fish divergence. Comparing the genic content of *CNE-EBF* paralogous loci in human genome and their orthologous loci in multiple fish lineages clearly suggests that duplicated copies of human *CNE-EBF* enhancer are associated with the regulation of paralogous copies of *EBF* family members i.e.; *EBF1*, *EBF3* and *EBF4*. The examination of fish loci also suggest the lineage specific duplication of *CNE-EBF* enhancer in teleost fish.

A

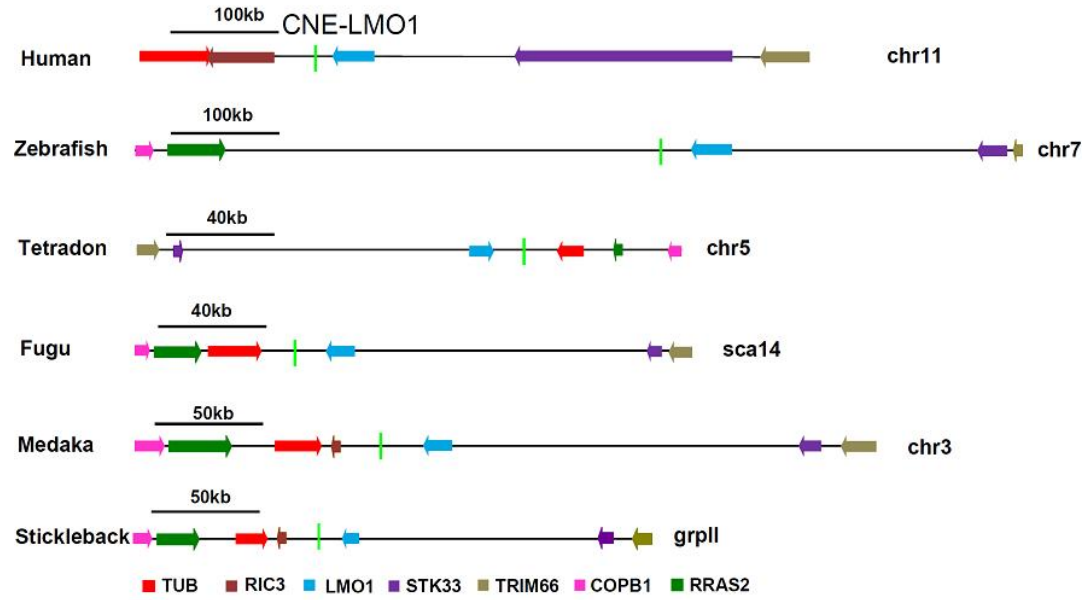

B

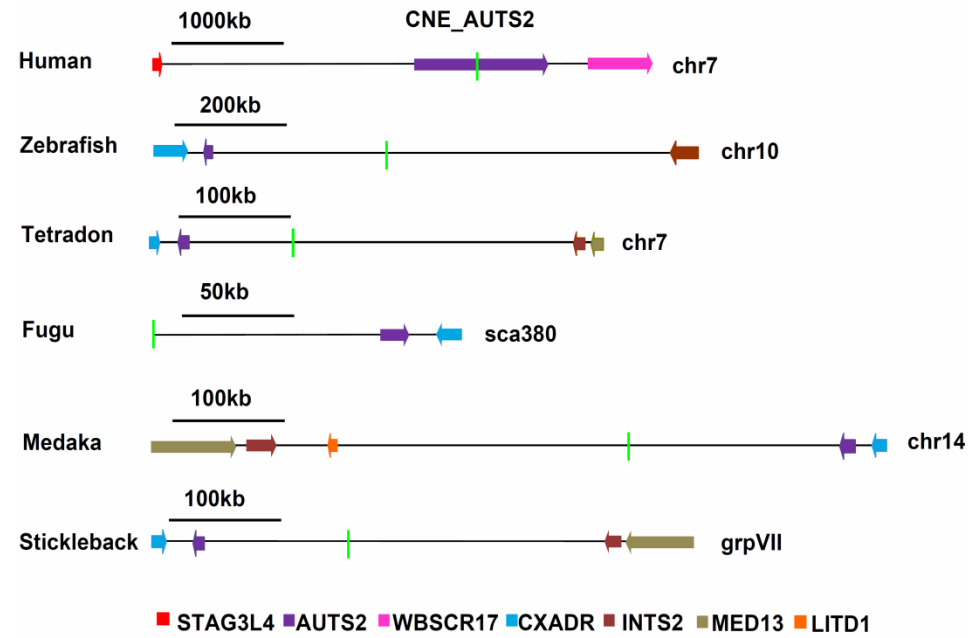

**Figure 19. Analysis of genic environment of human CNE-enhancers in teleost fish orthologous genomic intervals helps in identifying their target genes (hs1859/hs1425).**

Systematic analysis of the surrounding region of CNE enhancers, conserved across the tetrapod-teleost lineages, carved a pathway to associate the CNE enhancer to its target genes. **(A)** Comparative syntenic analysis of human and teleost fishes and the expression pattern analysis clearly depicts the connection between the CNE and *LMO1*, because of their conservation throughout the vertebrate genome. **(B)** Analyzing the expression pattern and conservation in tetrapod and fish lineages show that an intragenic CNE-enhancer is regulating the expression of *AUTS2*.

A

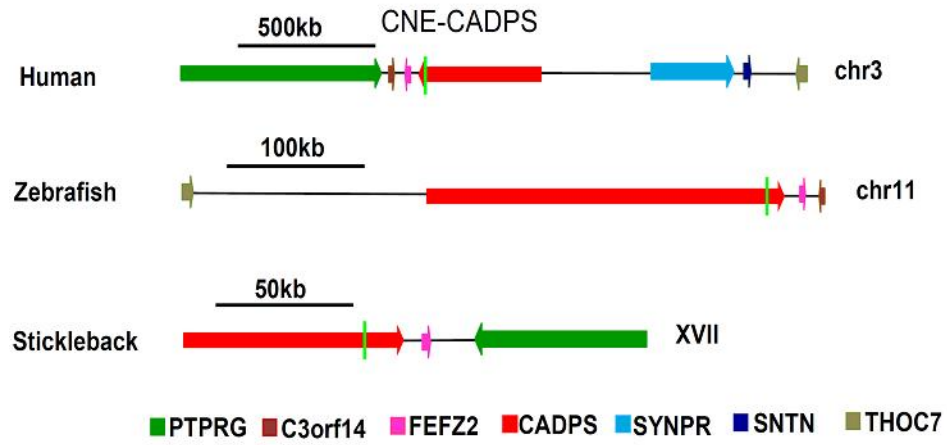

B

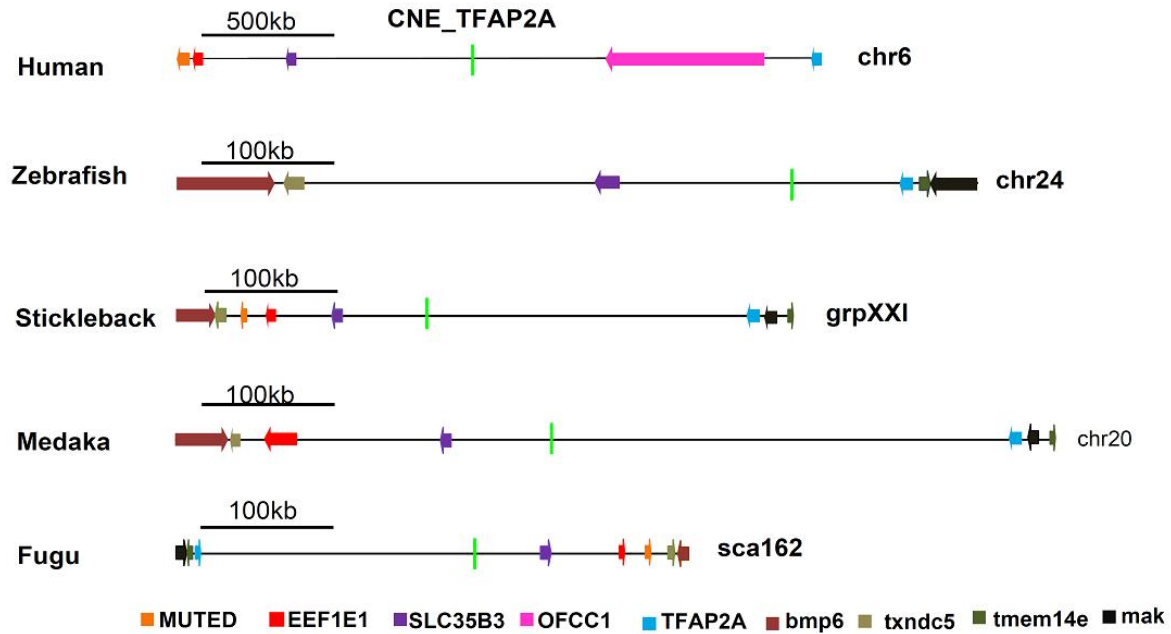

**Figure 20. Assigning the target genes to CNE-enhancers through comparative genomic analysis (hs1316/ hs1315).**

Through Comparative genomic analysis of functionally defined CNE enhancers, across tetrapod-teleost lineages, cis regulatory networks of human genes are defined. **(A)** Not only the CNE but also its intronic location in *CADPS*, conserved in both human and teleost lineages, suggests the link exists between CNE and *CADPS* which is further confirmed by endogenous expression pattern analysis of both the CNE and the gene. **(B)** Studying the orthologous genomic content in the neighboring region of CNE enhancer in tetrapod-teleost lineages demonstrate the relationship between CNE and its target gene *TFAP2A*.



A

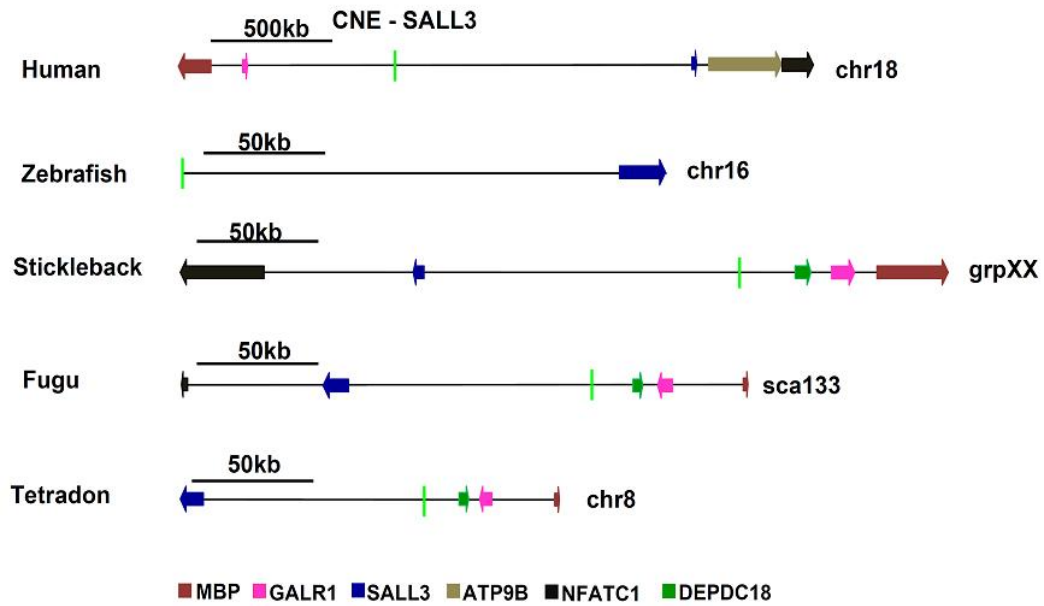

B

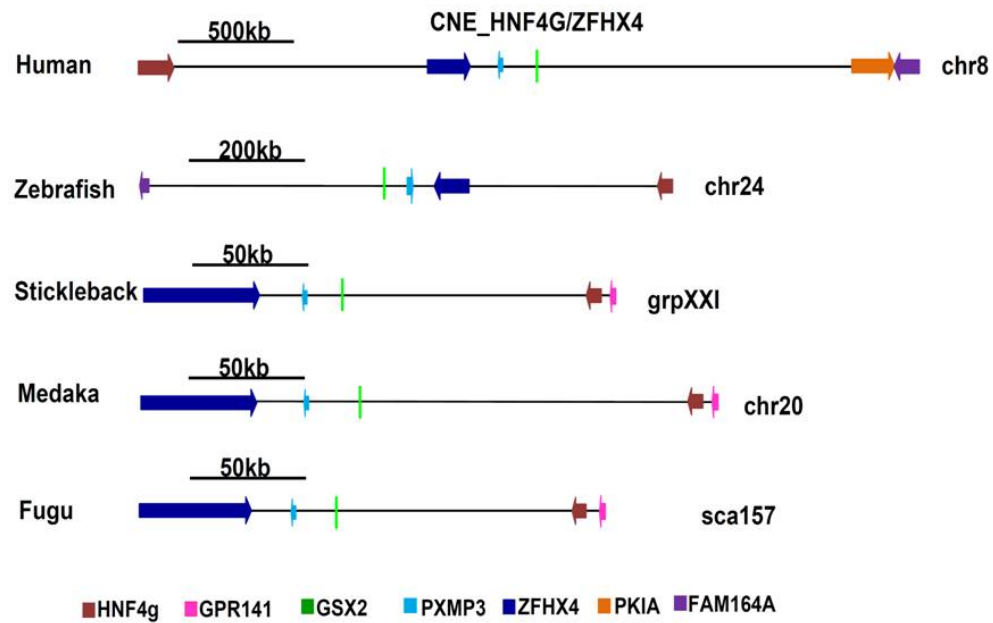

**Figure 21. Comparing the human-fish genic content and their reporter gene expression lead to association of CNE enhancers to their respective genes (hs1186/hs1318).**

Target genes of CNE enhancers are identified through orthology mapping in Human and teleost fishes. **(A)** By tracing the genomic content around the CNE in tetrapod and fish lineages it becomes evident that the CNE is regulatory element of *SALL3*. Redundant expression pattern of the gene and CNE is also in accordance with each other. **(B)** Conservation of *ZFHX4* and *HNF4G* through out the vertebrate genome and endogenous expression pattern analysis of CNE matches with both these genes proposes them as target genes of CNE.

A

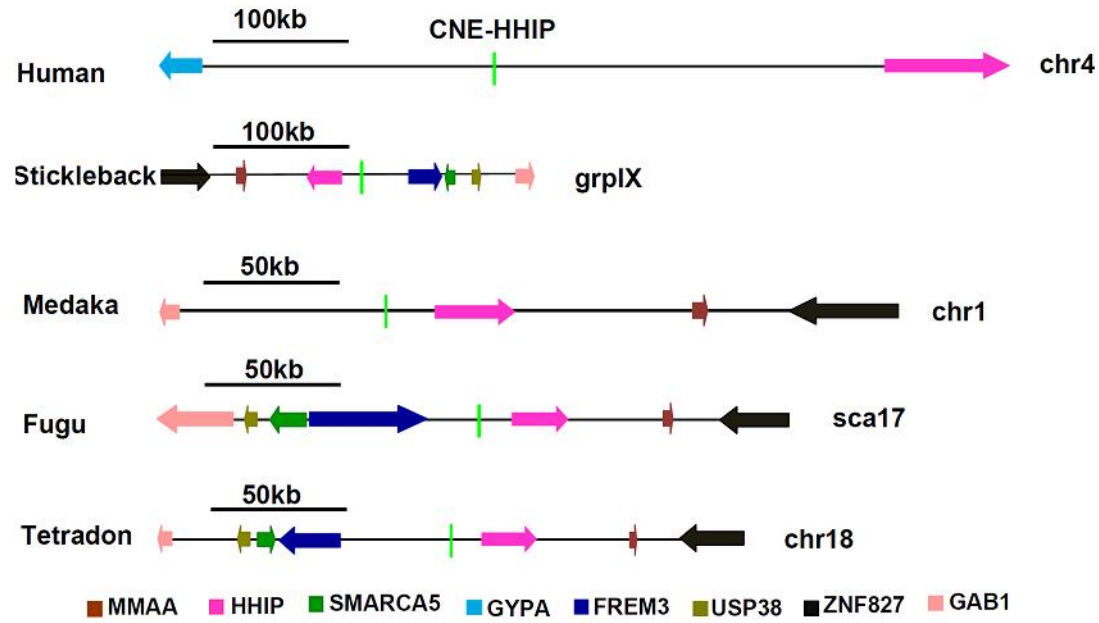

B

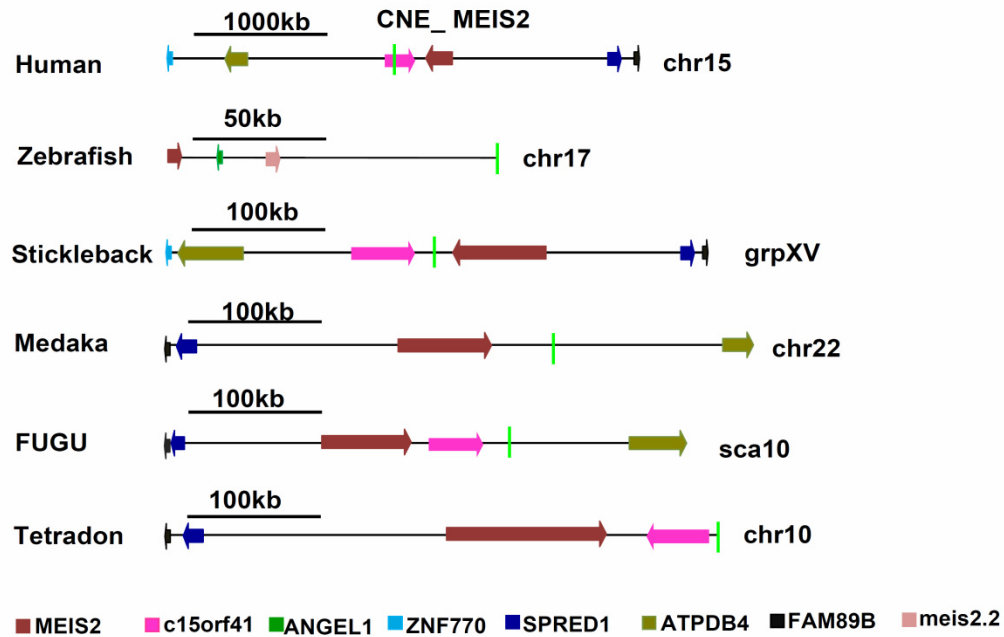

**Figure 22. Analysis of genic environment of human CNE-enhancers in teleost fish orthologous genomic intervals and observing their expression patterns helps in identifying their target genes (hs906/hs828).**

Gene, controlled by specific regulatory elements, are identified through the systematic analysis of orthologous genomic content, which harbors functionally identified CNE enhancers, of tetrapod-teleost lineages. **(A)** Conserved localization of CNE and *HHIP* in tetrapod-teleost lineages demonstrate the linkage between them. Redundant expression pattern analysis of CNE and *HHIP* also emphasizes this idea. **(B)** Genic architecture analysis of the orthologous loci holding the CNE enhancers in vertebrate genome recommends the association of CNE with *MEIS2*.

A

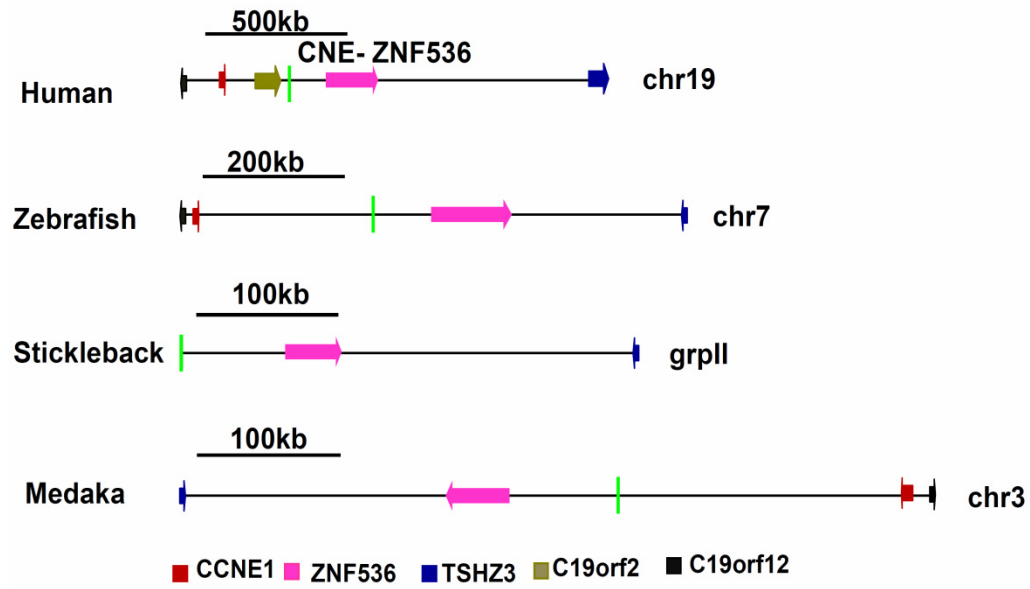

B

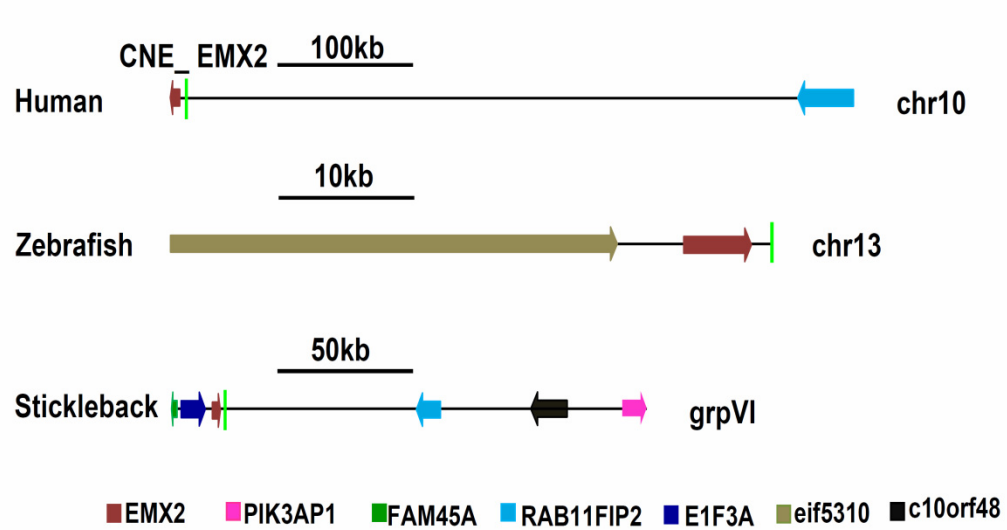

**Figure 23. Analysis of genic environment of human CNE-enhancers in teleost fish orthologous genomic intervals helps in identifying their target genes (hs858/hs935).**

Analysis of CNE-enhancers in humans and its orthologous genomic intervals teleost fish lineage helps in associating CNE to their target genes. **(A)** Both synteny analysis and endogenous expression pattern clearly associate the CNE to human *ZNF536* gene. **(B)** CNE residing between *EMX2* and *RAB11FIP2* in humans is also conserved along with *EMX2*, with differential loss and gain of bystander genes, in teleost fishes. Comparison of reporter gene expression of CNE enhancer and *EMX2* also confers *EMX2* as target gene of CNE.

A

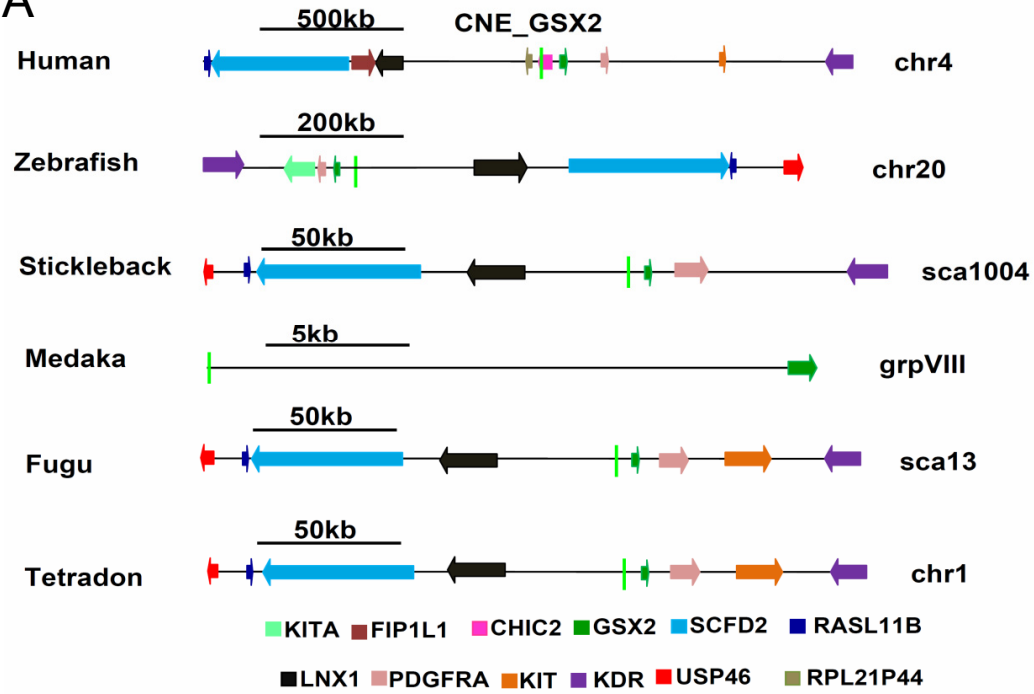

B

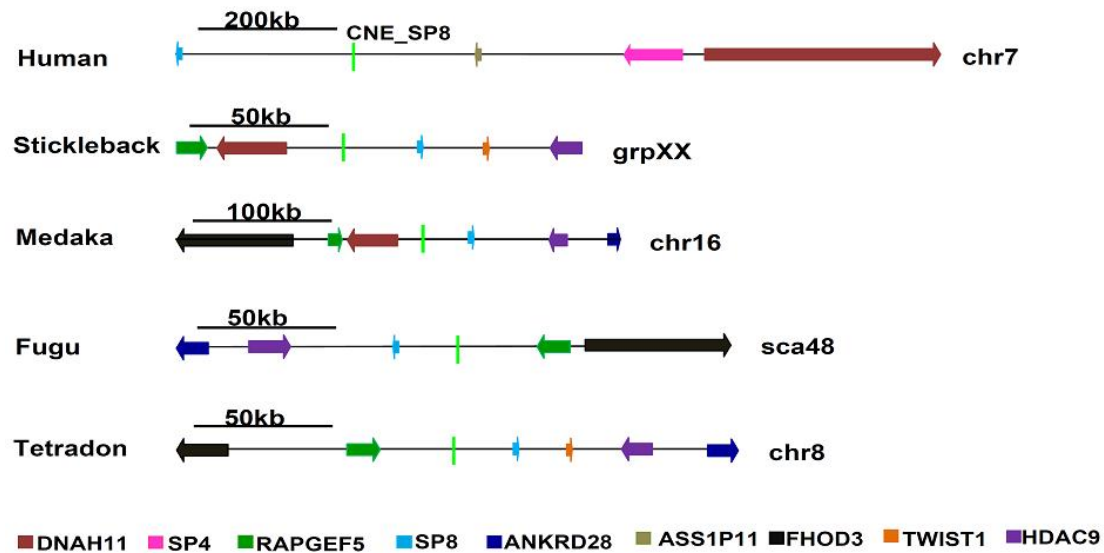

**Figure 24. Assigning the target genes to CNE-enhancers through comparative genomic analysis (hs687/hs701).**

Systematic analysis of the surrounding region of CNE enhancers, conserved across the tetrapod-teleost lineages, carved a pathway to associate the CNE enhancer to its target genes. **(A)** Comparative syntenic analysis of human and teleost fishes and the expression pattern analysis clearly depicts the connection between the CNE and *GSX2*, because of their conservation throughout the vertebrate genome. **(B)** Analyses of expression pattern and conservation in tetrapod and fish lineages shows that CNE-enhancer is regulating the expression of *SP8*.



A

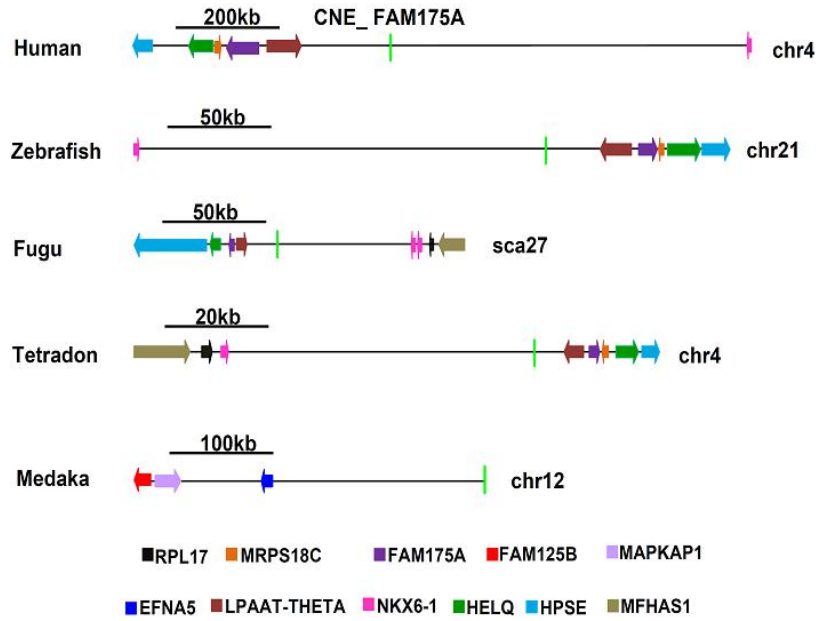

B

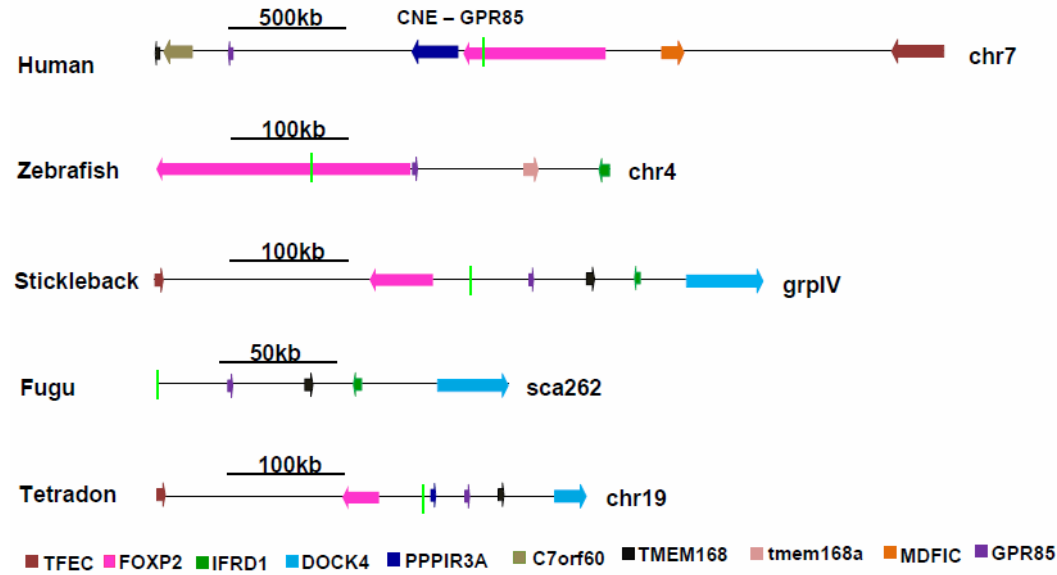

**Figure 25. Analysis of genic environment of human CNE-enhancers in teleost fish orthologous genomic intervals and observing their expression patterns helps in identifying their target genes (hs712/hs720).**

Through Comparative genomic analysis of functionally defined CNE enhancers, across tetrapod and fish lineages, cis regulatory networks of human genes are defined. **(A)** Conserved localization of CNE and *FAM175A* in tetrapod-teleost lineages demonstrate the linkage between them. Redundant expression pattern analysis of CNE and *FAM175A* also emphasizes this idea. **(B)** Studying the orthologous genomic content in the neighboring region of CNE enhancer in human and teleost lineages demonstrate the relationship between CNE and its target gene *GPR85*.

A

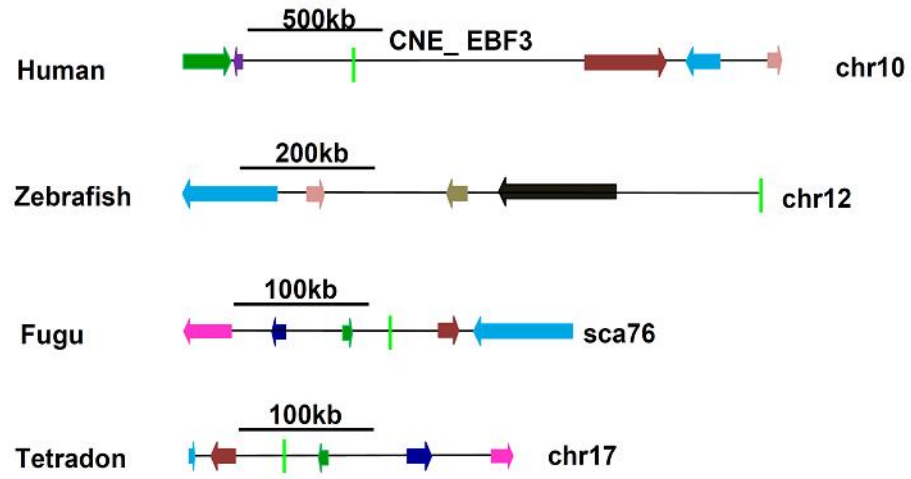

■ MGMT ■ ADAM12 ■ PTPRE ■ EBF3 ■ FAM196A ■ TCERG1L ■ dock1 ■ glrx3 ■ MKI67

B

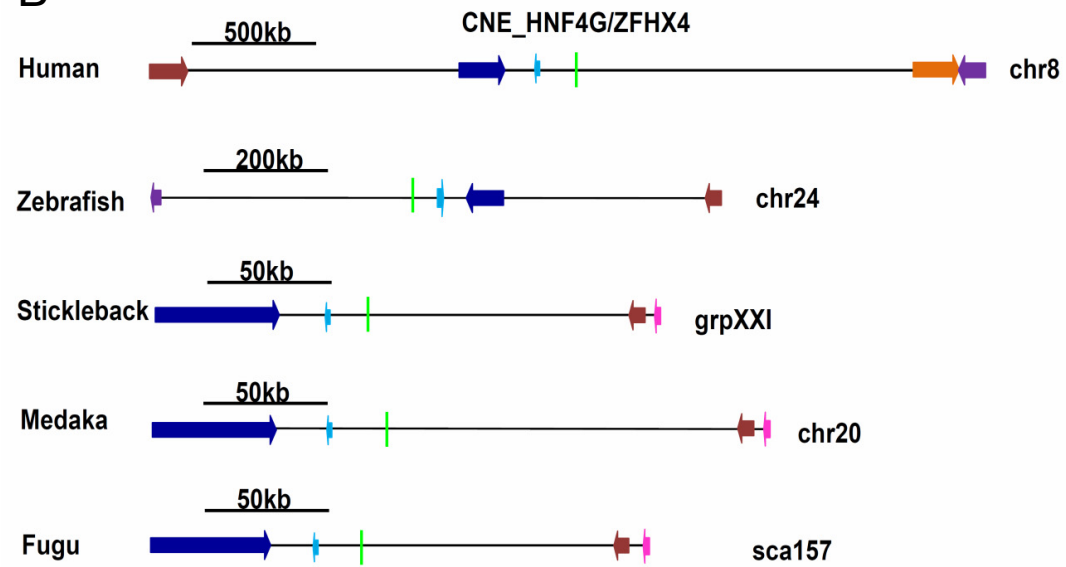

■ HNF4g ■ GPR141 ■ GSX2 ■ PXMP3 ■ ZFH4 ■ PKIA ■ FAM164A

**Figure 26. Analysis of genic environment of human CNE-enhancers in teleost fish orthologous genomic intervals helps in identifying their target genes (hs737/hs742).**

Target genes of CNE enhancers are identified through orthology mapping in Human and teleost fishes. **(A)** By tracing the genomic content around the CNE in tetrapod and fish lineages it becomes evident that the CNE is regulatory element of *EBF3*. Redundant expression pattern of the gene and CNE is also in accordance with each other. **(B)** Conservation of *ZFHX4* and *HNF4G* through out the vertebrate genome and endogenous expression pattern analysis of CNE matches with both these genes proposes them as target genes of CNE.

A

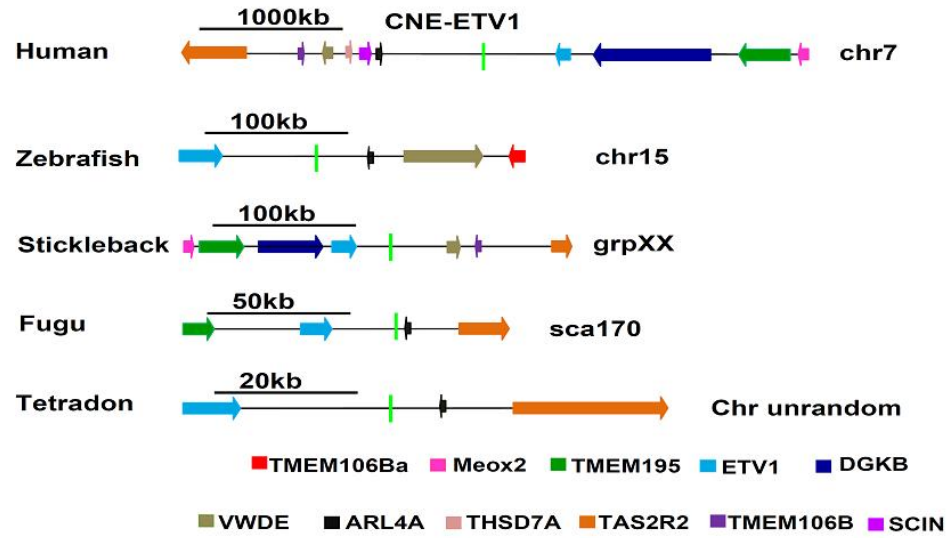

B

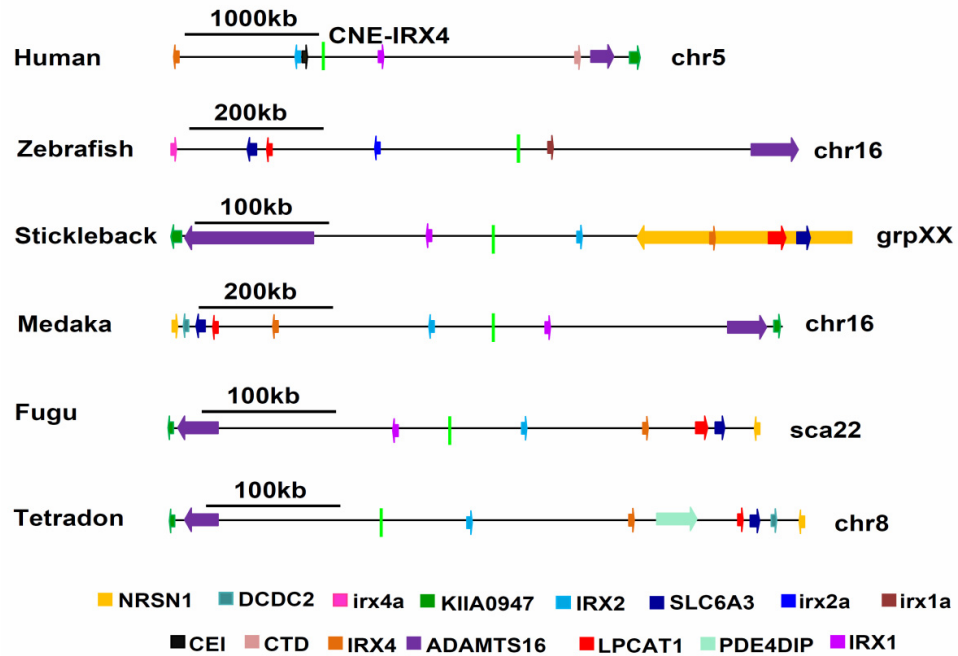

**Figure 27. Analysis of genic environment of human CNE-enhancers in teleost fish orthologous genomic intervals helps in identifying their target genes (hs749/hs754).**

Gene, controlled by specific regulatory elements, are identified through the systematic analysis of orthologous genomic content, which harbors functionally identified CNE enhancers, of tetrapod-teleost lineages. **(A)** CNE residing between *ETVI* and *ARL4A* in humans is also conserved along with *ETVI*, with differential loss and gain of bystander genes, in teleost fishes. Comparison of reporter gene expression of CNE enhancer and *ETVI* also confers *ETVI* as target gene of CNE. **(B)** Genic architecture analysis of the orthologous loci holding the CNE enhancers in vertebrate genome recommends the association of CNE with *IRX4*.

A

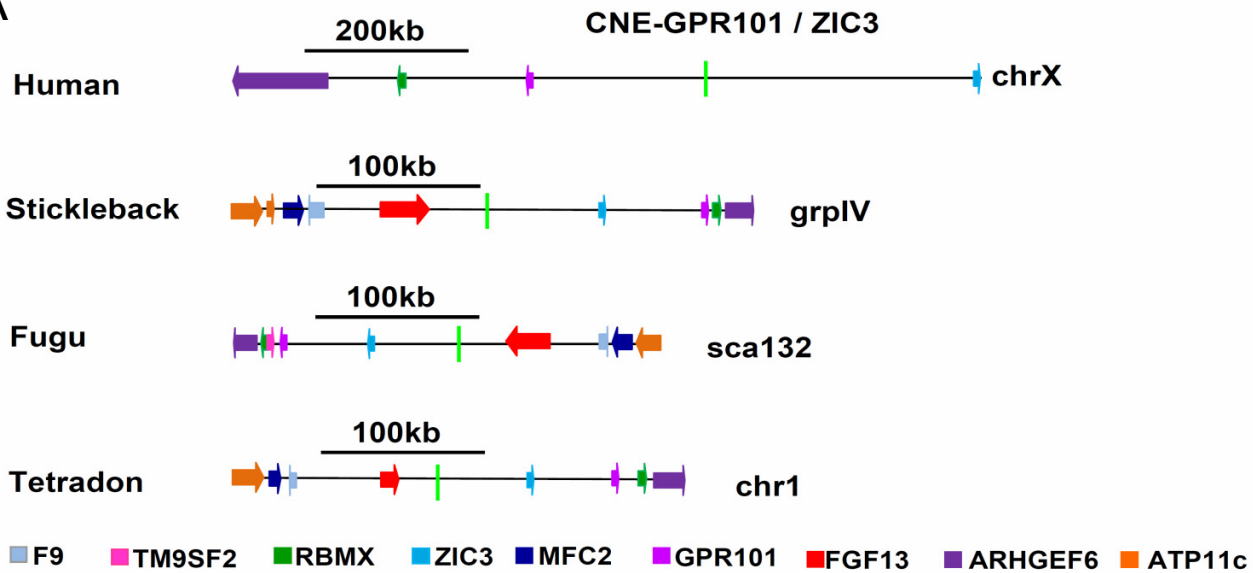

B

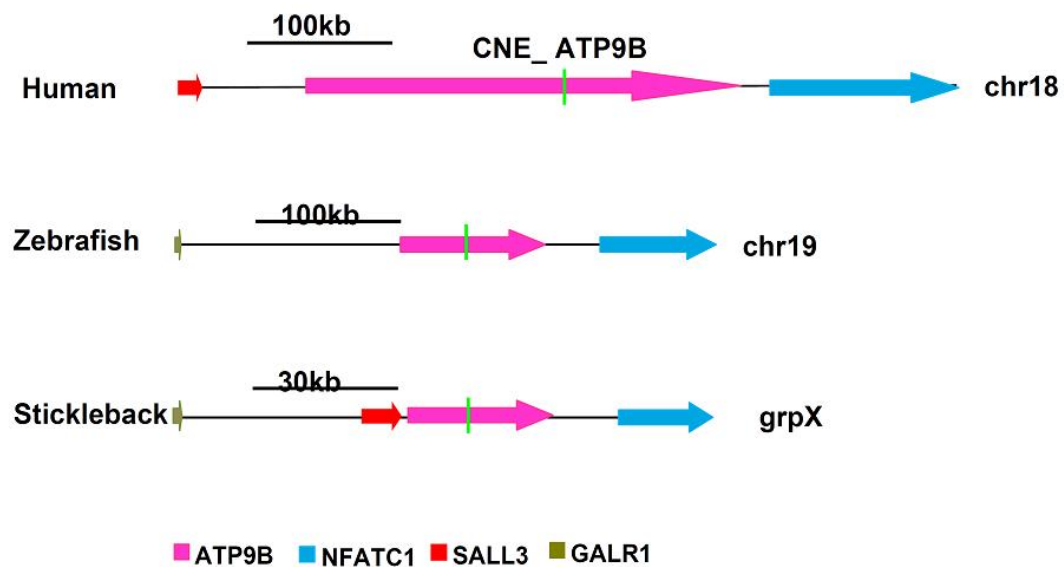

**Figure 28: Assigning the target genes to CNE-enhancers through comparative genomic analysis (hs755/hs775).**

Analysis of CNE-enhancers in humans and its orthologous genomic intervals teleost fish lineage helps in associating CNE to their target genes. **(A)** Conservation of *GPR101* and *ZIC3* through out the vertebrate genome and endogenous expression pattern analysis of CNE matches with both these genes proposes them as target genes of CNE. **(B)** Conserved intronic localization of CNE and *ATP9B* in tetrapod-teleost lineages demonstrate the linkage between them. Redundant expression pattern analysis of CNE and *ATP9B* also emphasizes this idea.



A

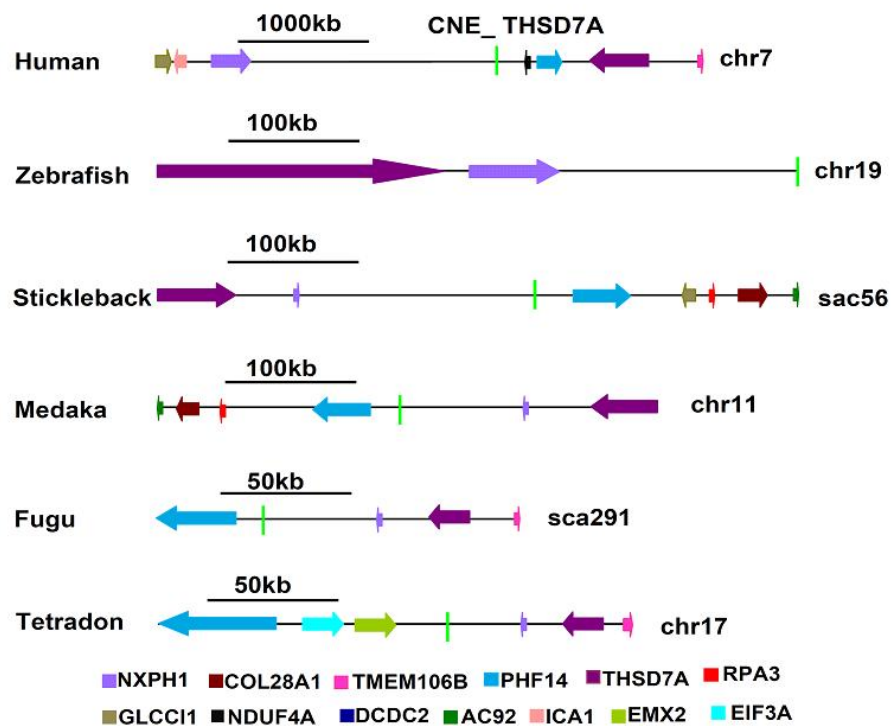

B

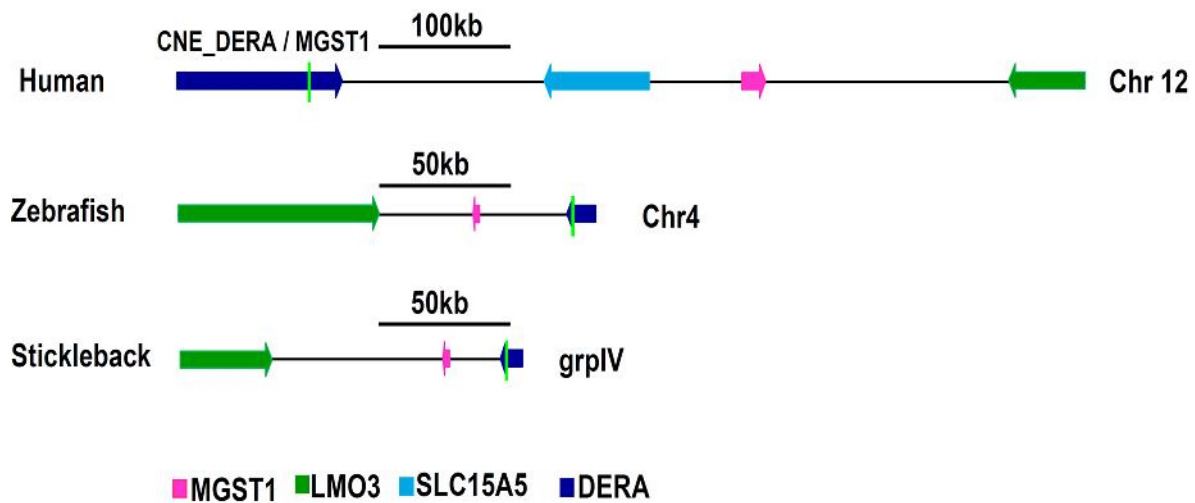

**Figure 29. Comparing the human-fish genic content and their reporter gene expression lead to association of CNE enhancers to their respective genes (hs793/hs798).**

Target genes of CNE enhancers are identified through orthology mapping in Human and teleost fishes. **(A)** By tracing the genomic content around the CNE in tetrapod and fish lineages it becomes evident that the CNE is regulatory element of *THSD7A*. Redundant expression pattern of the gene and CNE is also in accordance with each other. **(B)** Conservation of *DERA* and *MGST1* through out the vertebrate genome and endogenous expression pattern analysis of CNE matches with both these genes proposes them as target genes of CNE.

A

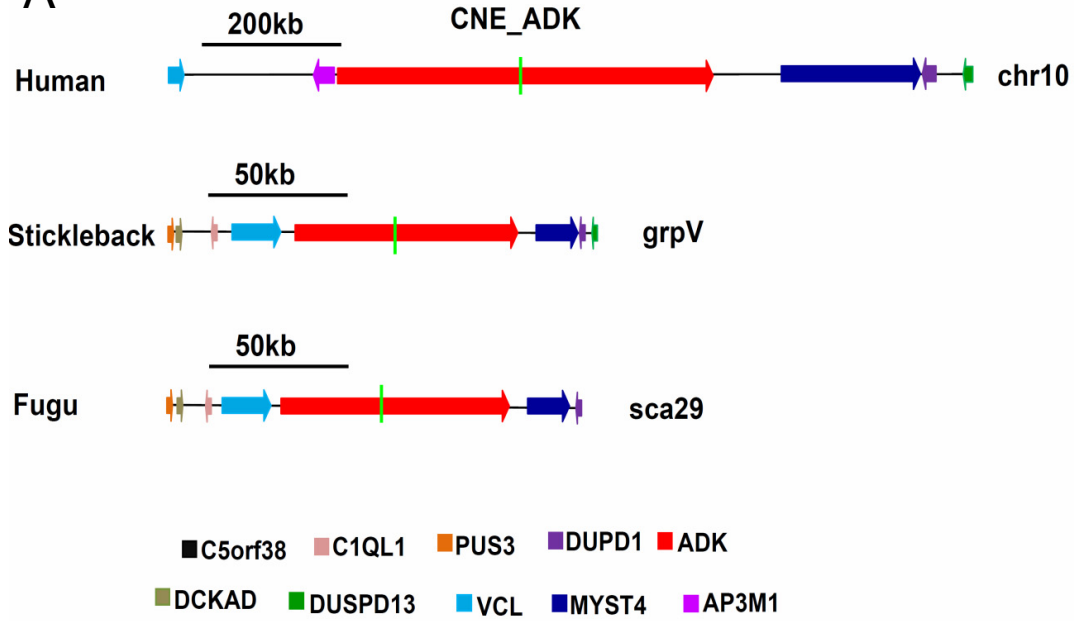

B

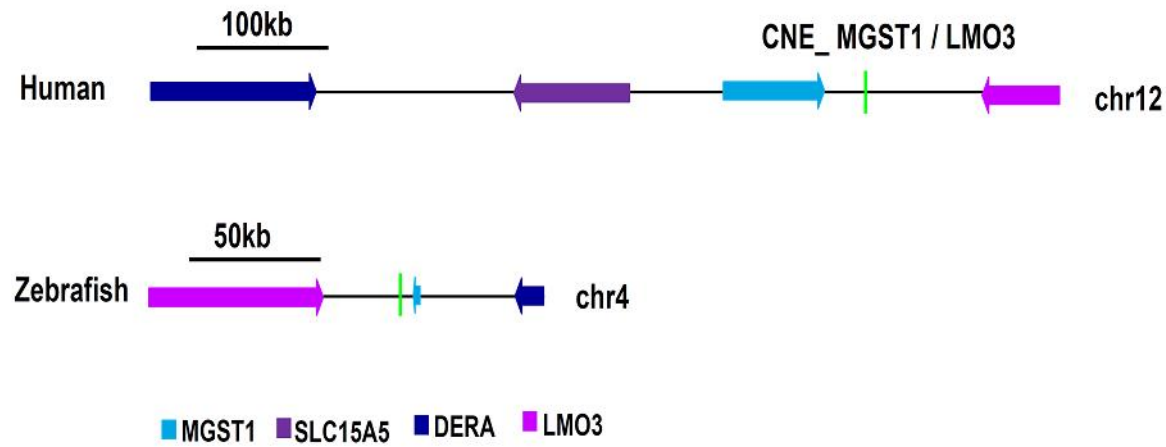

**Figure 30. Analysis of genic environment of human CNE-enhancers in teleost fish orthologous genomic intervals helps in identifying their target genes (hs595/hs607).**

Through Comparative genomic analysis of functionally defined CNE enhancers, across tetrapod-teleost lineages, cis regulatory networks of human genes are defined. **(A)** Not only the CNE but also its intronic location in *ADK*, conserved in both human and teleost lineages, suggests the link exists between CNE and *ADK* which is further confirmed by endogenous expression pattern analysis of both the CNE and the gene. **(B)** Conservation of *LMO3* and *MGST1* through out the vertebrate genome and endogenous expression pattern analysis of CNE matches with both these genes proposes them as target genes of CNE.

A

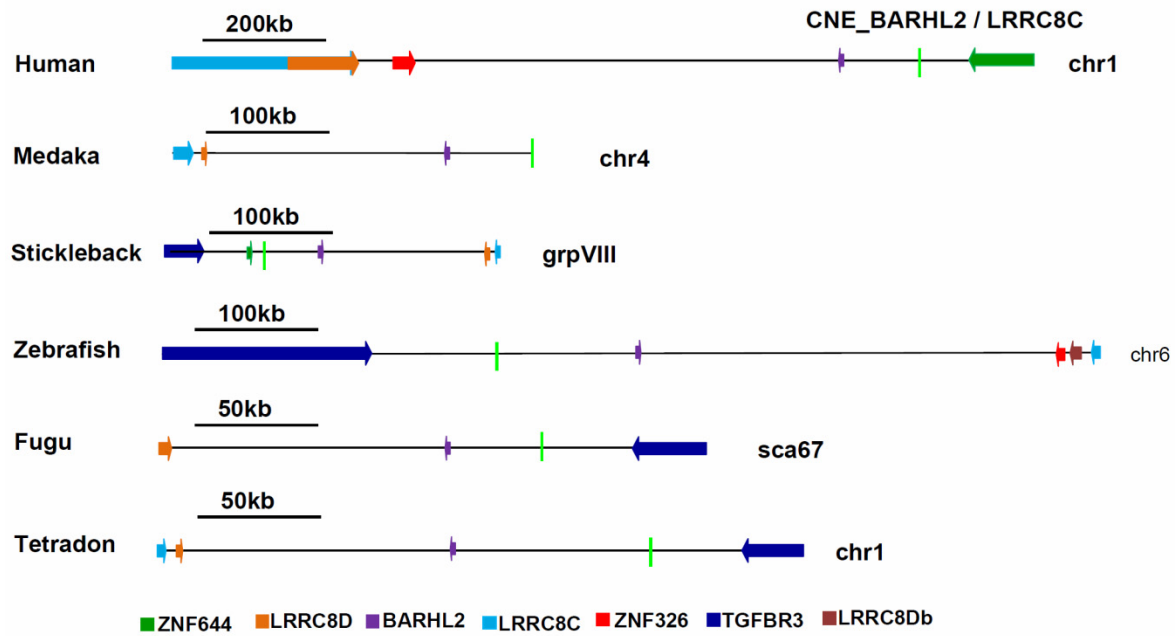

B

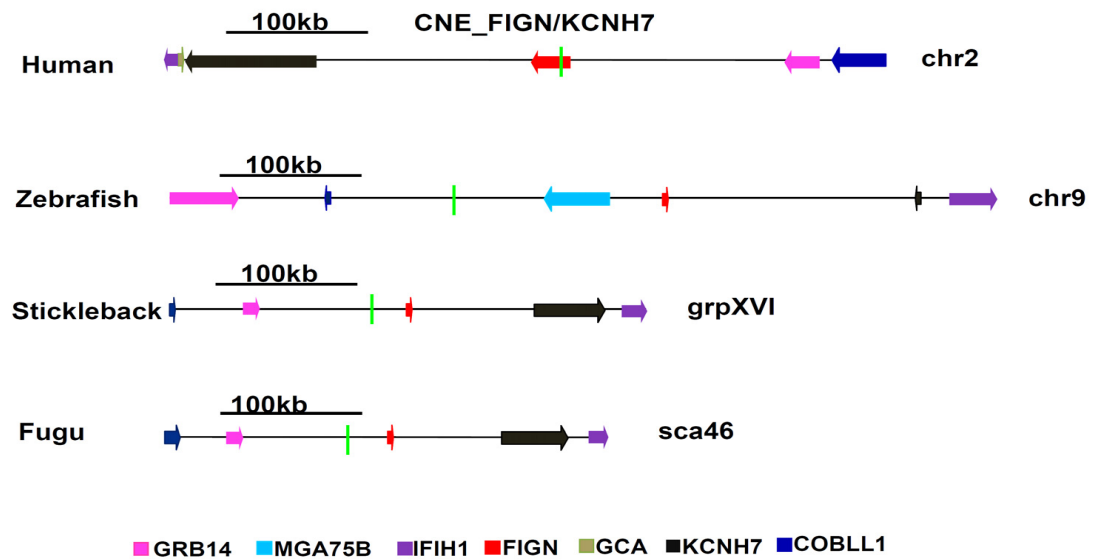

**Figure 31. Assigning the target genes to CNE-enhancers through comparative genomic analysis (hs612/hs640).**

Target genes of CNE enhancers are identified through orthology mapping in Human and teleost fishes. **(A)** Conservation of *LBARHL2* and *LRRC8C* through out the vertebrate genome and endogenous expression pattern analysis of CNE matches with both these genes proposes them as target genes of CNE. **(B)** Conservation of *FIGN* and *KCNH7* through out the vertebrate genome and endogenous expression pattern analysis of CNE matches with both these genes proposes them as target genes of CNE.

A

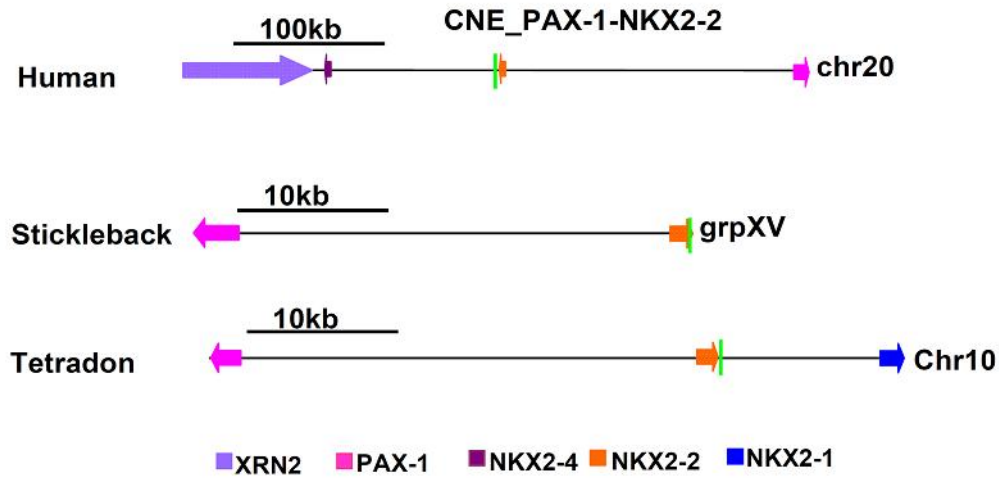

B

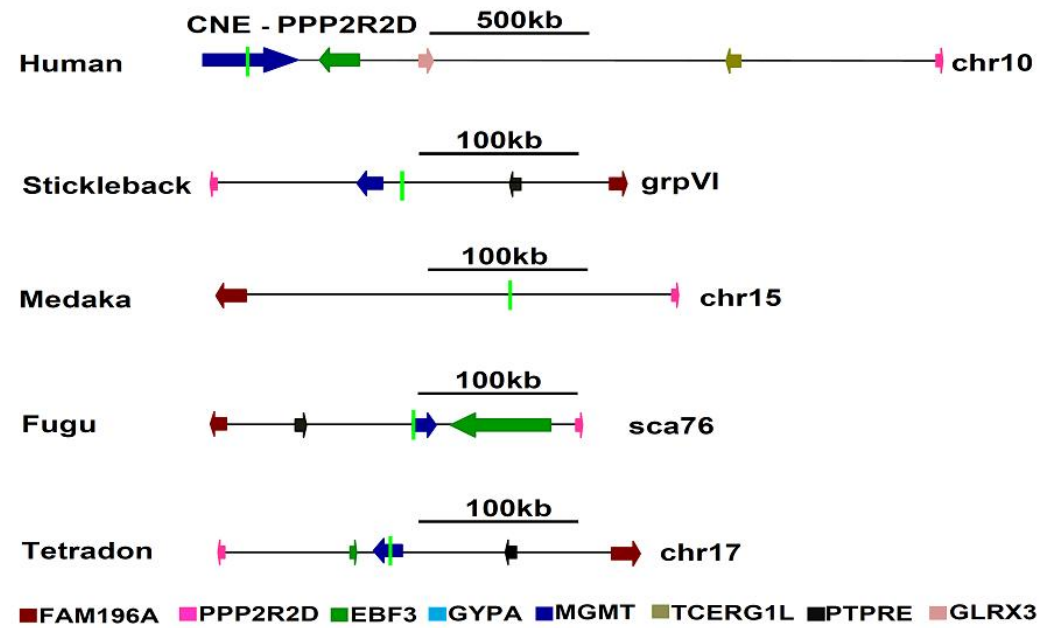

**Figure 32: Comparing the human-fish genic content and their reporter gene expression lead to association of CNE enhancers to their respective genes (hs1205/hs656).**

Systematic analysis of the surrounding region of CNE enhancers, conserved across the tetrapod-teleost lineages, carved a pathway to associate the CNE enhancer to its target genes. **(A)** Conservation of *PAX-1* and *NKX2-2* through out the vertebrate genome and endogenous expression pattern analysis of CNE matches with both these genes proposes them as target genes of CNE. **(B)** Analyses of expression pattern and conservation in tetrapod and fish lineages shows that CNE-enhancer is regulating the expression of *PPP2R2D*.



A

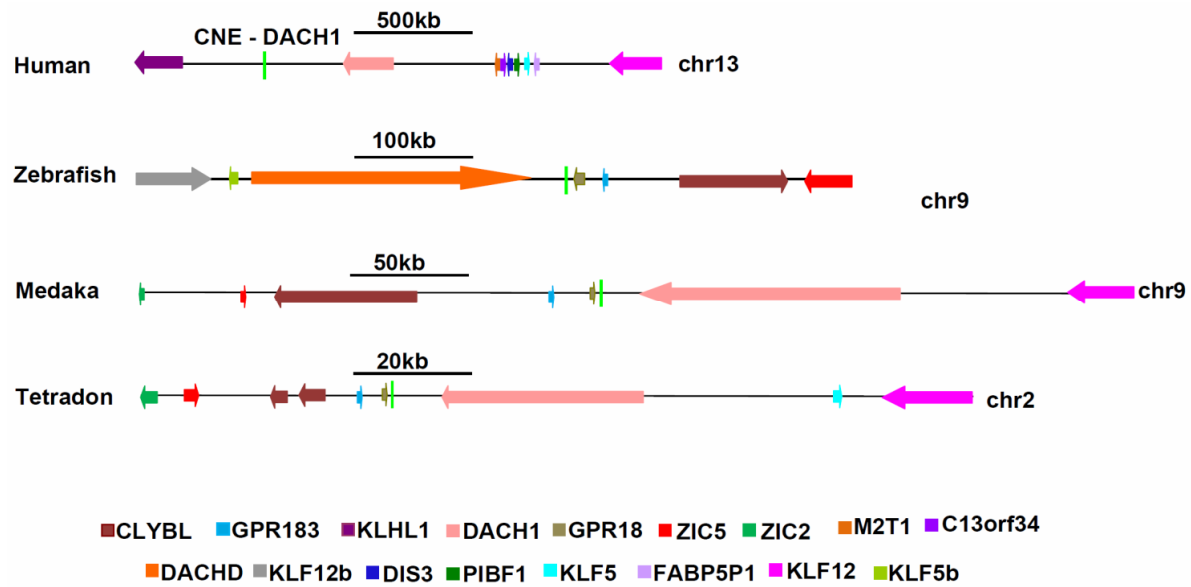

B

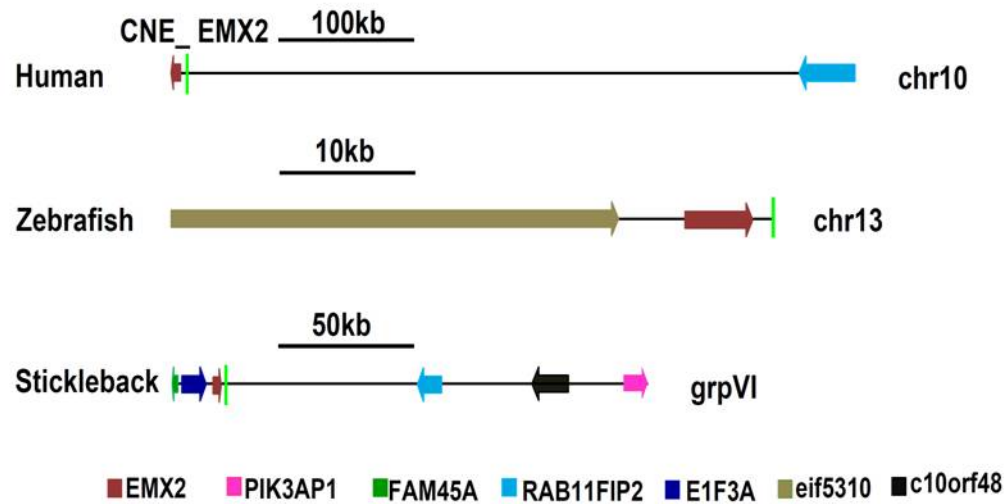

**Figure 33. Human CNE-enhancers by tracing the genic context of their orthologous copies in teleost fish lineage (hs540/hs672).**

Analysis of CNE-enhancers in humans and its orthologous genomic intervals teleost fish lineage helps in associating CNE to their target genes. **(A)** Analyses of expression pattern and conservation in tetrapod and fish lineages shows that CNE-enhancer is regulating the expression of *DACHI*. **(B)** Genic architecture analysis of the orthologous loci holding the CNE enhancers in vertebrate genome recommends the association of CNE with *EMX2*.

A

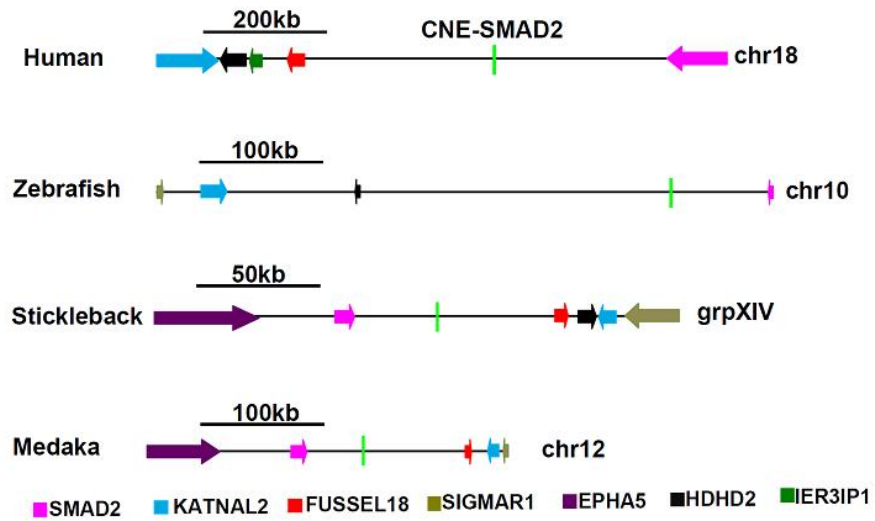

B

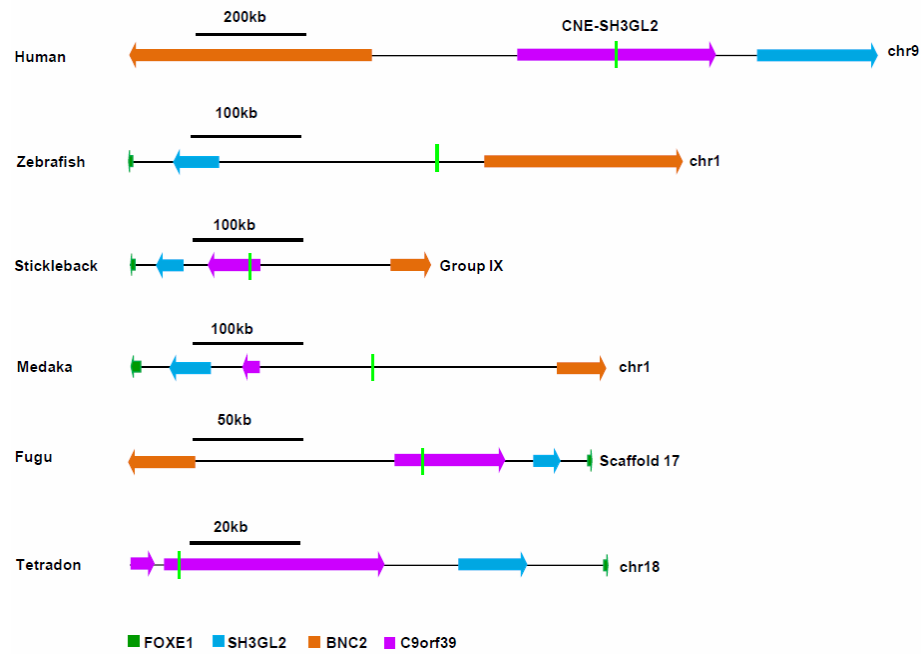

**Figure 34. Analysis of genic environment of human CNE-enhancers in teleost fish orthologous genomic intervals helps in identifying their target genes (hs679/hs529).**

Gene, controlled by specific regulatory elements, are identified through the systematic analysis of orthologous genomic content, which harbors functionally identified CNE enhancers, of tetrapod-teleost lineages. **(A)** CNE residing between *FUSSEL18* and *SMAD2* in humans is also conserved along with *SMAD2*, with differential loss and gain of bystander genes, in teleost fishes. Comparison of reporter gene expression of CNE enhancer and *SMAD2* also confers *SMAD2* as target gene of CNE. **(B)** By tracing the genomic content around the CNE in tetrapod and fish lineages it becomes evident that the CNE is regulatory element of *SH3GL2*. Redundant expression pattern of the gene and CNE is also in accordance with each other.

A

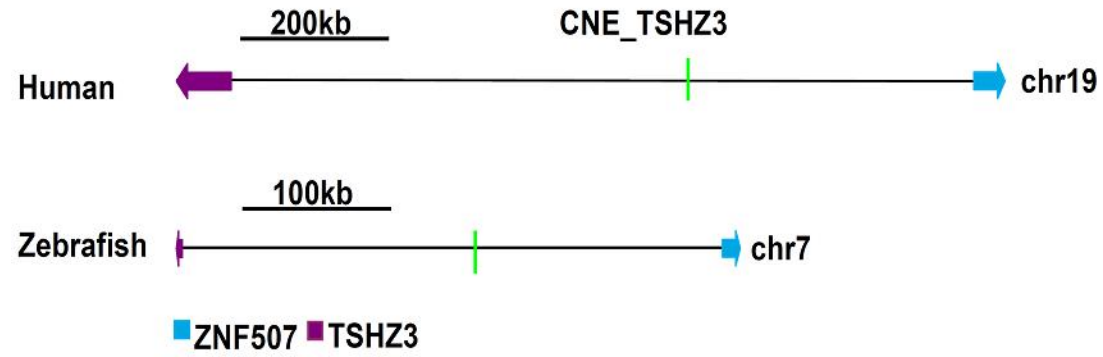

B

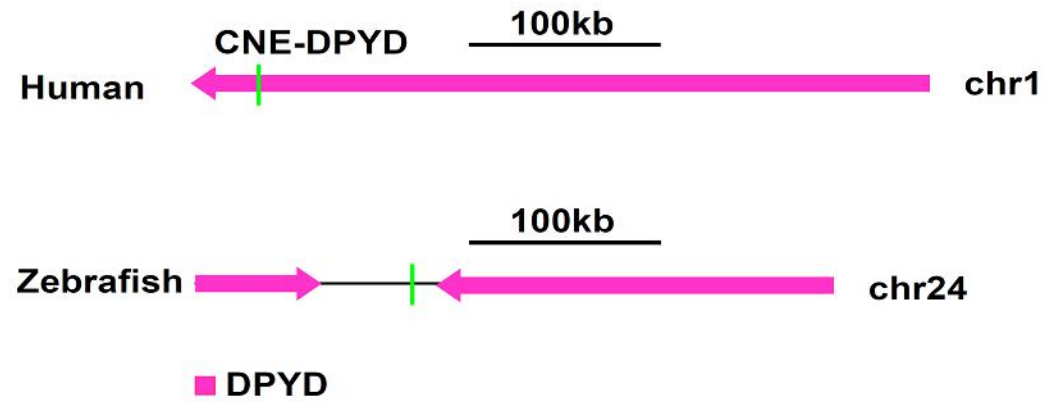

**Figure 35. Assigning the target genes to CNE-enhancers through comparative genomic analysis (hs536/hs671).**

Through Comparative genomic analysis of functionally defined CNE enhancers, across tetrapod-teleost lineages, cis regulatory networks of human genes are defined. **(A)** By tracing the genomic content around the CNE in tetrapod and fish lineages it becomes evident that the CNE is regulatory element of *TSHZ3*. Redundant expression pattern of the gene and CNE is also in accordance with each other. **(B)** Analyses of expression pattern and conservation in tetrapod and fish lineages shows that CNE-enhancer is regulating the expression of *DPYD*.

A

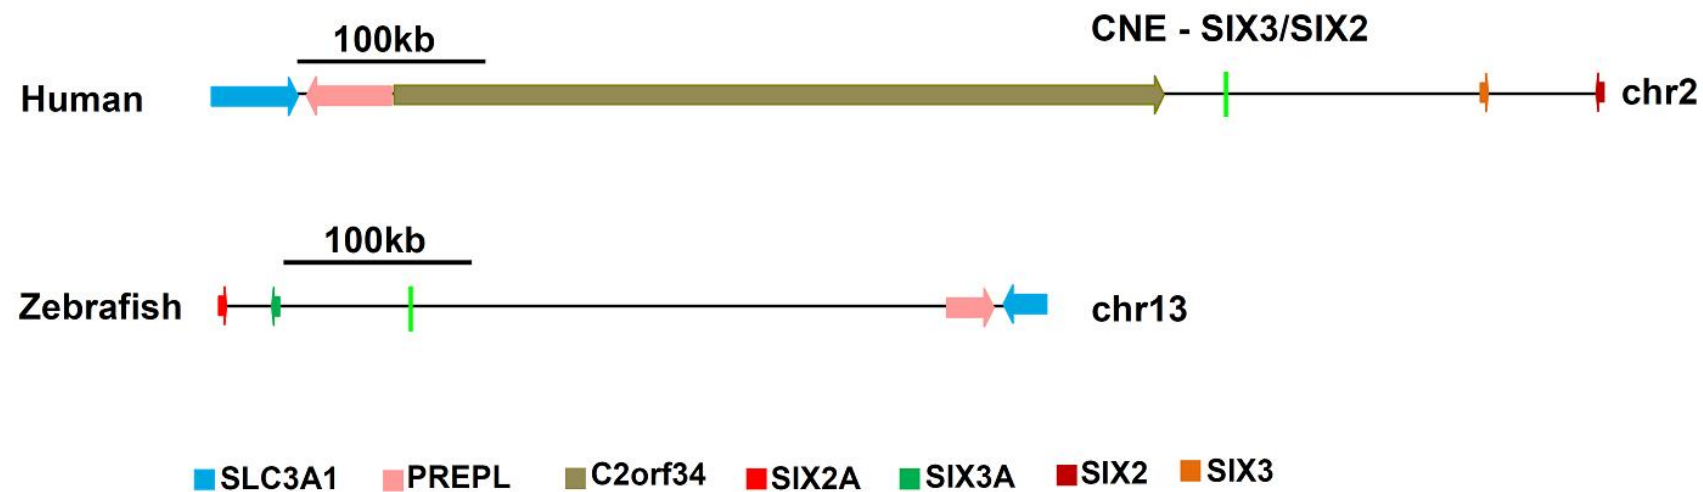

B

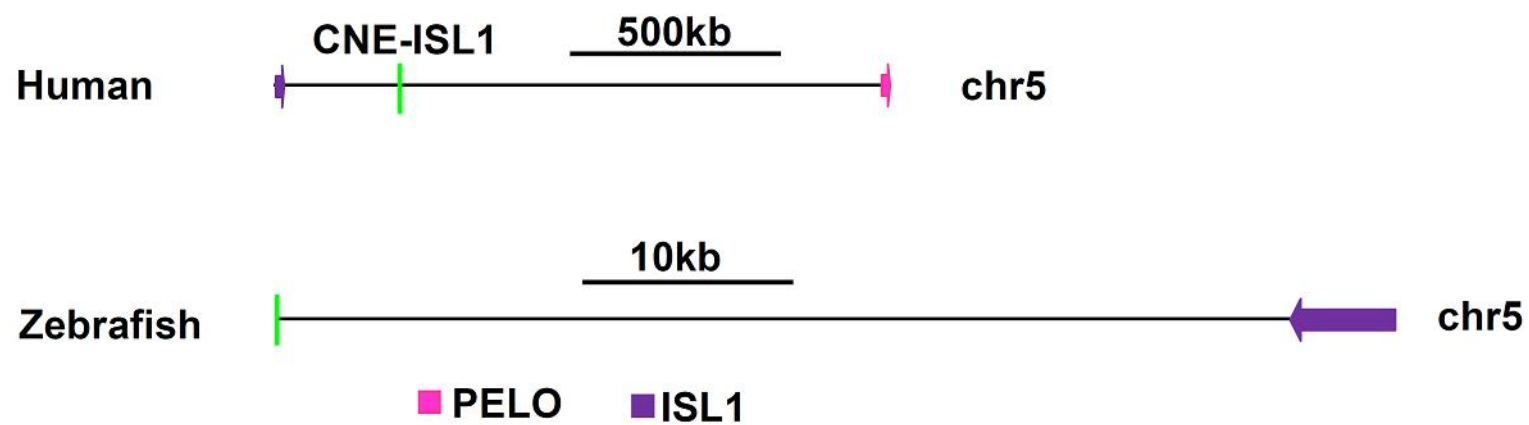

**Figure 36. Comparing the human-fish genic content and their reporter gene expression lead to association of CNE enhancers to their respective genes (hs541/hs543).**

Target genes of CNE enhancers are identified through orthology mapping in Human and teleost fishes. **(A)** Conservation of *SIX2* and *SIX3* through out the vertebrate genome and endogenous expression pattern analysis of CNE matches with both these genes proposes them as target genes of CNE. **(B)** Genic architecture analysis of the orthologous loci holding the CNE enhancers in vertebrate genome recommends the association of CNE with *ISL1*.



A

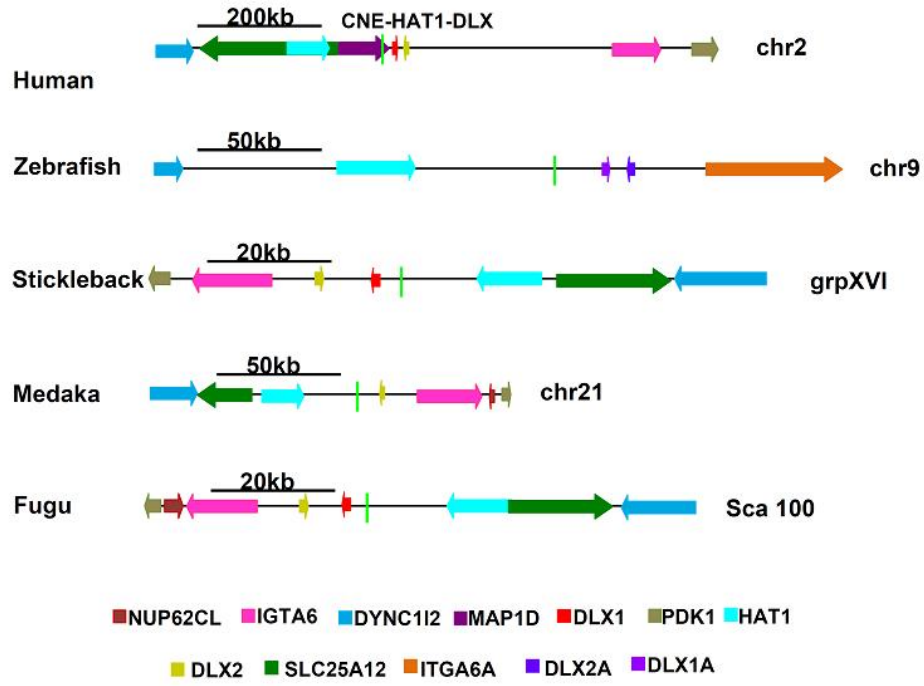

B

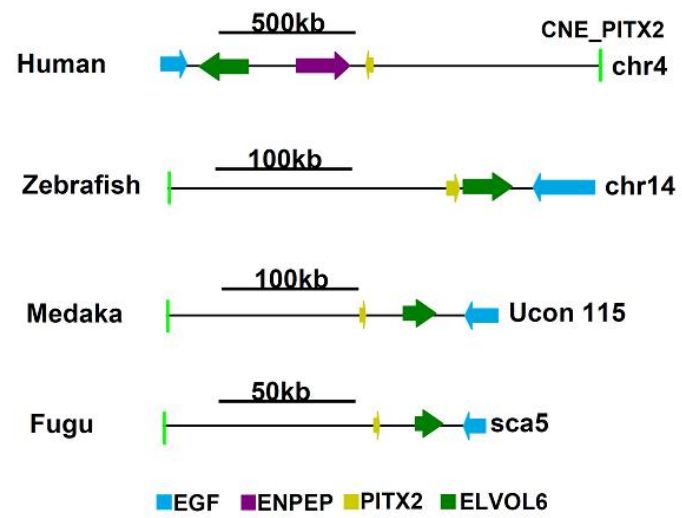

**Figure 37. Human CNE-enhancers by tracing the genic context of their orthologous copies in teleost fish lineage (hs553/hs559).**

Analysis of CNE-enhancers in humans and its orthologous genomic intervals teleost fish lineage helps in associating CNE to their target genes. **(A)** Conservation of *HATI* and *DLX* through out the vertebrate genome and endogenous expression pattern analysis of CNE matches with both these genes proposes them as target genes of CNE. **(B)** Analysis of expression pattern and conservation in tetrapod and fish lineages shows that CNE-enhancer is regulating the expression of *PITX2*.

A

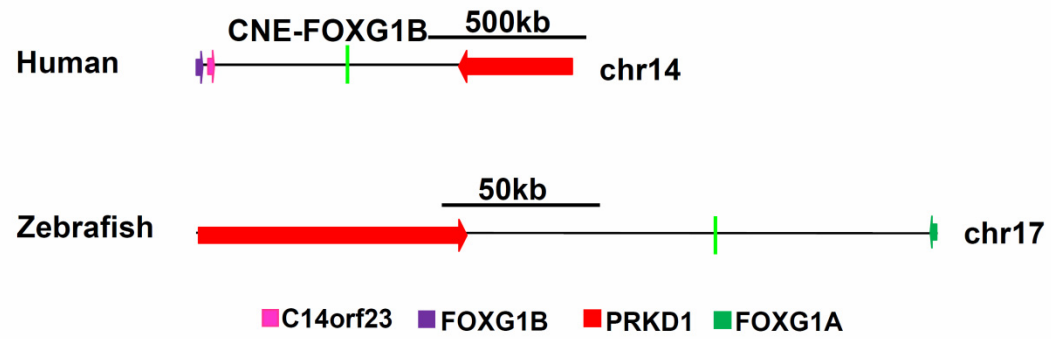

B

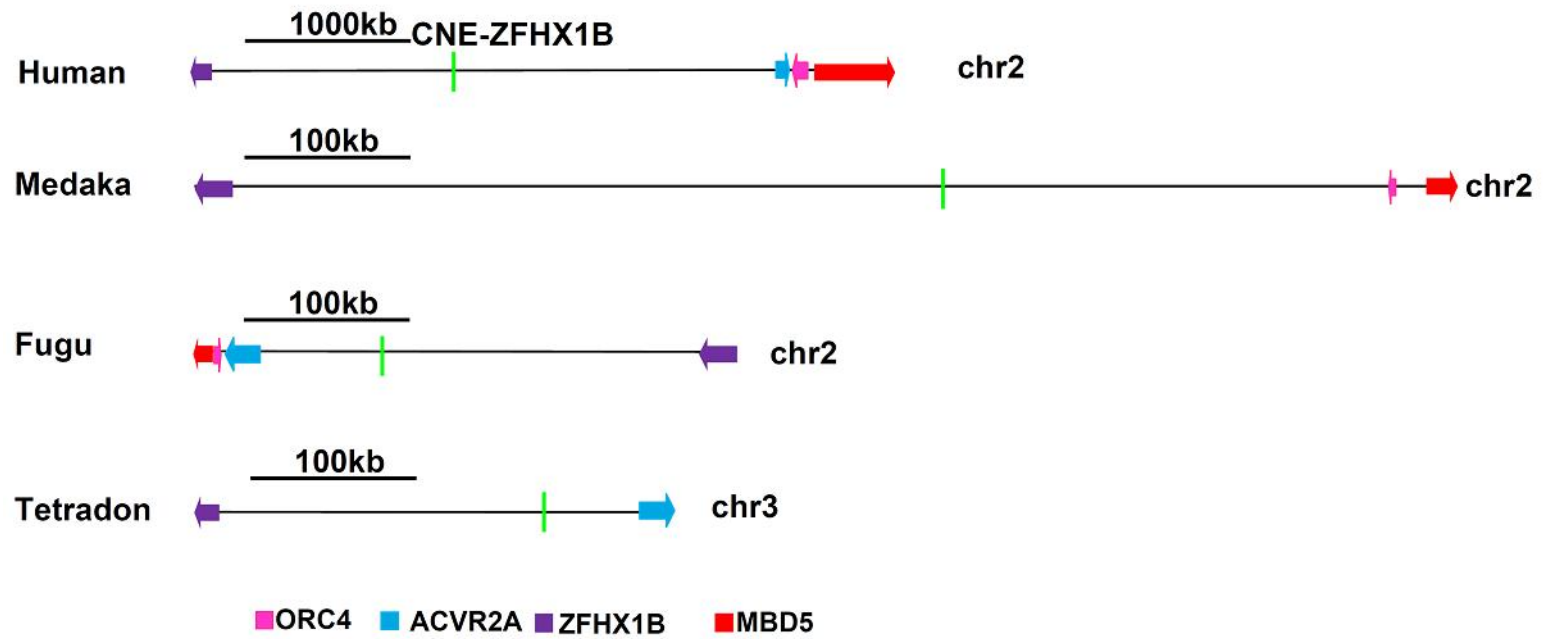

**Figure 38. Analysis of genic environment of human CNE-enhancers in teleost fish orthologous genomic intervals helps in identifying their target genes (hs566/hs568).**

Systematic analysis of the surrounding region of CNE enhancers, conserved across the tetrapod-teleost lineages, carved a pathway to associate the CNE enhancer to its target genes. **(A)** By tracing the genomic content around the CNE in tetrapod and fish lineages it becomes evident that the CNE is regulatory element of *FOXP1B*. Redundant expression pattern of the gene and CNE is also in accordance with each other. **(B)** Analysis of expression pattern and conservation in tetrapod and fish lineages shows that CNE-enhancer is regulating the expression of *ZFHX1B*.

A

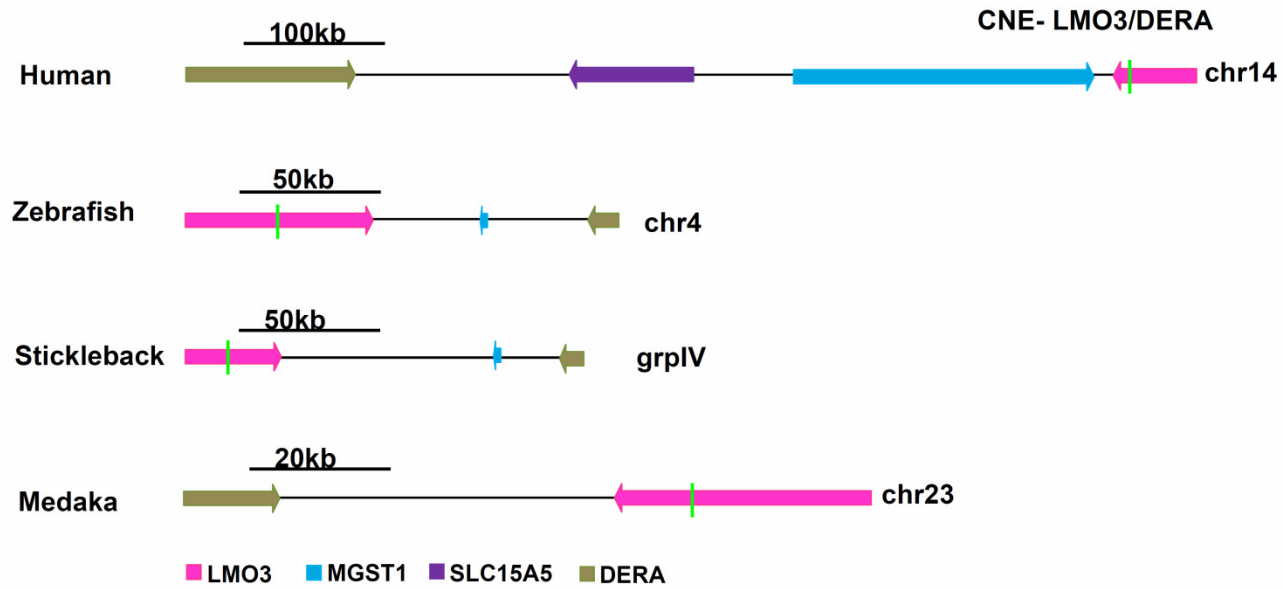

B

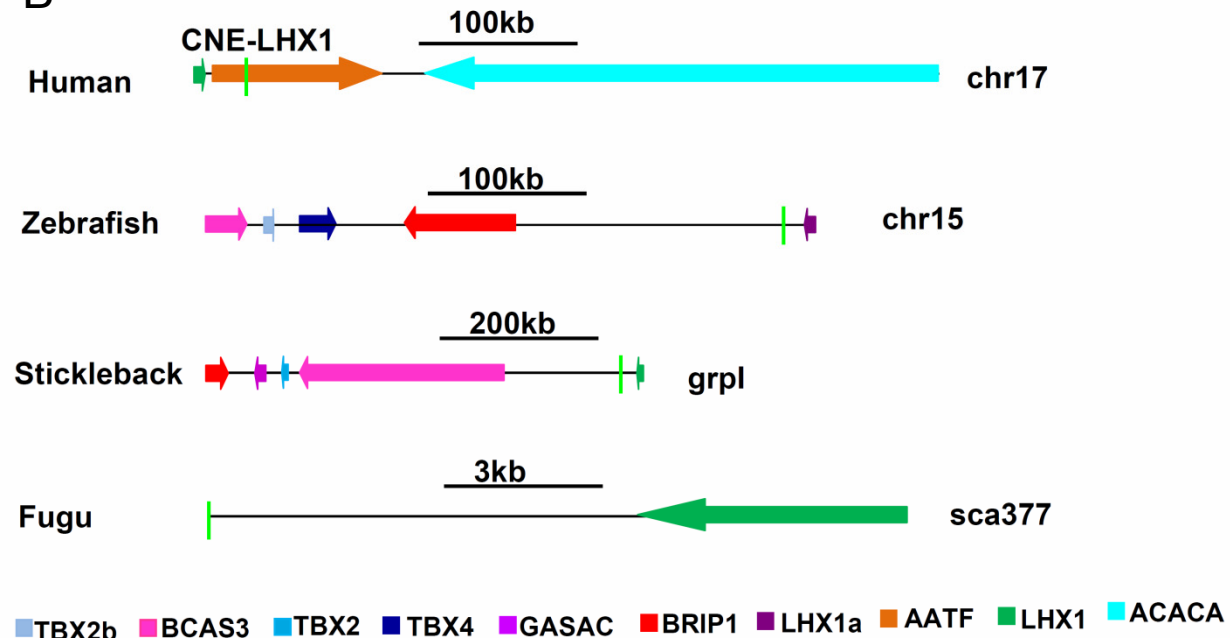

**Figure 39. Assigning the target genes to CNE-enhancers through comparative genomic analysis (hs336 /hs363).**

Gene, controlled by specific regulatory elements, are identified through the systematic analysis of orthologous genomic content, which harbors functionally identified CNE enhancers, of tetrapod-teleost lineages. **(A)** Conservation of *LMO3* and *DERA* through out the vertebrate genome and endogenous expression pattern analysis of CNE matches with both these genes proposes them as target genes of CNE. **(B)** By tracing the genomic content around the CNE in tetrapod and fish lineages it becomes evident that the CNE is regulatory element of *LHX1*. Redundant expression pattern of the gene and CNE is also in accordance with each other.

# A

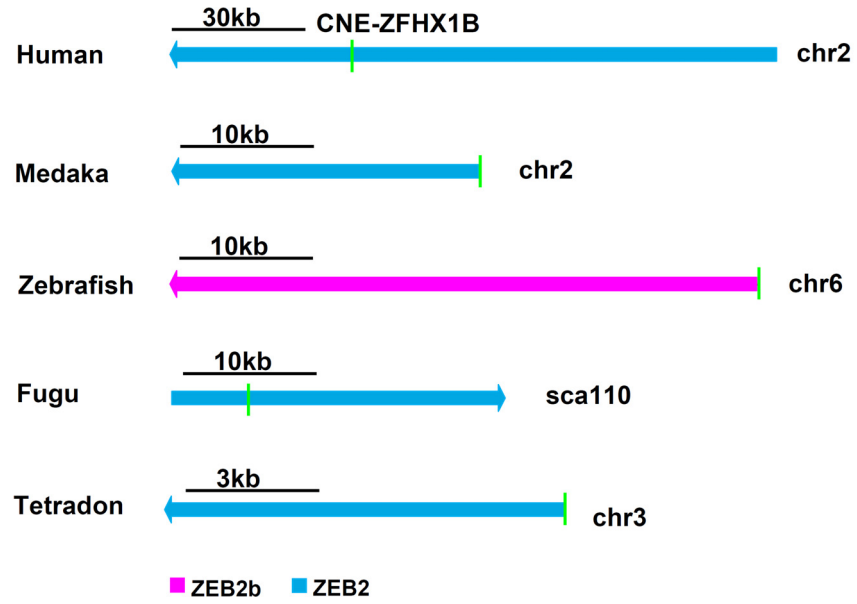

# B

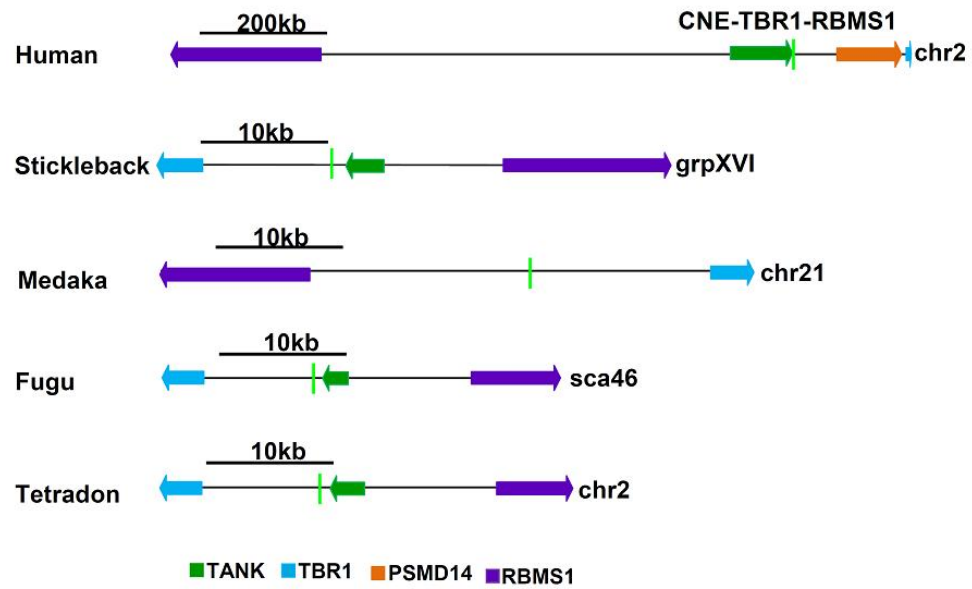

**Figure 40. Comparing the human-fish genic content and their reporter gene expression lead to association of CNE enhancers to their respective genes (hs407/hs416).**

Through Comparative genomic analysis of functionally defined CNE enhancers, across tetrapod-teleost lineages, cis regulatory networks of human genes are defined. **(A)** Analysis of expression pattern and conservation in tetrapod and fish lineages shows that CNE-enhancer is regulating the expression of *ZFH1B*. **(B)** Conservation of *TBRI* and *RBMS1* through out the vertebrate genome and endogenous expression pattern analysis of CNE matches with both these genes proposes them as target genes of CNE.



A

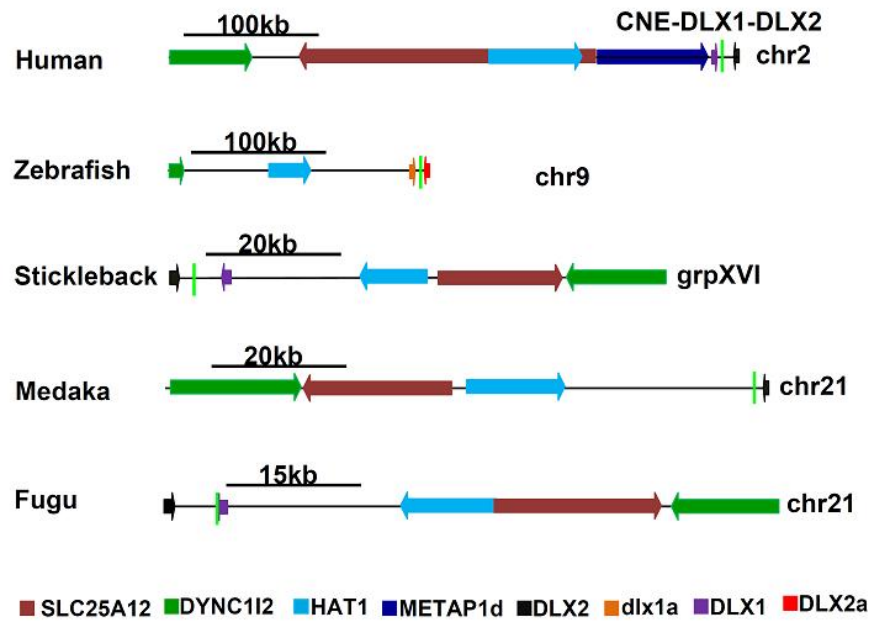

B

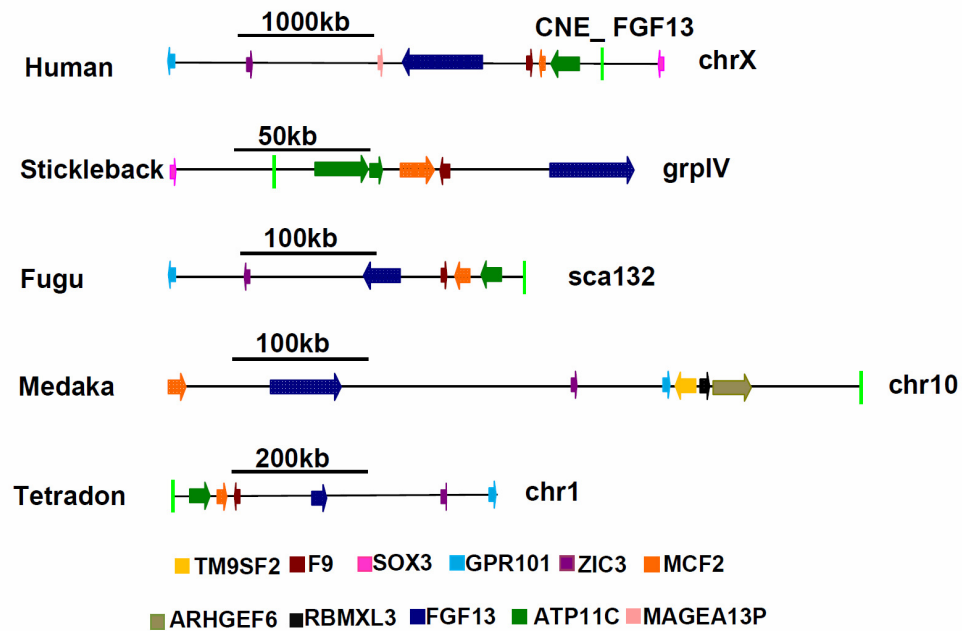

**Figure 41. Human CNE-enhancers by tracing the genic context of their orthologous copies in teleost fish lineage (hs422/hs427).**

Analysis of CNE-enhancers in humans and its orthologous genomic intervals teleost fish lineage helps in associating CNE to their target genes. **(A)** Conservation of *DLX1* and *DLX2* through out the vertebrate genome and endogenous expression pattern analysis of CNE matches with both these genes proposes them as target genes of CNE. **(B)** Genic architecture analysis of the orthologous loci holding the CNE enhancers in vertebrate genome recommends the association of CNE with *FGF13*.

A

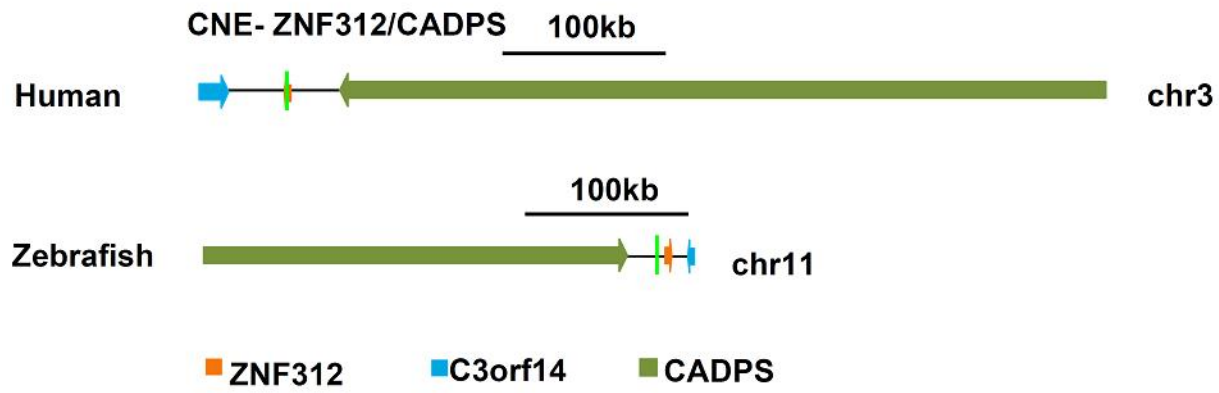

B

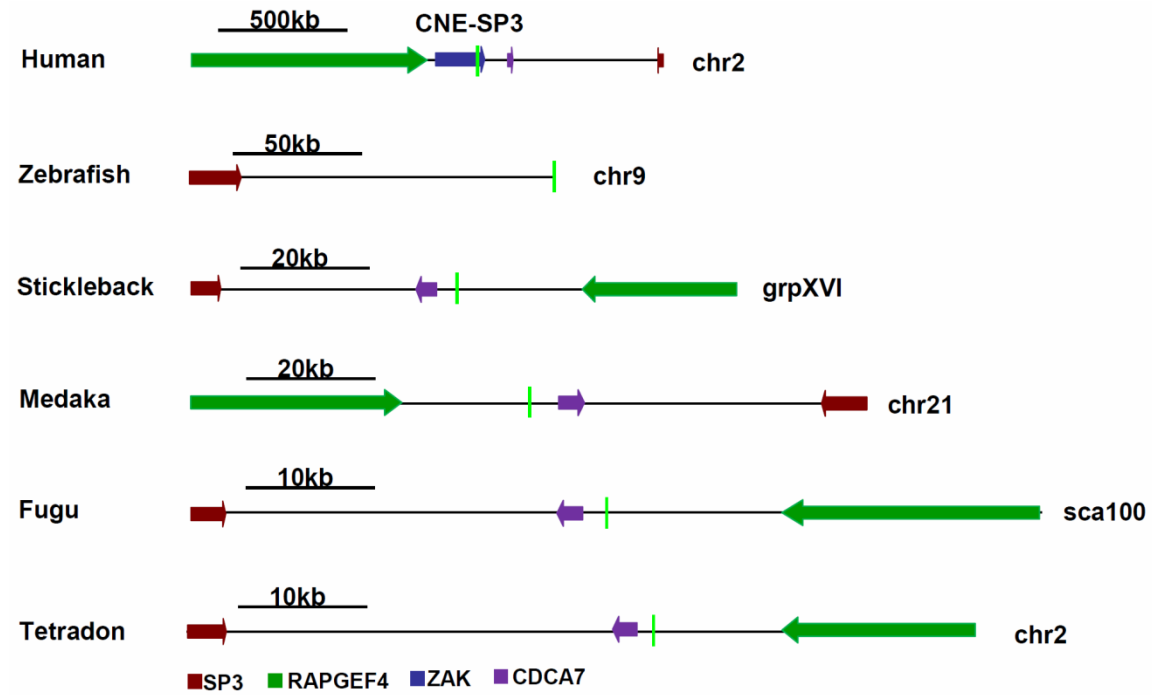

**Figure 42. Analysis of genic environment of human CNE-enhancers in teleost fish orthologous genomic intervals helps in identifying their target genes (hs435/hs242).**

Systematic analysis of the surrounding region of CNE enhancers, conserved across the tetrapod-teleost lineages, carved a pathway to associate the CNE enhancer to its target genes. **(A)** Conservation of *ZNF312* and *CADPS* through out the vertebrate genome and endogenous expression pattern analysis of CNE matches with both these genes proposes them as target genes of CNE. **(B)** Analysis of expression pattern and conservation in tetrapod and fish lineages shows that CNE-enhancer is regulating the expression of *SP3*.

A

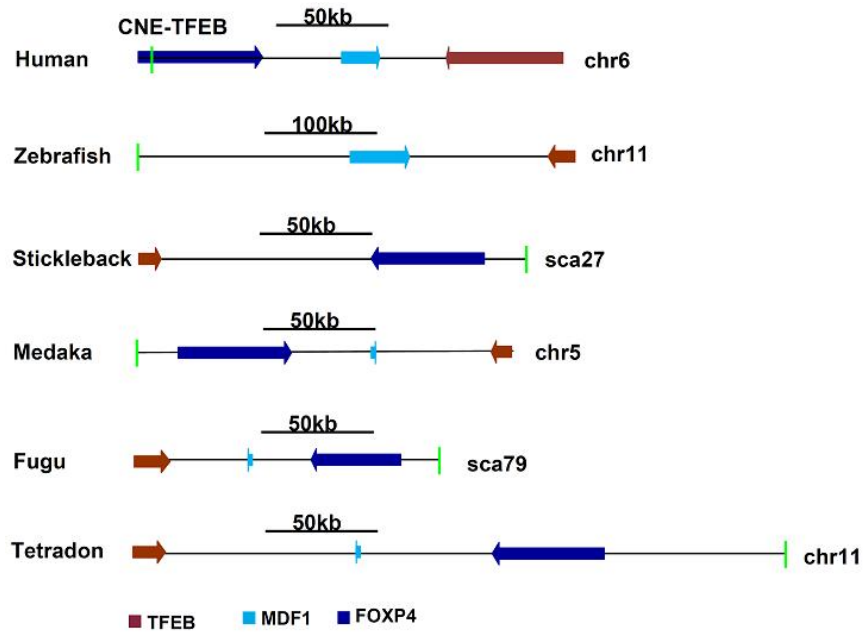

B

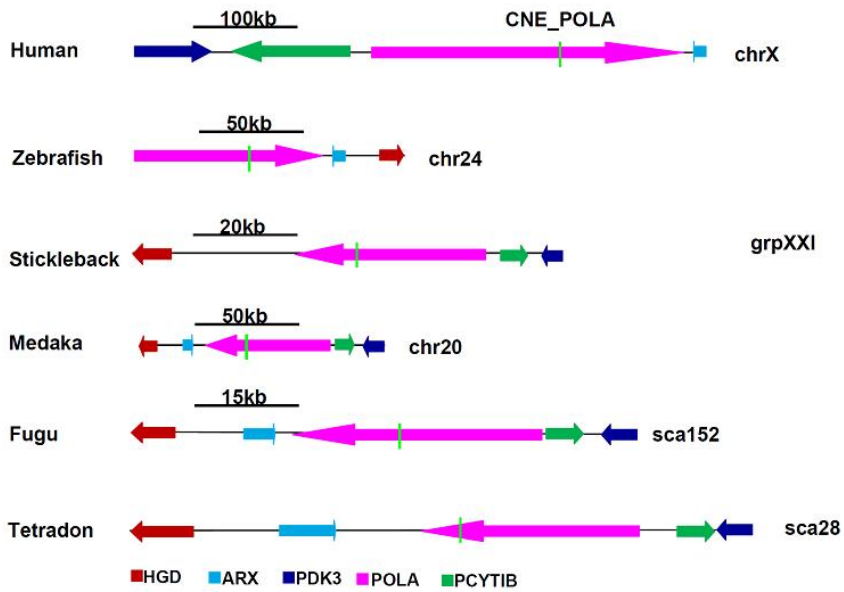

**Figure 43. Assigning the target genes to CNE-enhancers through comparative genomic analysis (hs281/hs118).**

Gene, controlled by specific regulatory elements, are identified through the systematic analysis of orthologous genomic content, which harbors functionally identified CNE enhancers, of tetrapod-teleost lineages. **(A)** Genic architecture analysis of the orthologous loci holding the CNE enhancers in vertebrate genome recommends the association of CNE with *TFEB*. **(B)** By tracing the genomic content around the CNE in tetrapod and fish lineages it becomes evident that the CNE is regulatory element of *POLA*. Redundant expression pattern of the gene and CNE is also in accordance with each other.

A

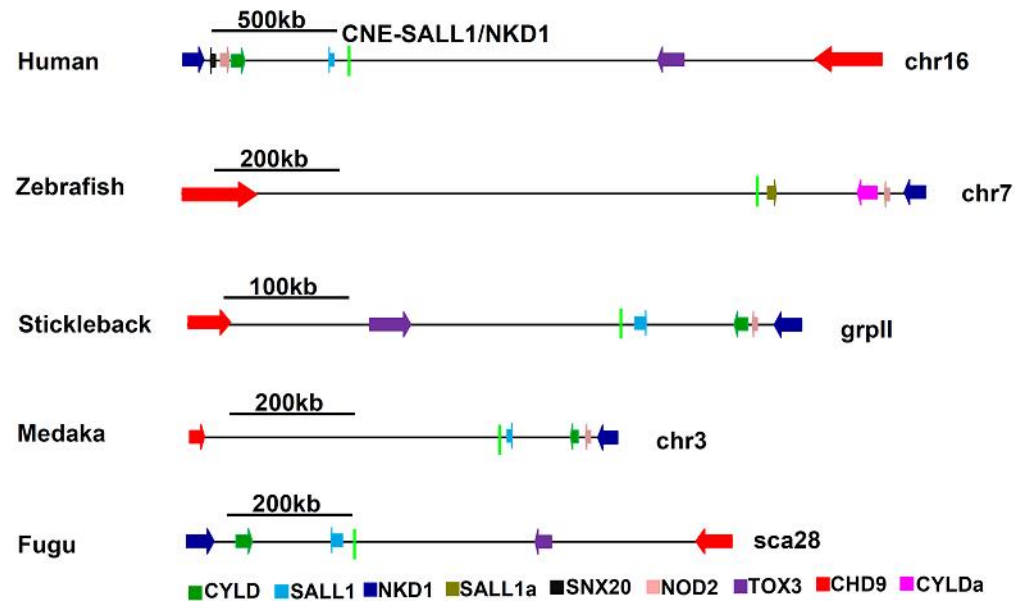

B

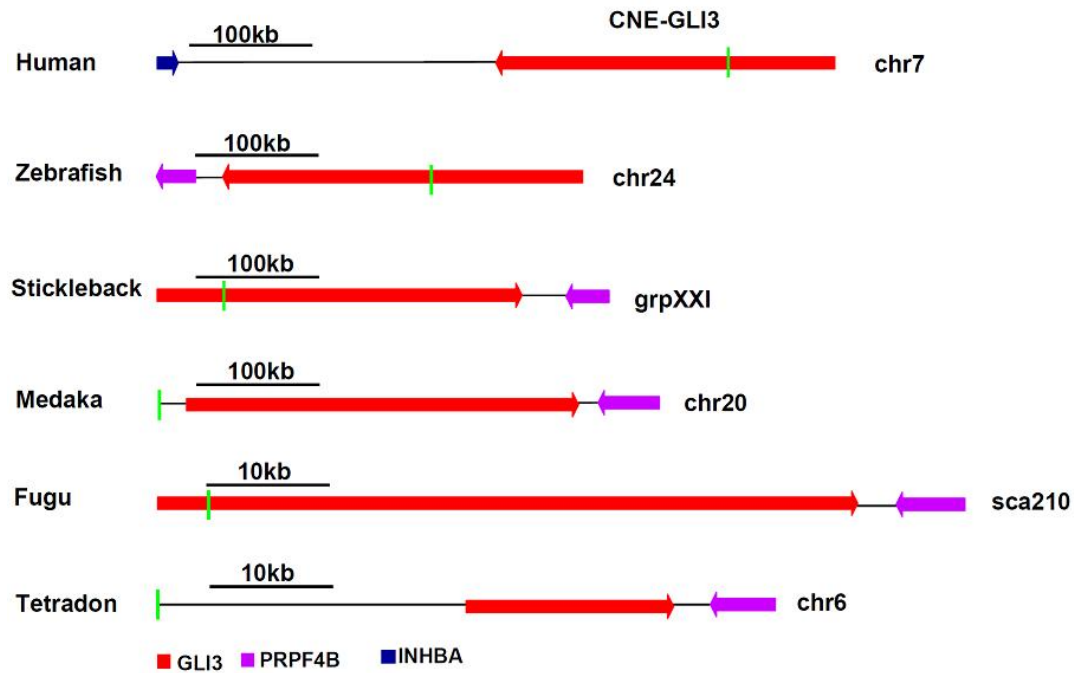

**Figure 44. Comparing the human-fish genic content and their reporter gene expression lead to association of CNE enhancers to their respective genes (hs76/hs111).**

Through Comparative genomic analysis of functionally defined CNE enhancers, across tetrapod-teleost lineages, cis regulatory networks of human genes are defined. **(A)** Conservation of *SALL1* and *NKDI* through out the vertebrate genome and endogenous expression pattern analysis of CNE matches with both these genes proposes them as target genes of CNE. **(B)** Analysis of expression pattern and conservation in tetrapod and fish lineages shows that CNE-enhancer is regulating the expression of *GLI3*.



A

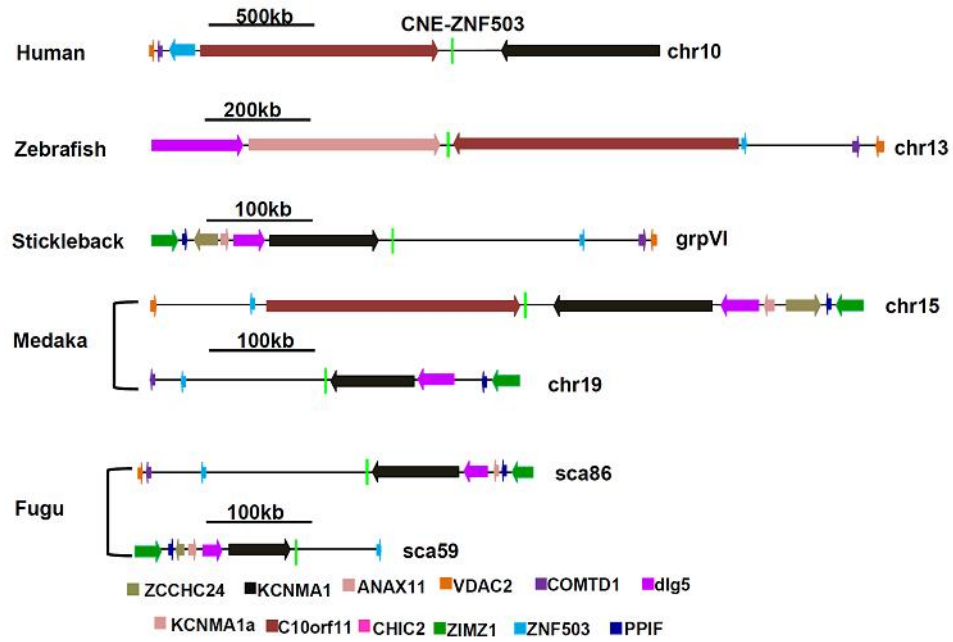

B

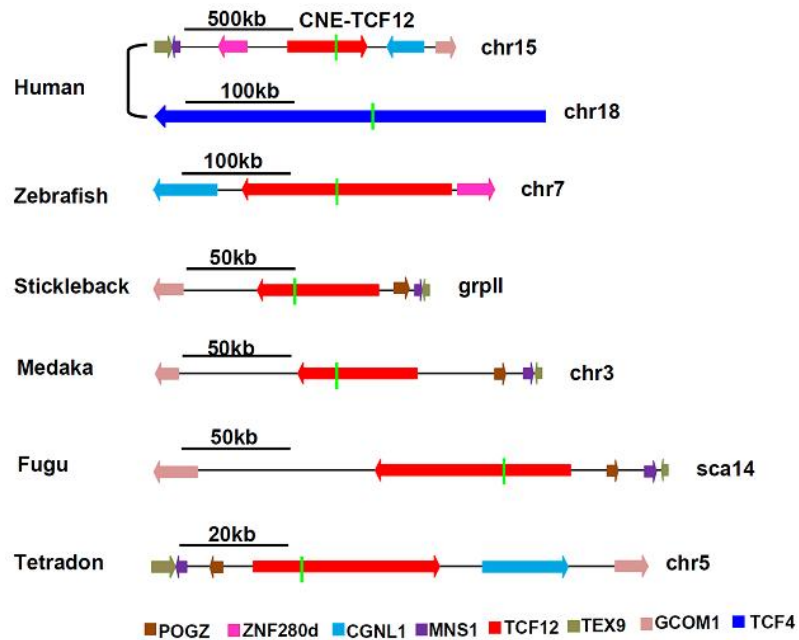

**Figure 45. Predicting the target genes of human enhancers by analyzing their genic environment within and across vertebrate genomes (hs484/hs357).**

Analysis of CNE-enhancers in humans and its orthologous genomic intervals teleost fish lineage helps in associating CNE to their target genes. **(A)** Analysis of expression pattern and conservation in tetrapod and fish lineages shows that CNE-enhancer is regulating the expression of *ZNF503*. Conservation of duplicated copy of this gene along with the CNE in fishes verifies this suggestion. **(B)** Duplication event of the CNE occurred only in humans and the gene entangled with the CNE, in duplicated copy, is TCF. Genic architecture analysis of the orthologous and paralogous loci holding the CNE enhancers in vertebrate genome recommends the association of CNE with *TCF12*.

A

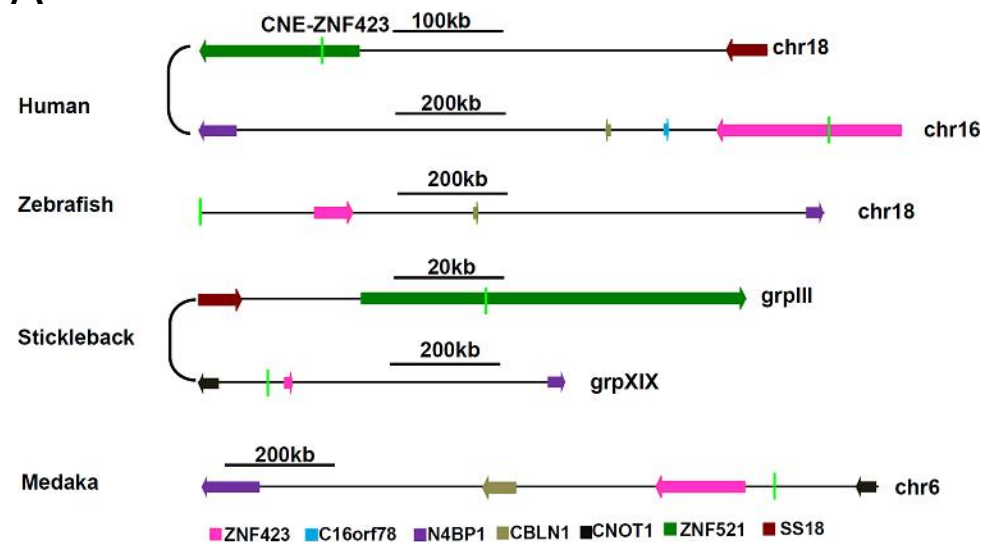

B

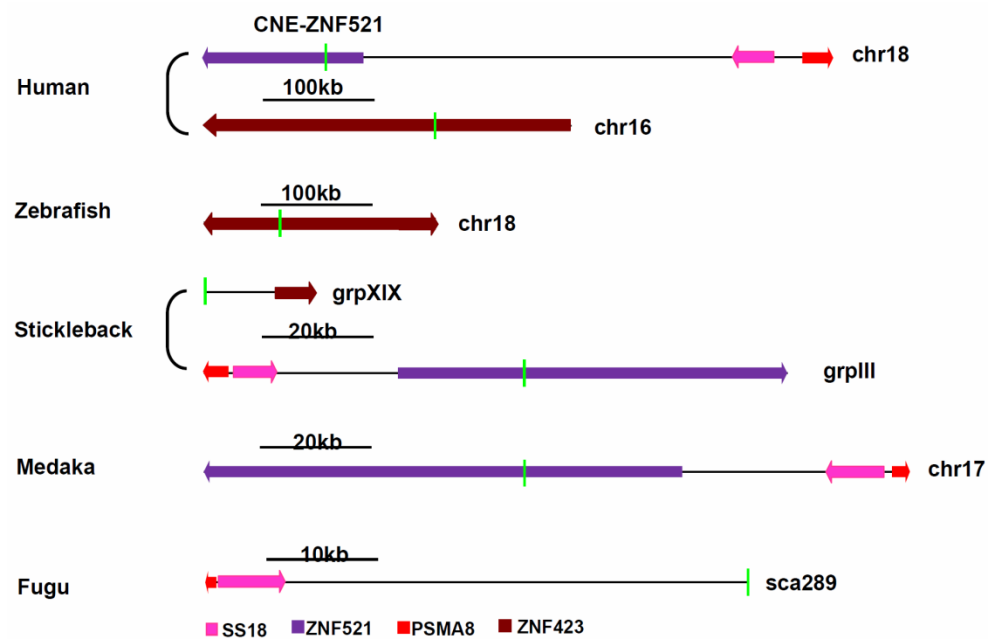

**Figure 46. Human CNE-enhancers by tracing the genic context of their orthologous copies in teleost fish lineage (hs625 /hs369).**

Systematic analysis of the surrounding region of CNE enhancers, conserved across the tetrapod-teleost lineages, carved a pathway to associate the CNE enhancer to its target genes. **(A)** Duplication is occurred in both human and fish lineages. Careful analysis of genic context of orthologous regions of this element in teleost fish and its duplicated paralogous copy in human and fishes suggests the association of this enhancer with *ZNF423*. **(B)** Duplication is occurred in both human and fish lineages. Careful analysis of genic context of orthologous regions of this element in teleost fish and its duplicated paralogous copy in human and fishes suggests the association of this enhancer with *ZNF521*.

A

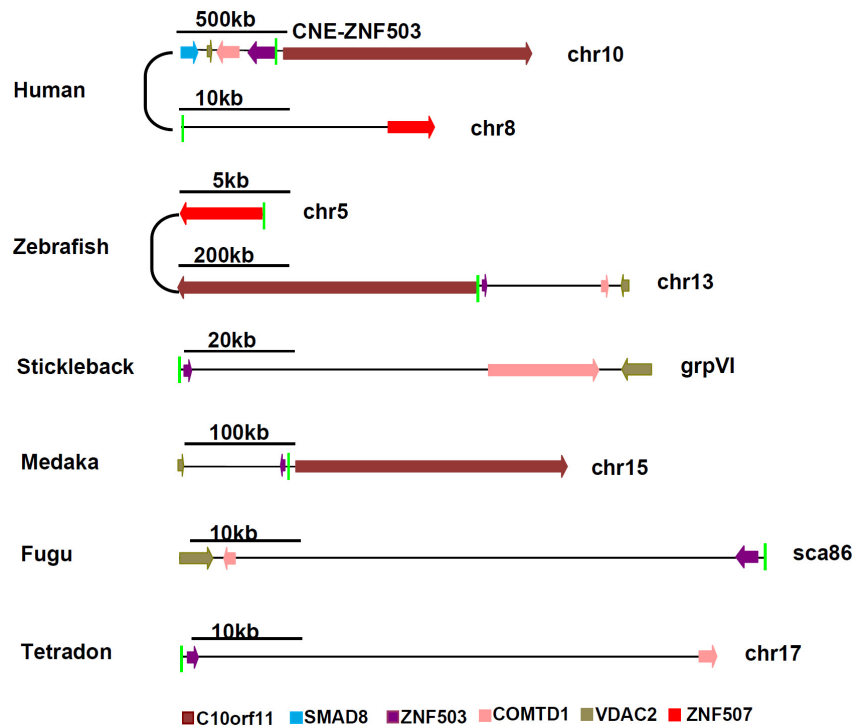

B

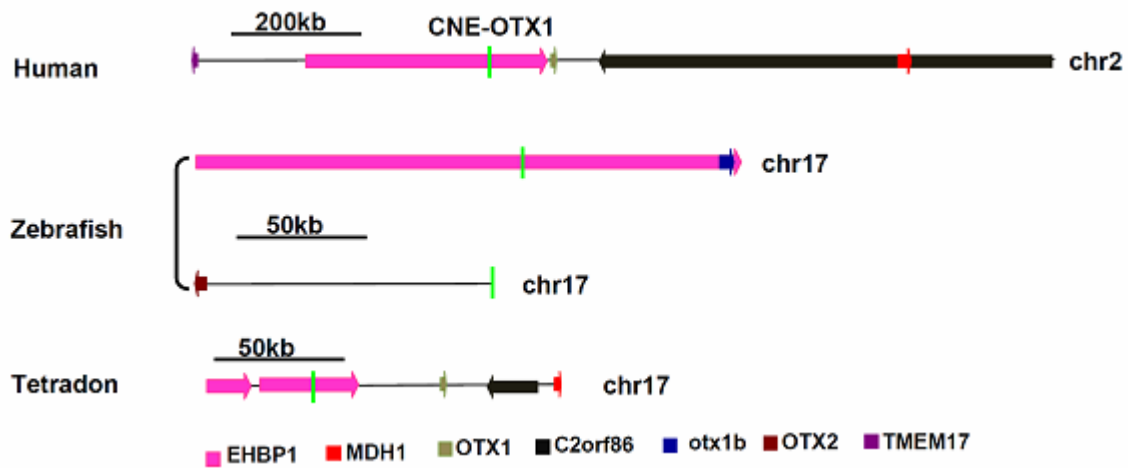

**Figure 47. Predicting the target genes of human enhancers by analyzing their genic environment within and across vertebrate genomes (hs320/hs690).**

Gene, controlled by specific regulatory elements, are identified through the systematic analysis of orthologous genomic content, which harbors functionally identified CNE enhancers, of tetrapod-teleost lineages. **(A)** Analysis of expression pattern and conservation in tetrapod and fish lineages shows that CNE-enhancer is regulating the expression of *ZNF503*. Conservation of duplicated copy of this gene along with the CNE in fishes verifies this suggestion. **(B)** Duplication is occurred in only in teleost fishes , and the gene entangled with the CNE, in duplicated copy, is *OTX1*. Genic architecture analysis of the orthologous and paralogous loci holding the CNE enhancers in vertebrate genome recommends the association of CNE with *OTX1*.

A

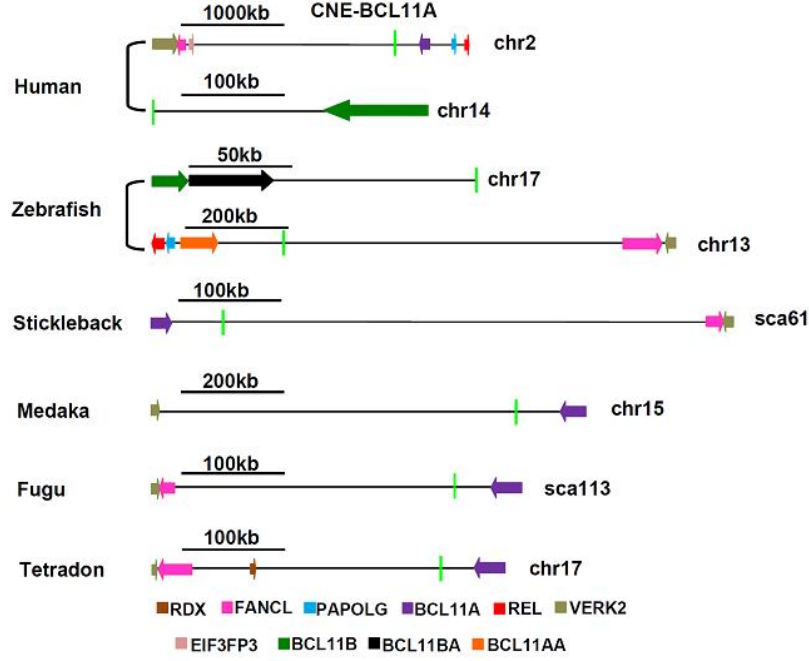

B

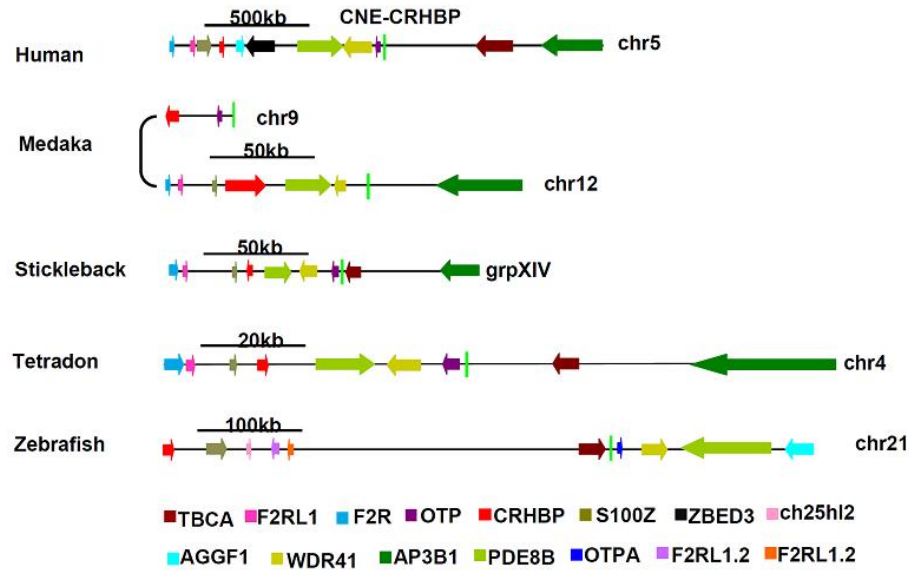

**Figure 48. Assigning the target genes to CNE-enhancers through comparative genomic analysis (hs399/hs262).**

Through Comparative genomic analysis of functionally defined CNE enhancers, across tetrapod-teleost lineages, cis regulatory networks of human genes are defined. **(A)** Duplication is occurred in both human and fish lineages. Careful analysis of genic context of orthologous regions of this element in teleost fish and its duplicated paralogous copy in human and fishes suggests the association of this enhancer with *BCL11A*. **(B)** Duplication is occurred in fishes. Careful analysis of genic context of orthologous regions of this element in teleost fish and its duplicated paralogous copy in human and fishes suggests the association of this enhancer with *CRHBP*.



A

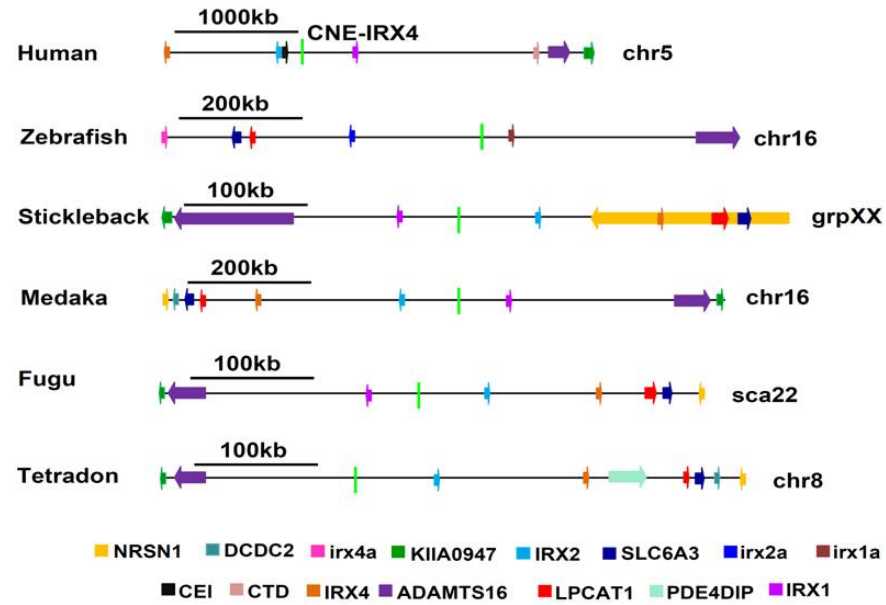

B

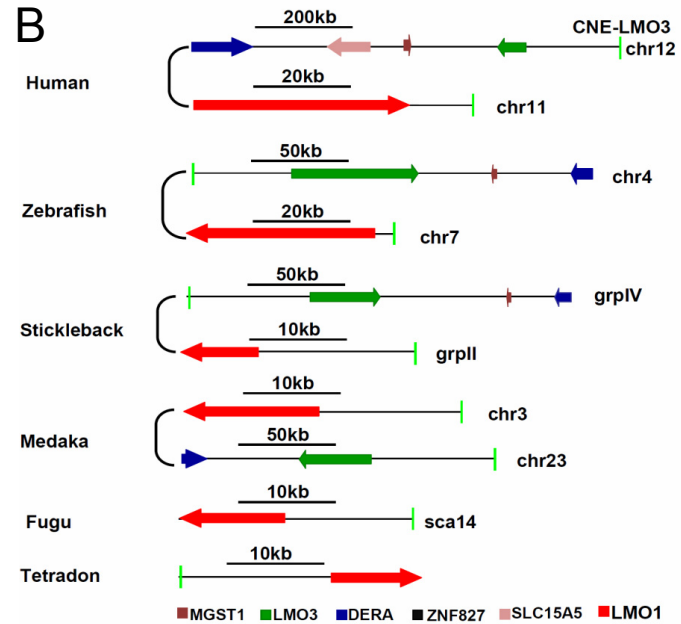

**Figure 49. Predicting the target genes of human enhancers by analyzing their genic environment within and across vertebrate genomes (hs754/hs661).**

Gene, controlled by specific regulatory elements, are identified through the systematic analysis of orthologous genomic content, which harbors functionally identified CNE enhancers, of tetrapod-teleost lineages. **(A)** Analysis of expression pattern and conservation in tetrapod and fish lineages shows that CNE-enhancer is regulating the expression of *IRX4*. Conservation of duplicated copy of this gene along with the CNE in fishes verifies this suggestion. **(B)** Duplication is occurred in both human and teleost fishes, and the gene entangled with the CNE, in duplicated copy, is *LMO3*. Genic architecture analysis of the orthologous and paralogous loci holding the CNE enhancers in vertebrate genome recommends the association of CNE with *LMO3*.

A

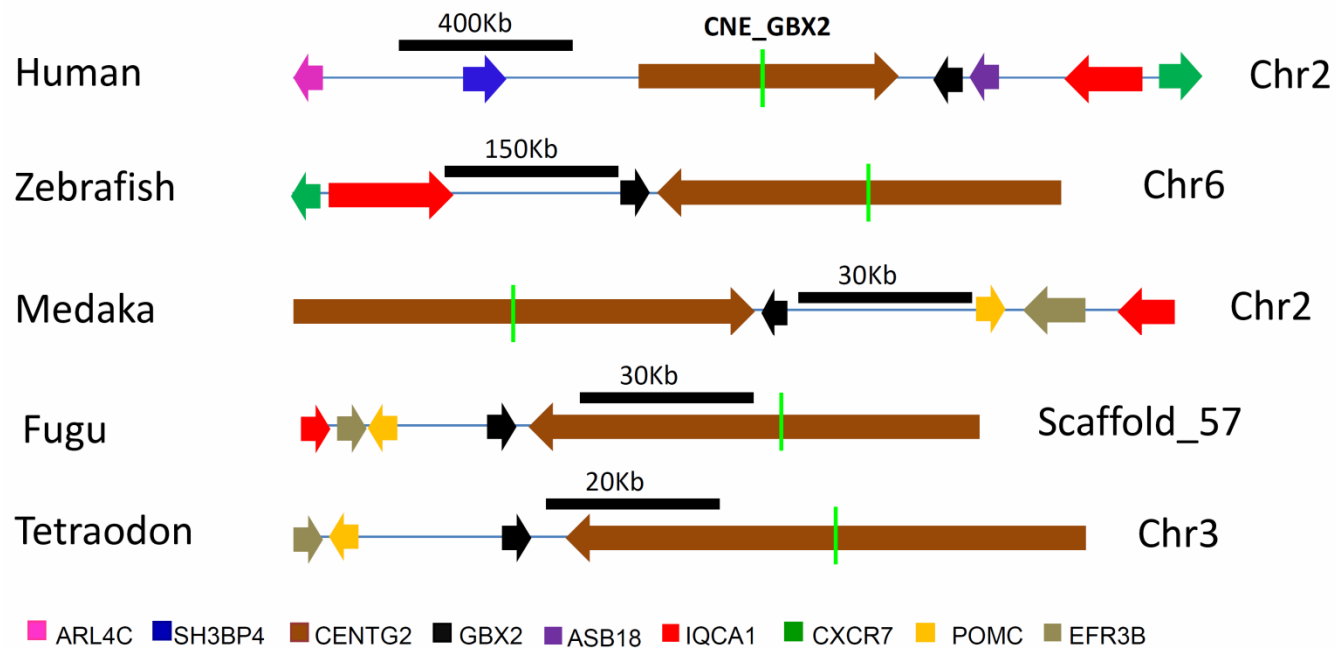

B

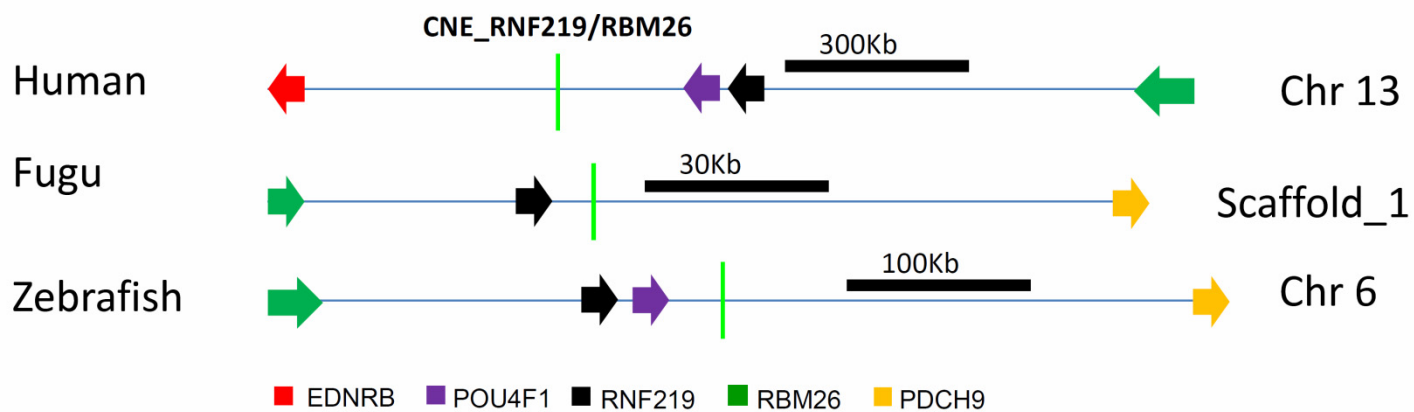

**Figure 50 . Predicting the target genes of human enhancers by analyzing their genic environment within and across vertebrate genomes (hs921/hs915).**

**(A)** CNE-enhancer within intron of human *CENTG2* gene is associated with neighboring *GBX2*. **(B)** A human CNE-enhancer positioned in the intergenic space between human *EDNRB* and *POU4F1* is associated with *RNF219* and *RBM26* according to the endogenous expression pattern analysis of genes and CNE-induced reporter gene expression.

A

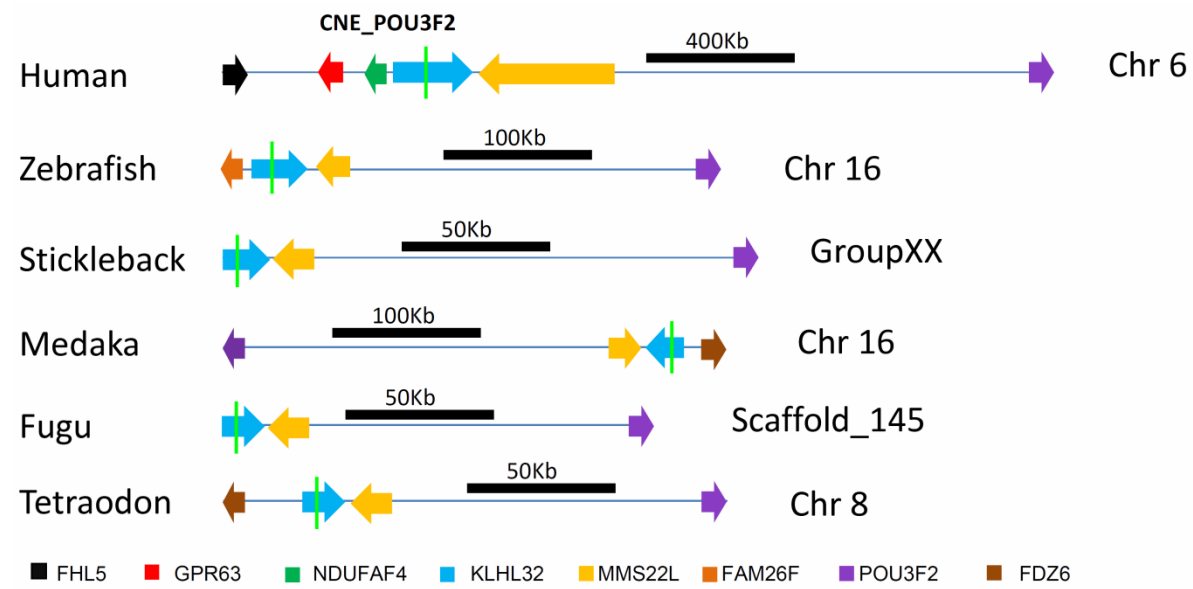

B

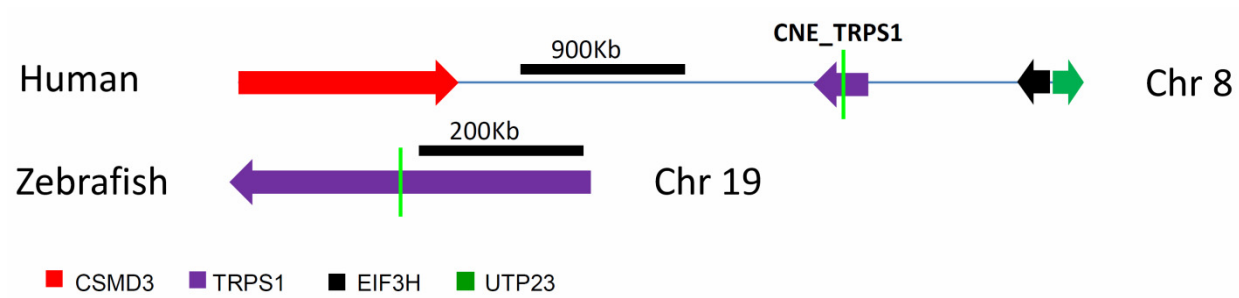

**Figure 51 . Analyzing the genic environment of human CNE-enhancers in teleost fish orthologous loci and expression pattern of reporter gene helps in identifying their target genes (hs676/hs919).**

(A) The physical location of human CNE-enhancer within the intronic region of *KIAA1900* (*KLHL32*) is conserved in its orthologous intervals in fish lineages, along with other bystander genes. However the endogenous expression pattern of *KIAA1900* and *MMS22L* matches with that of reporter gene expression, clearly inferring the association of enhancer with *KIAA1900* and *MMS22L*. (B) Analyzing the expression pattern and conservation in fish lineage shows that an intragenic CNE-enhancer is regulating the expression of *TRPS1* gene.

A

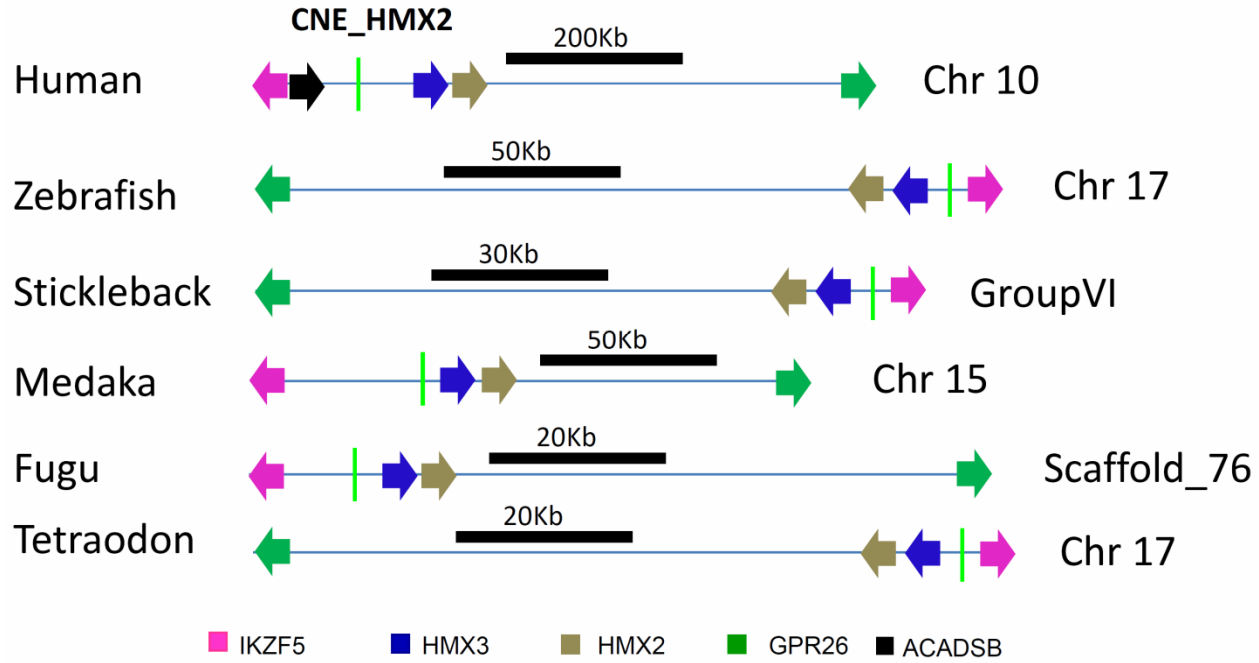

B

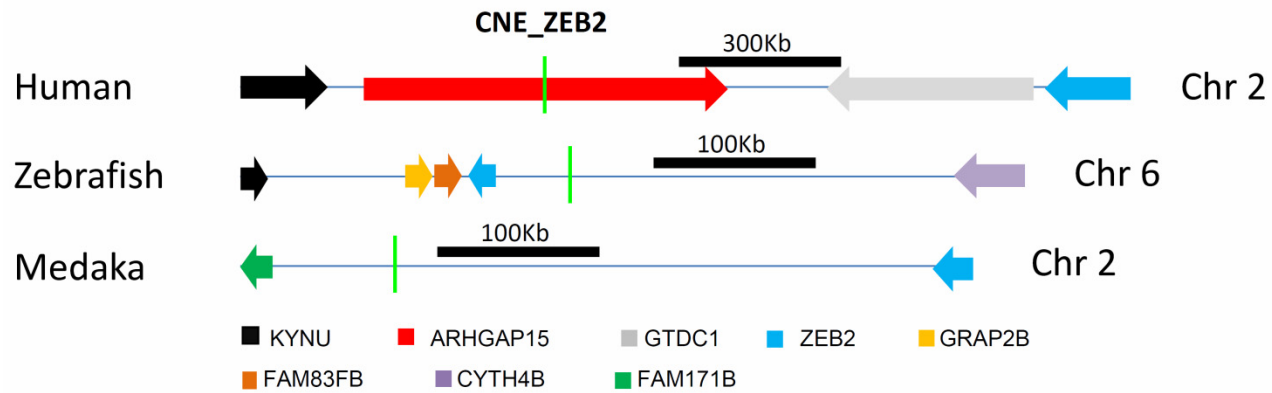

**Figure 52. Comparative analysis helps in assigning the CNE-enhancer to its target genes (hs329/hs675).**

(A) A human CNE-enhancer positioned in the intergenic space between human *ACADSB* and *HMX3* is associated with *HMX2* according to the endogenous expression pattern analysis of genes and CNE-induced reporter gene expression. (B) CNE-enhancer within an intron of human *ARHGAP15* gene is associated with neighboring *ZEB2* gene. Syntenic and expression pattern analysis supports this association.



A

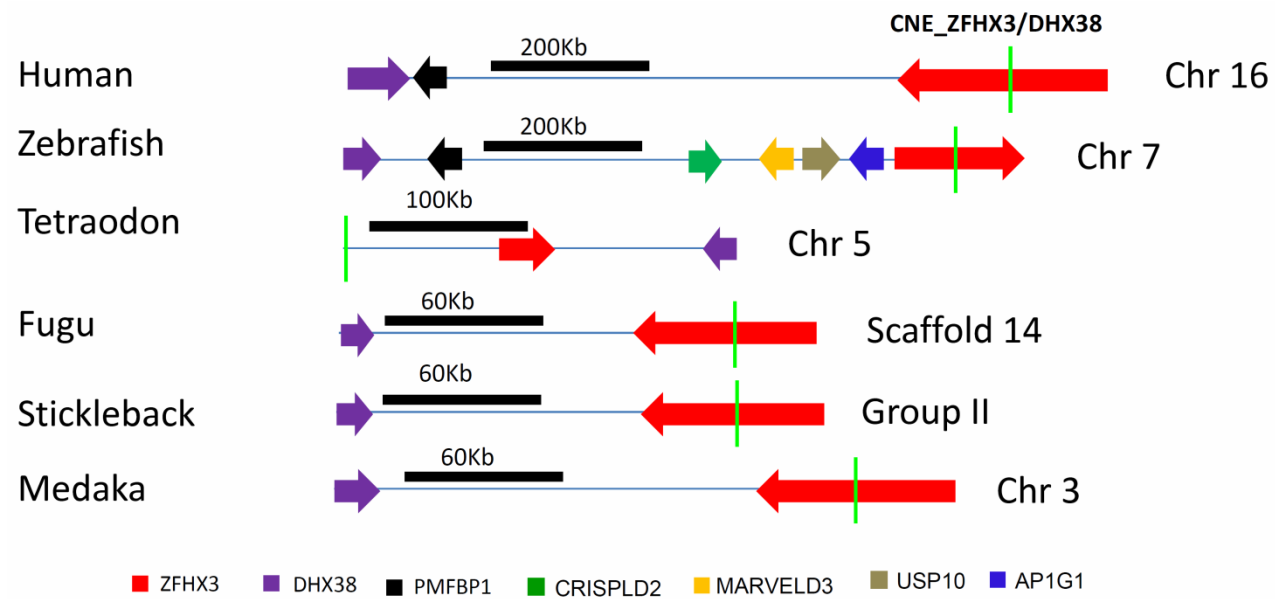

B

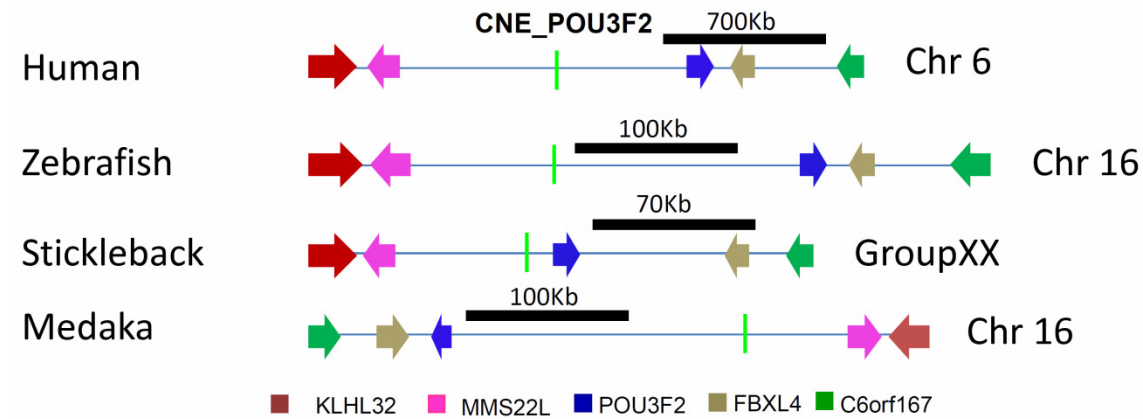

**Figure 53 . Target gene identification of human CNE-enhancers through orthology mapping (hs16/ hs282).**

(A) Conserved localization of CNE within the intronic region of *ZFHX3*, across the vertebrate lineage (except Tetraodon) associates this CNE-enhancer with its host gene. Analysis of expression pattern of genes and CNE-induced reporter gene expression along with syntenic analysis also associates this CNE with *DHX38* gene. (B) A human CNE, present within the Intergenic region between *MMS22L* and *POU3F2* genes, is associated with *POU3F2* genes. Expression pattern of *MMS22L* is not matched with CNE-induced reporter gene expression.

A

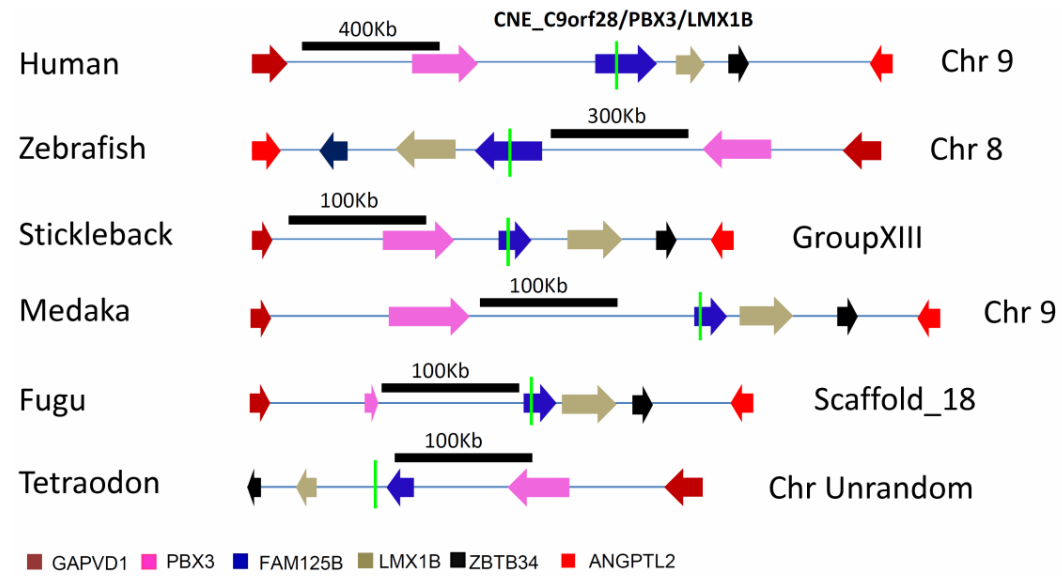

B

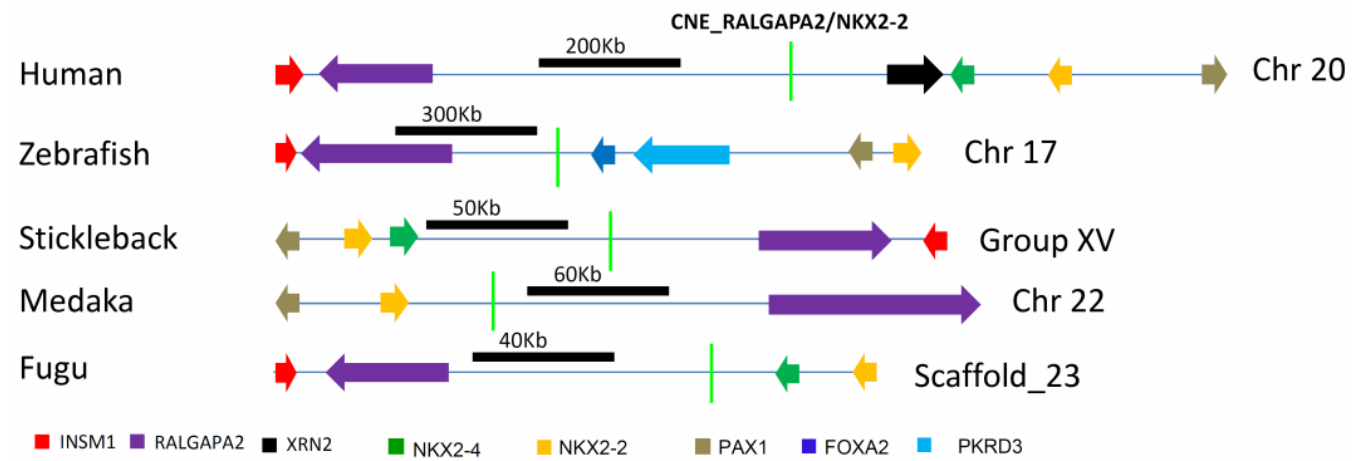

**Figure 54 . Analysis of genic environment of human CNE-enhancers in teleost fish orthologous genomic intervals helps in identifying their target genes (hs186/ hs914).**

**(A)** An intragenic CNE is associated with its harboring gene *C9orf28* (*FAM125B*). Synteny and expression pattern analysis also associate this CNE with *PBX3* and *LMX1B* genes. **(B)** A human CNE is present between *RALGAPA2* and *XRN2*. Comparative syntenic analysis reveals that *XRN2* is lost in fish lineage. Expression pattern analysis and interspecies conservation supports the association of this CNE-enhancer with *RALGAPA2* and *NKX2-2* genes.

A

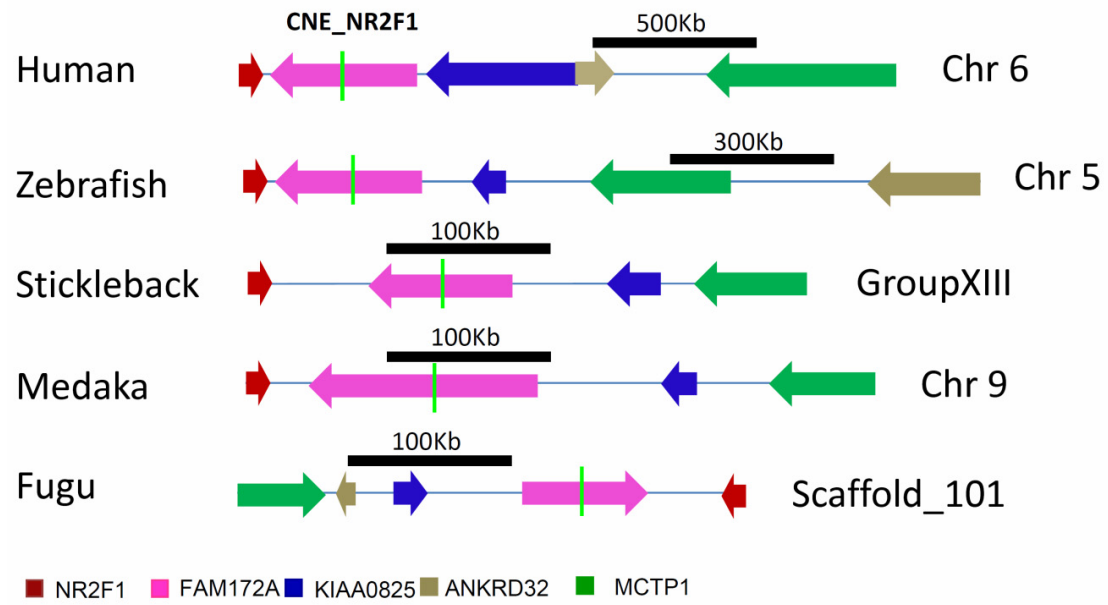

**Figure 55 . Assigning the target genes to CNE-enhancers through comparative genomic analysis (hs271).**

**(A)** CNE-enhancer within an intron of human *FAM172A* gene is associated with neighboring *NR2F1* gene according to the expression pattern analysis.

A

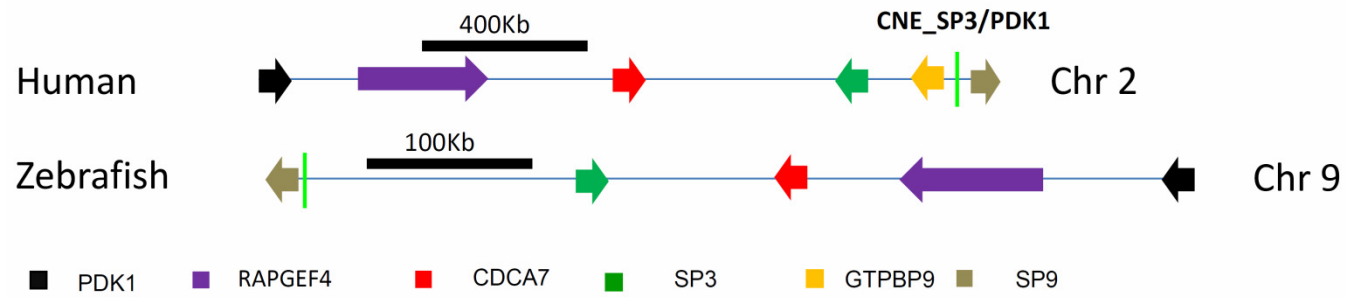

B

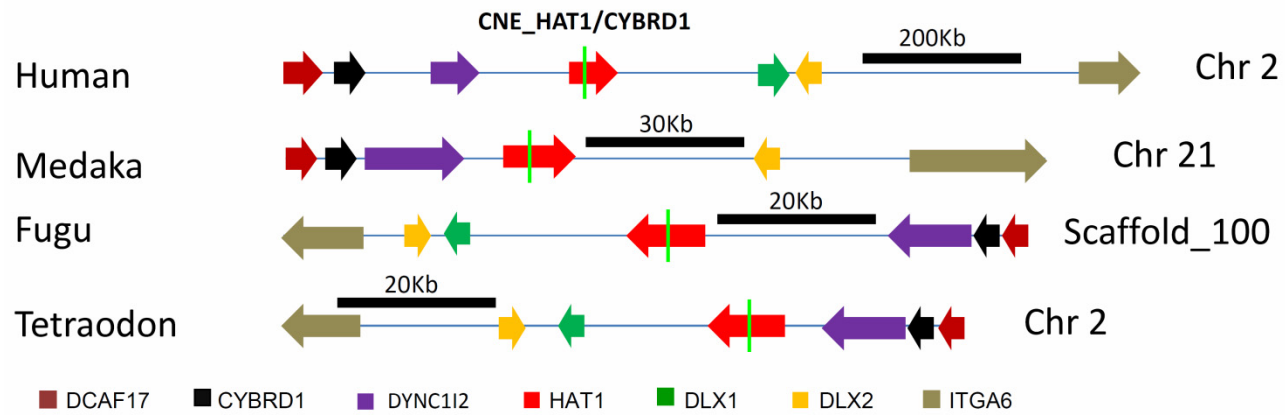

**Figure 56 . Assigning the target genes to CNE-enhancers through comparative genomic analysis (hs860/hs646 ).**

**(A)** A human CNE is present within intergenic region of *GTPBP9* and *SP9* genes. According to the expression pattern analysis and interspecies genic conservation, this CNE is associated with *SP3* and *PDK1* genes. **(B)** An intragenic CNE is associated with its harboring gene *HATI*. Syntenic and expression pattern analysis also associate this CNE with *CYBRDI* gene.



A

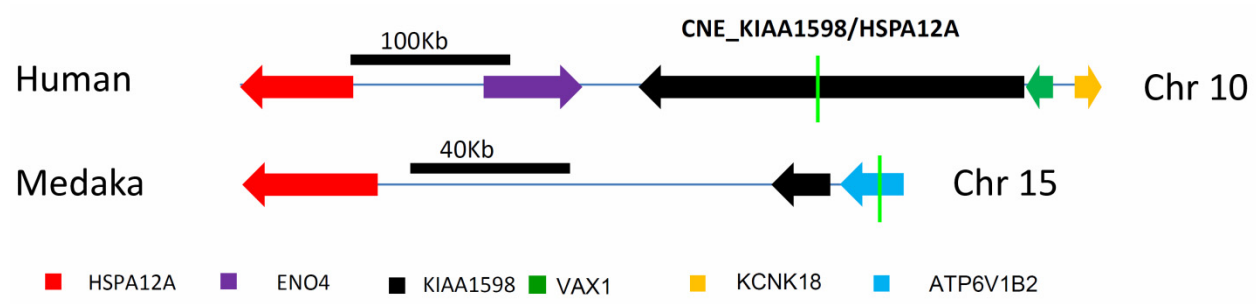

B

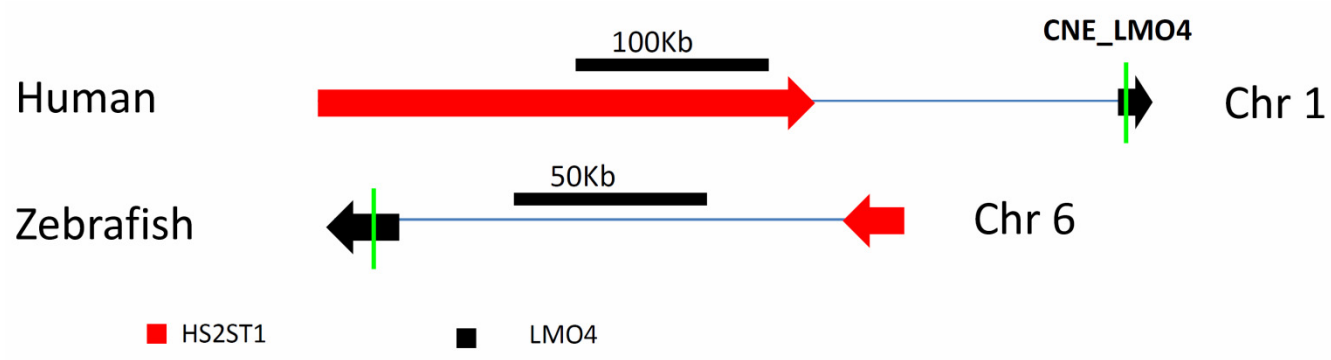

**Figure 57 . Analyzing the genic architecture of human (hs841/hs809).**

**(A)** A CNE is present within intron of *KIAA1598* gene. This CNE is associated with *KIAA1598* and *HSPA12A* genes. **(B)** Conserved intragenic position of CNE-enhancer and expression pattern analysis clearly associates this CNE with its harboring gene *LMO4*.

A

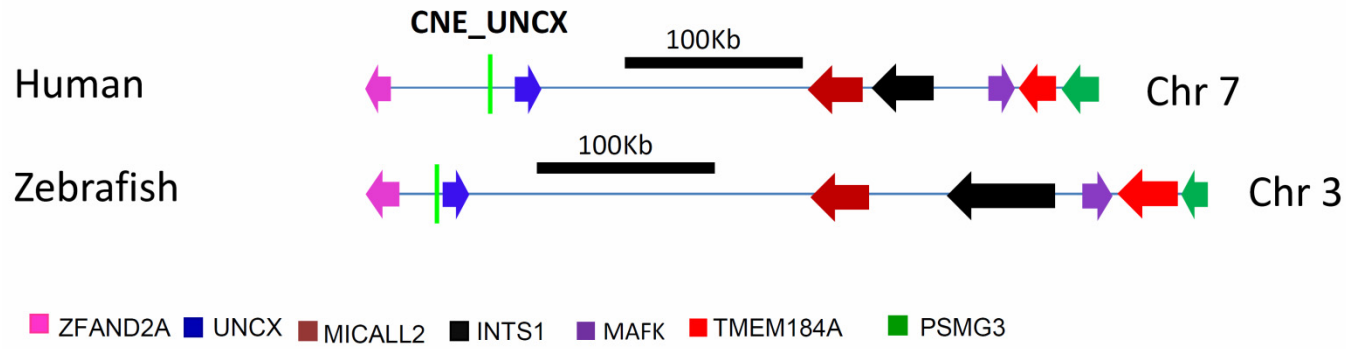

B

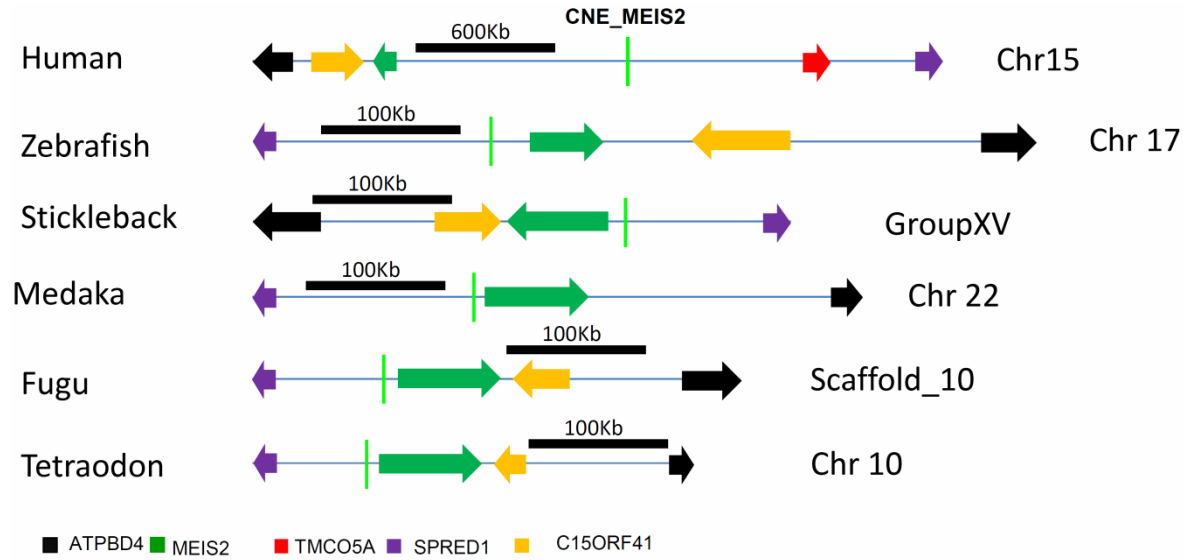

**Figure 58 . Analysis of human CNE-enhancers loci in teleost fish orthologous genomic intervals helps in identifying their target genes (hs293/hs572).**

**(A)** A human CNE-enhancer is located within the intergenic region between *ZFAND2A* and *UNCX* genes. Endogenous expression pattern and CNE-induced reporter gene expression suggest the association between this CNE and *UNCX*. Expression pattern of *ZFAND2A* is unrelated to CNE expression pattern. **(B)** A CNE is positioned between *MEIS2* and *TMCO5* at human chromosome. Careful syntenic analysis shows that *TMCO5* is lost in teleost fish lineage, leaving the *MEIS2* best candidate for CNE association. Moreover, analysis of endogenous gene expression of *MEIS2* and CNE-induced reporter gene activity pattern clearly associates this CNE with *MEIS2*.

A

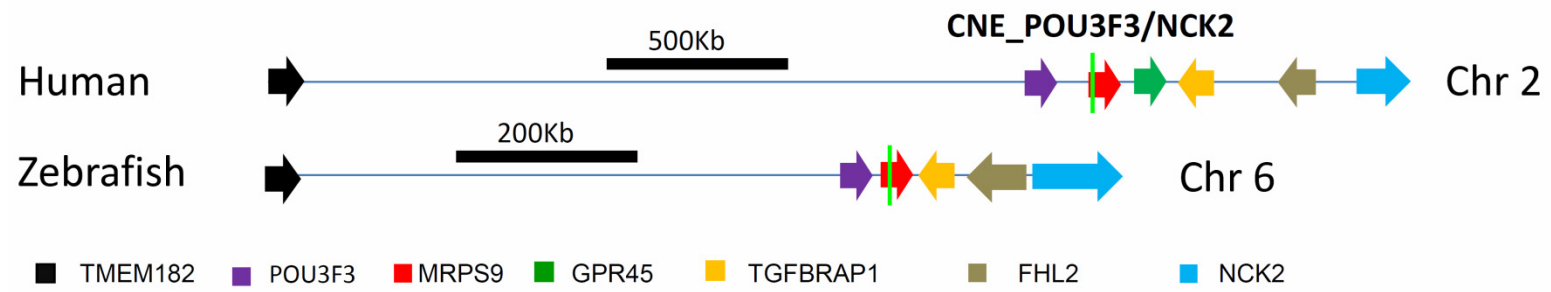

B

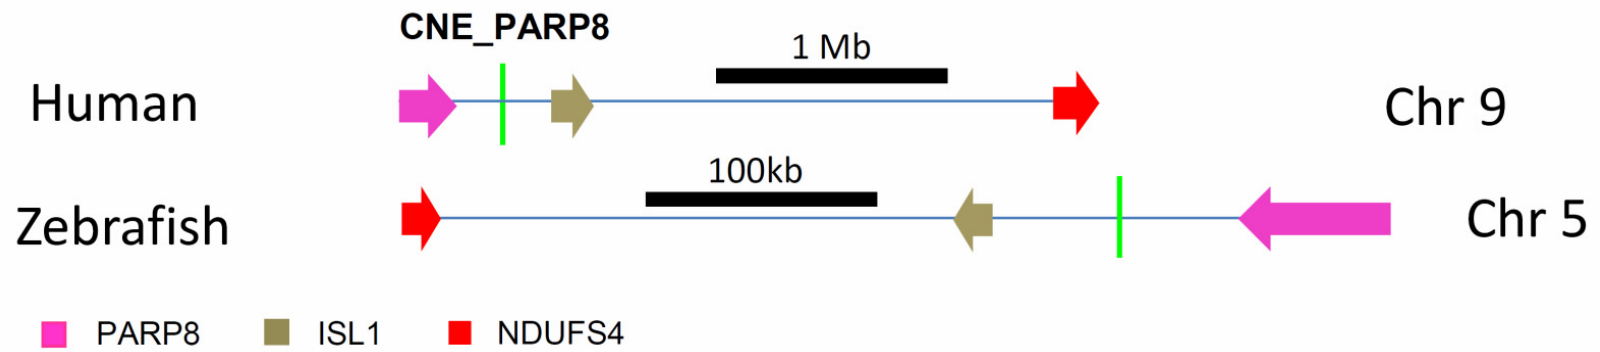

**Figure 59 . Human-fish comparative analysis of human CNEs (hs868/hs215).**

(A) Conserved localization of human CNE within the intron of *MRPS9* gene, in human and teleost fish lineages, proposes the association between CNE and its harboring gene. But careful expression pattern analysis of both, the genes and CNE-enhancer suggests that this CNE is regulating the *POU3F3* and *NCK2* genes. (B) A human CNE is located within the intergenic region between *PARP8* and *ISL1* genes. As, expression pattern of *ISL1* is not in accordance with CNE-enhancer, this CNE is associated with *PARP8* gene.

A

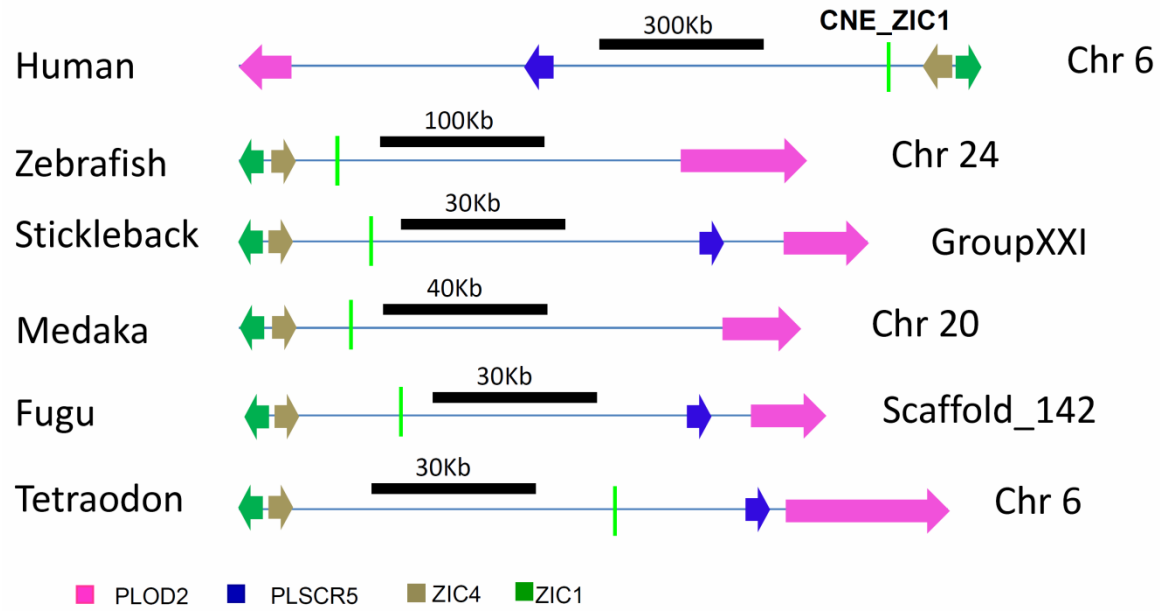

B

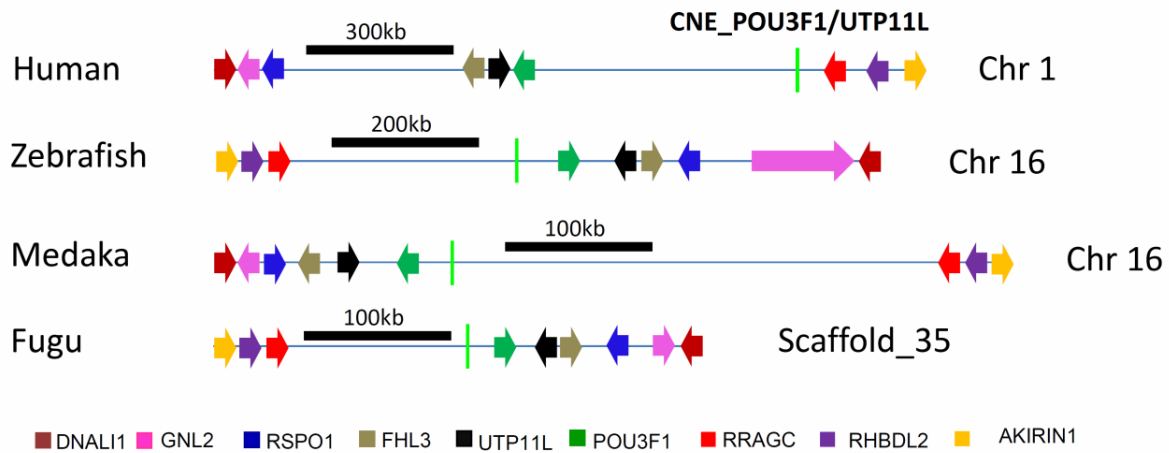

**Figure 60 . Comparing the human-fish genic content and their reporter gene expression lead to association of CNE enhancers to their respective genes (hs213/hs238).**

(A) Conserved positioning of human CNE between *PLSCR5* and *ZIC4* indicates that this CNE is associated with its flanking genes, but expression pattern supports *ZIC1* gene to be the target for this CNE. (B) A human CNE is associated with one of its flanking genes, *POU3F1*, and a neighboring gene *UTP11L*. The expression pattern of other flanking gene *RRAGC* is not in accordance with CNE-induced reporter gene expression.



A

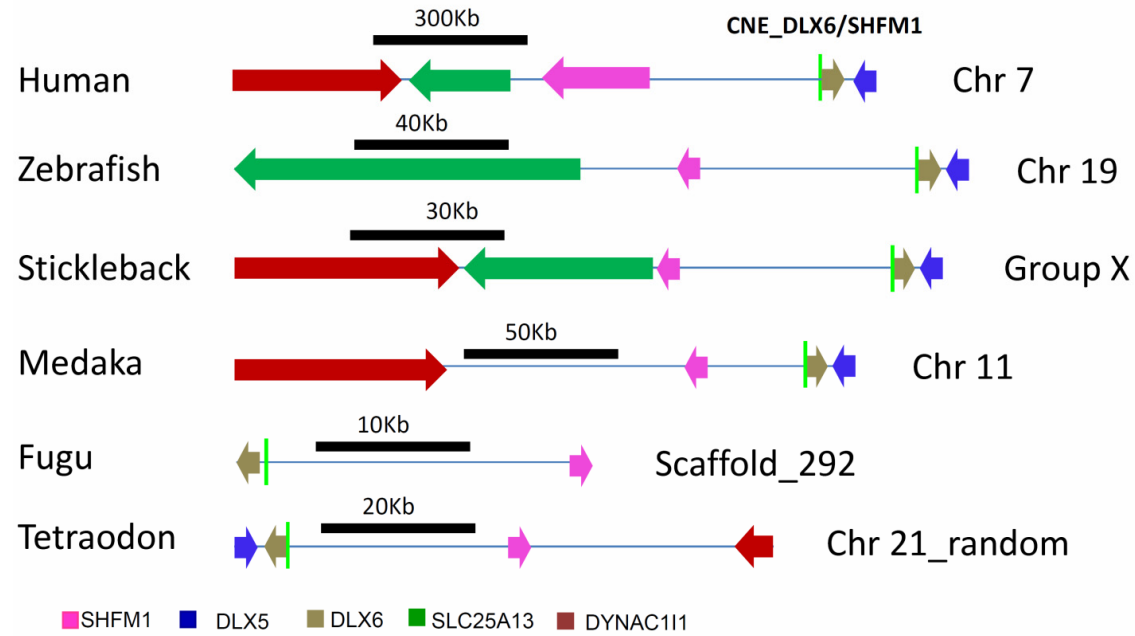

B

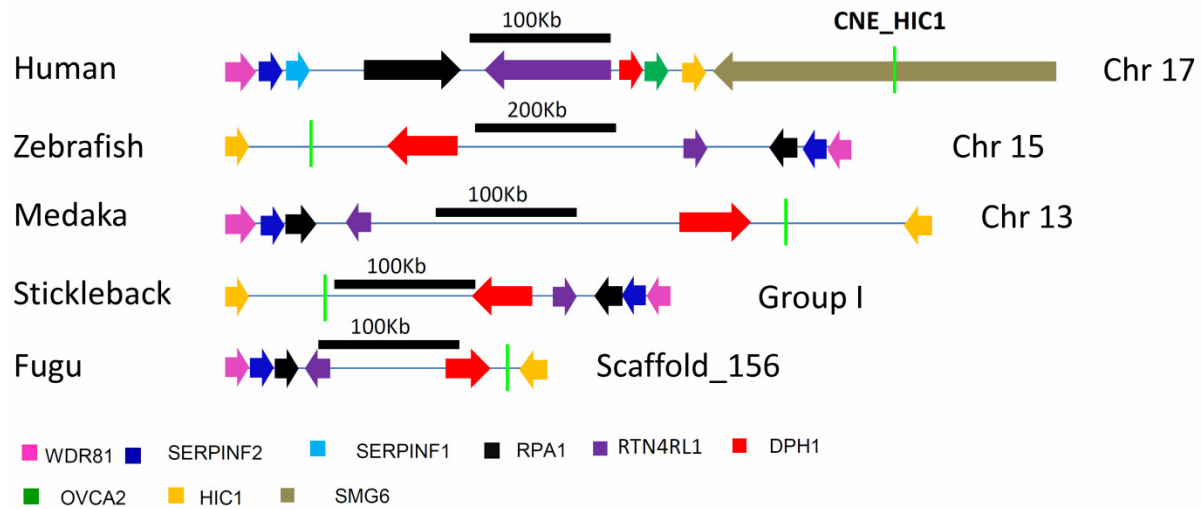

**Figure 61 . Analysis of genic environment of human CNE-enhancers in teleost fish orthologous genomic intervals and observing their expression patterns helps in identifying their target genes (hs298/ hs924).**

(A) Conserved allotment of a human CNE between its flanking genes, *SHFM1* and *DLX6*, across human and teleost fish lineages, and endogenous expression pattern analysis clearly associates this CNE with its flanking genes. (B) A human CNE present within the intron of *SMG6* gene is associated with a neighbor gene *HIC1*.

A

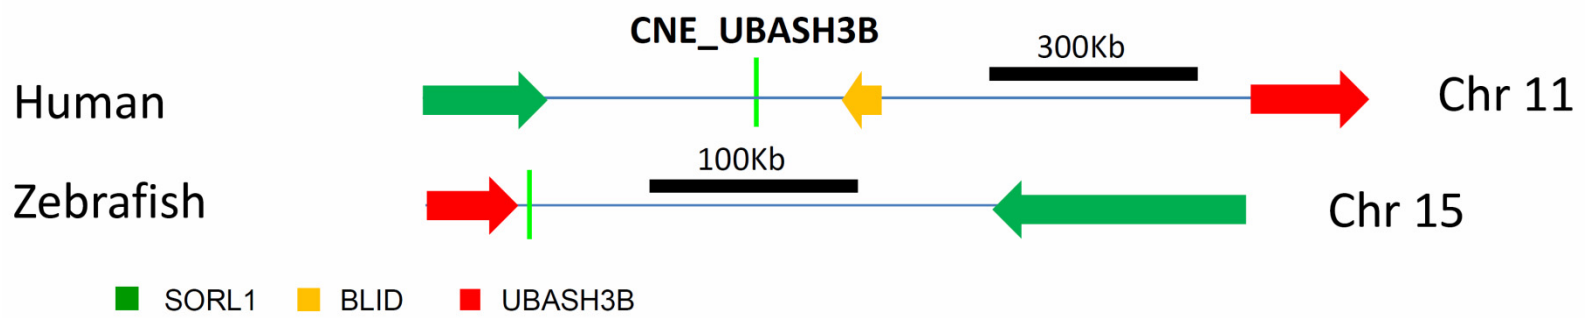

B

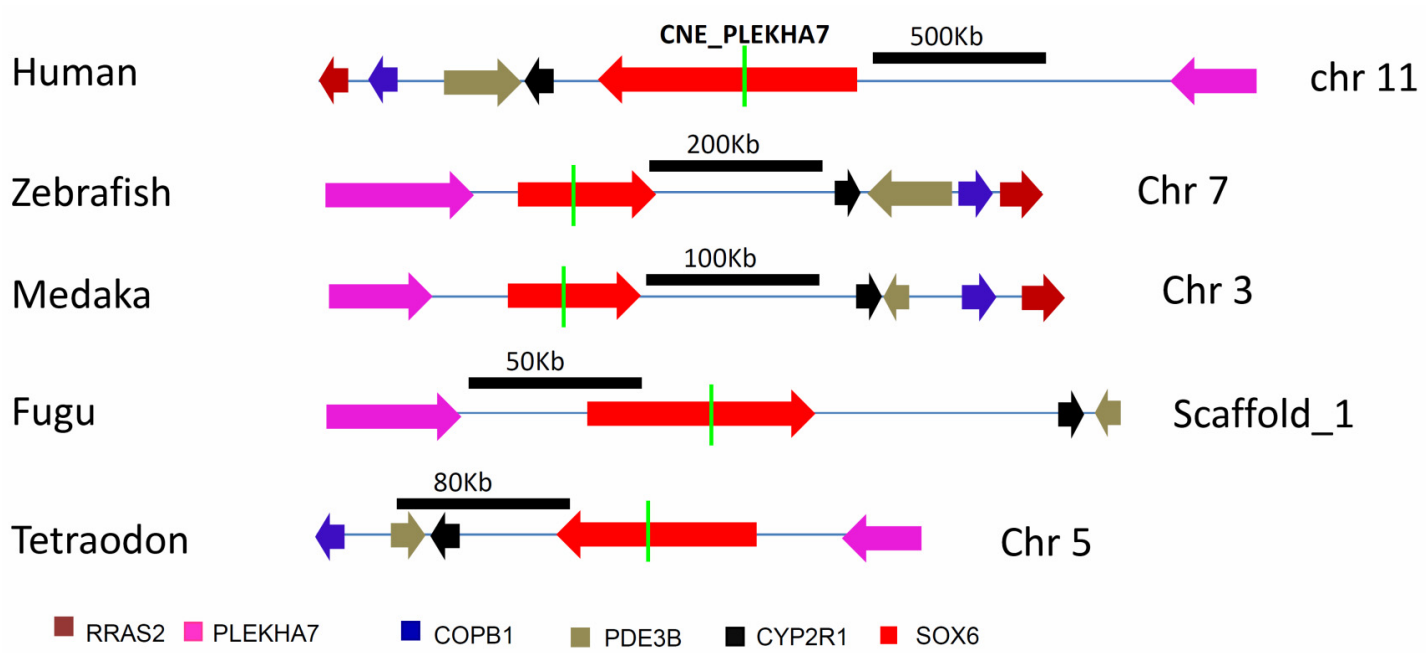

**Figure 62 . Comparative analysis and expression pattern studies help in associating the enhancer to its target gene (hs872/hs236).**

**(A)** A CNE-enhancer is located within the Intergenic region between *SORL1* and *BLID* genes in human genome. Careful syntenic analysis revealed that *BLID* is lost in fish genome. Analysis of expression pattern of genes and CNE-induced reporter gene activity associates this CNE with a neighboring gene, *UBASH3B*. **(B)** Although, a human CNE is having conserved localization within intron of *SOX6* gene, across human and teleost fish lineages, expression pattern analysis supports the association between this CNE and *PLEKHA7* gene.

A

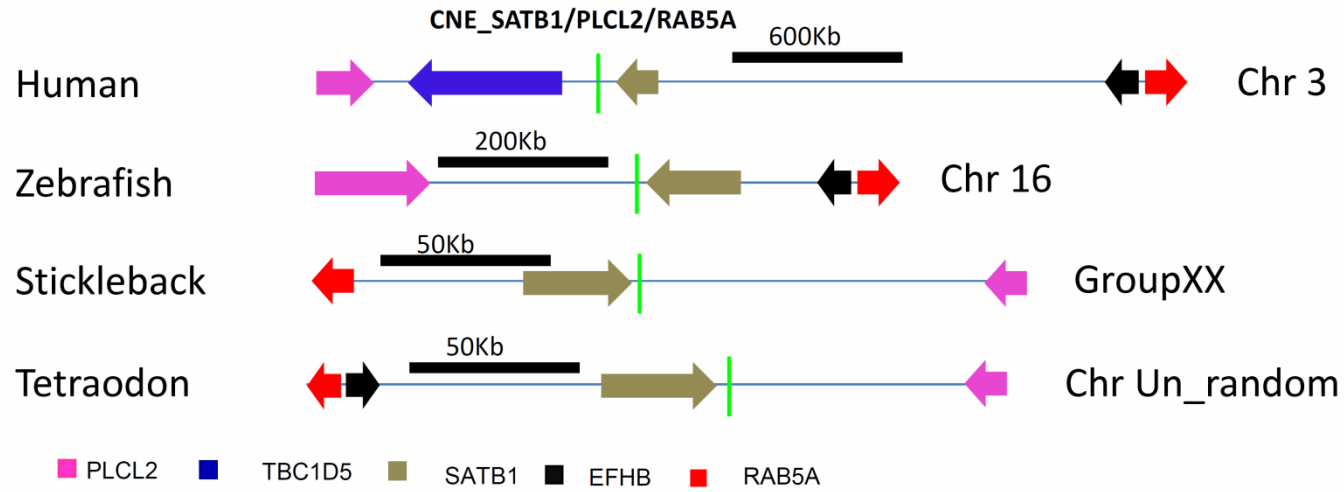

B

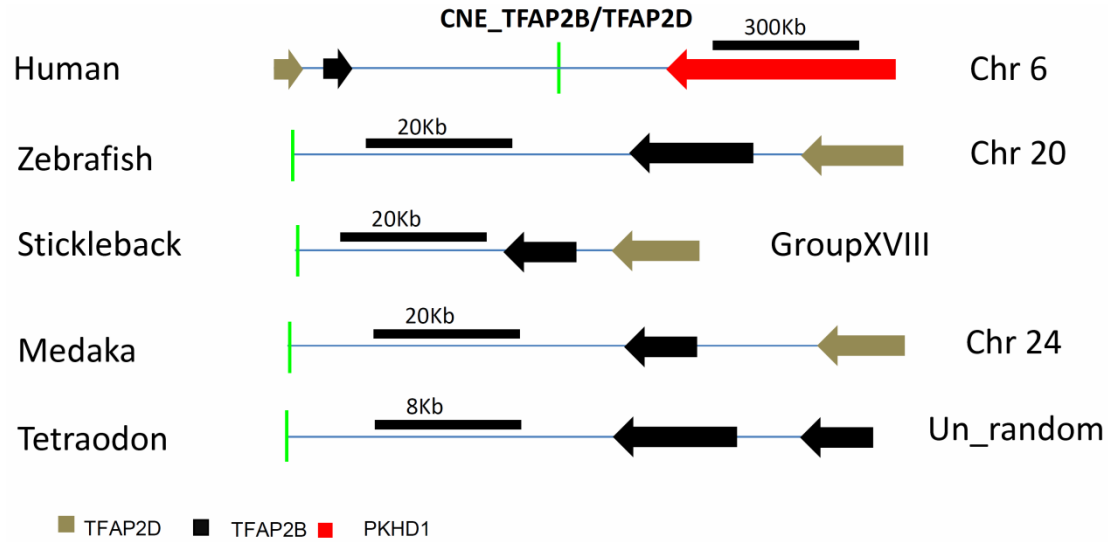

**Figure 63 . Comparative analysis and expression pattern studies help in finding the target gene for CNE-enhancer (hs250/hs217).**

**(A)** Expression pattern analysis of conserved genes with CNE-induced reporter gene expression associates this CNE with *SATB1*, *PLCL2* and *RAB5A* genes. This association is also supported by conserved synteny across human and teleost fish genomes. **(B)** One of the flanking genes of a human CNE, *PKHDI*, is lost in fish genomes. There are two conserved genes near the CNE, *TFAP2B* and *TFAP2D*, which are suggested target genes of this CNE-enhancer.

A

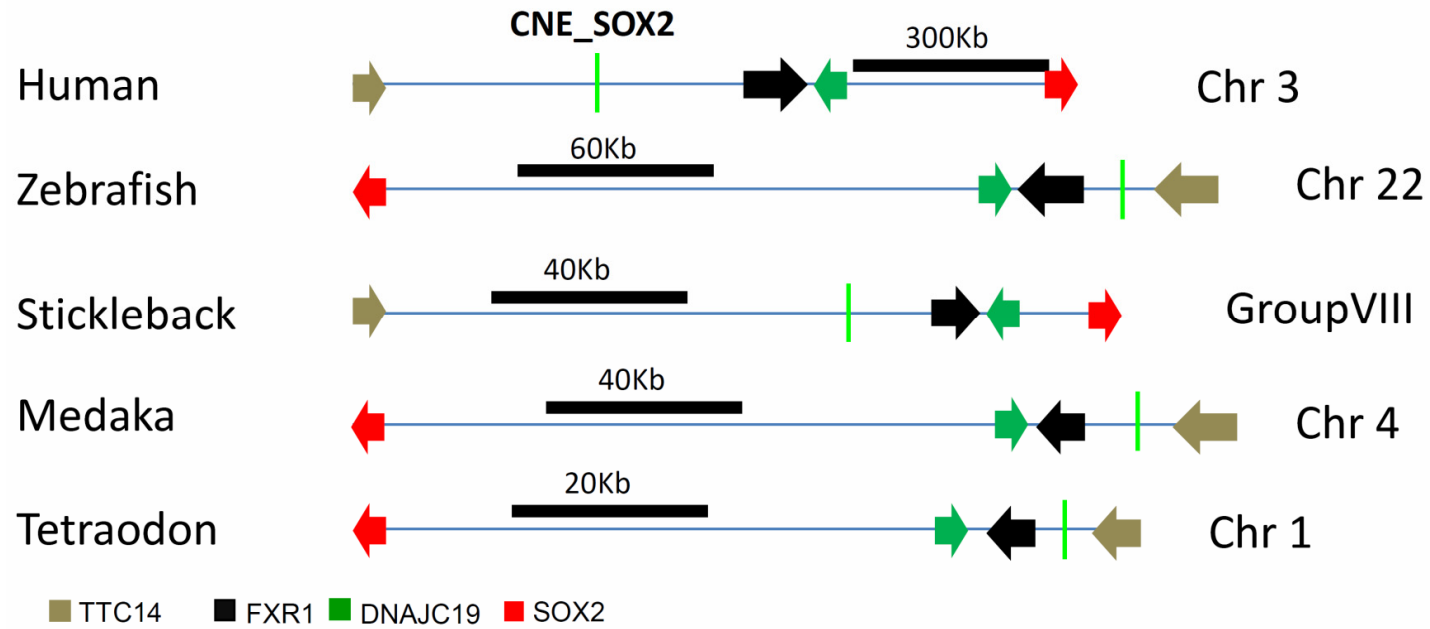

B

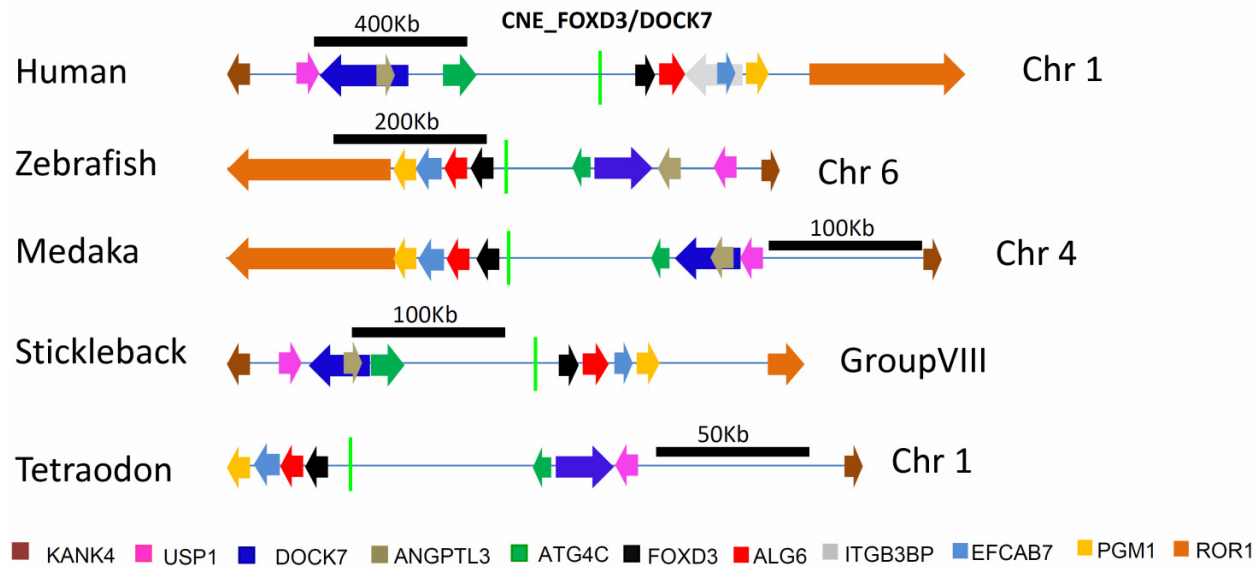

**Figure 64 . Human CNE-enhancers by tracing the genic context of their orthologous copies in teleost fish lineage (hs258/hs764).**

(A) Although, positioning of a human intragenic CNE is conserved across human and teleost fish lineages, expression pattern analysis indicates the *SOX2* as the target gene for this CNE. (B) A human CNE is located within the Intergenic region between *ATG4C* and *FOXD3* and this localization is conserved across human and teleost fish lineages. Expression pattern of *ATG4C* is different from that of CNE-induced reporter gene. Careful syntenic and expression pattern analysis reveals that this CNE is associated with *FOXD3* and *DOCK7* genes.



A

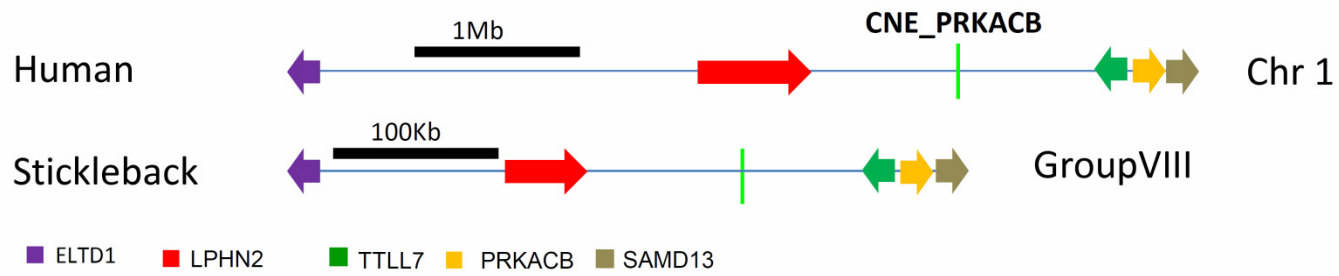

B

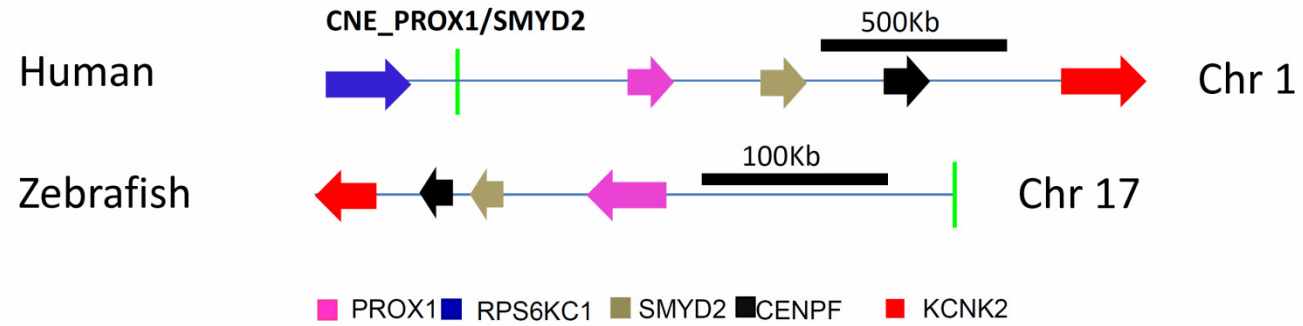

**Figure 65 . Analysis of CNE-enhancers in humans and its orthologous genomic intervals teleost fish lineage helps in associating CNE to their target genes (hs442/hs204).**

(A) Intergenomic conserved synteny and expression pattern profile associates this human CNE with *PRKACB* gene. (B) A human CNE is associated with *PROX1* and *SMYD2* gene. One of the flanking genes, *RPS6KCI*, is lost in fish lineage.

**A**

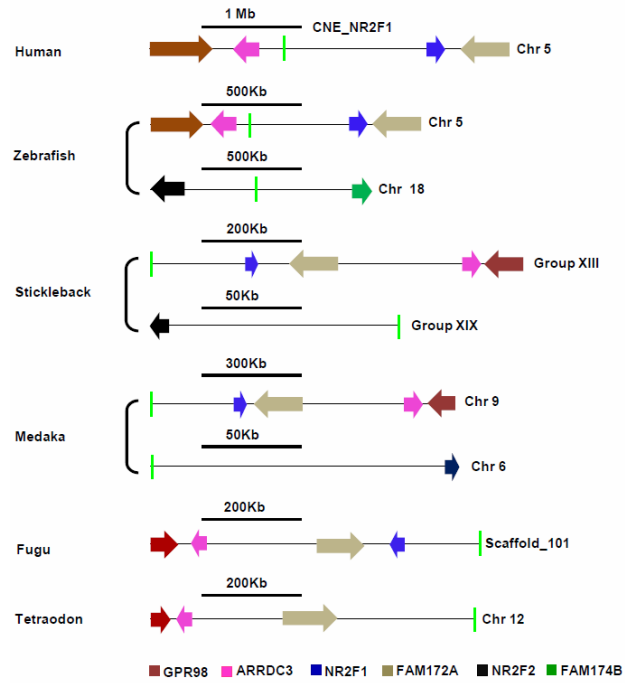

**B**

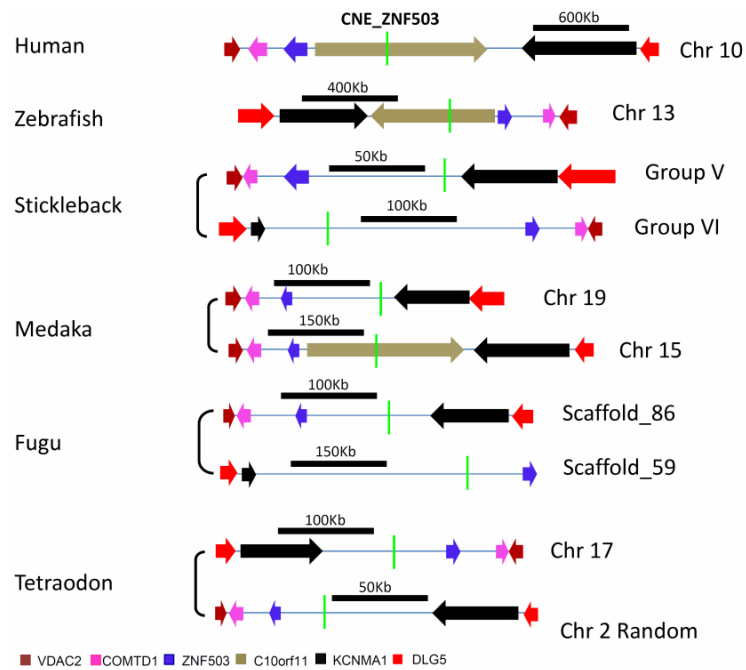

**Figure 66 . Predicting the target genes of human enhancers by analyzing their genic environment within and across vertebrate genomes (hs271/hs320).**

**(A)** Careful syntenic analysis of CNE in human and fish lineage reveals that CNE is duplicated only in fish genomes. Conserved localization pattern of duplicated CNEs and their corresponding paralogous gene, and expression pattern analysis clearly refers *NR2F1* as the target gene for this CNE. **(B)** A CNE is duplicated only in fish lineage (Except Zebrafish). Conserved localization pattern of duplicated CNEs and their corresponding paralogous gene, and expression pattern analysis clearly refers *ZNF503* as the target gene for this CNE.

A

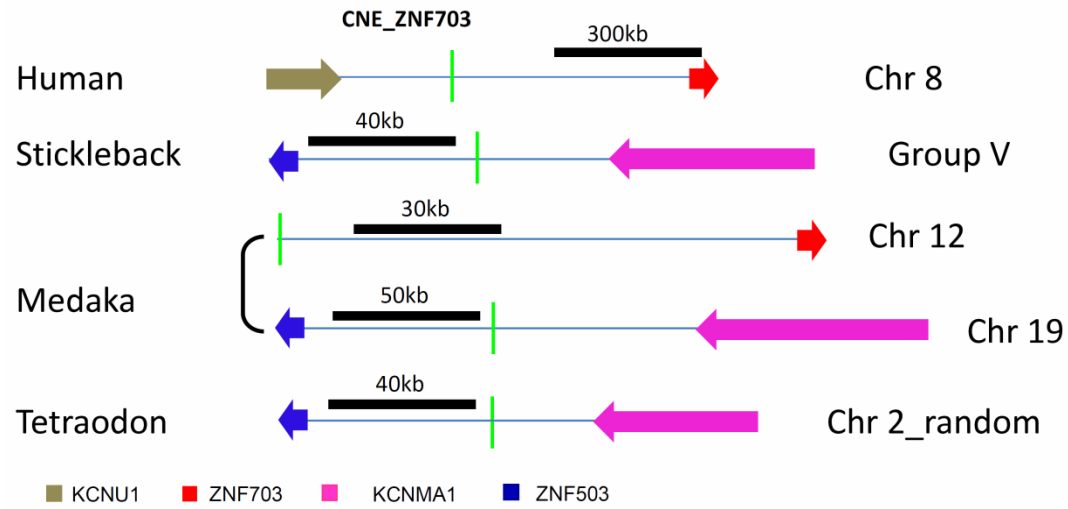

B

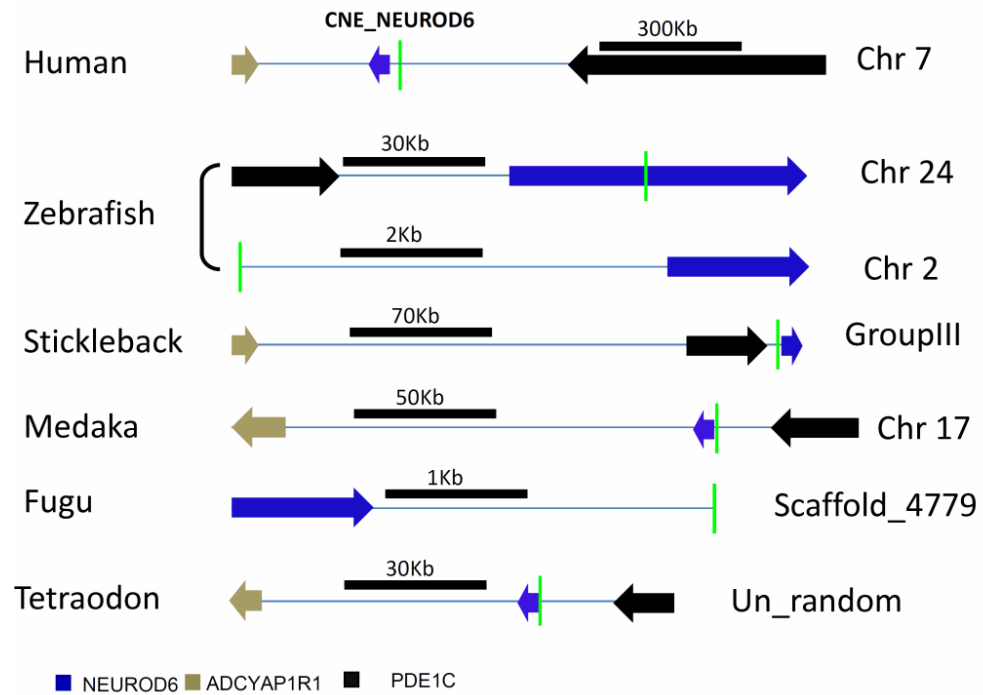

**Figure 67 . Analyzing the genic environment of human CNE-enhancers in teleost fish orthologous loci and expression pattern of reporter gene helps in identifying their target genes (hs631/hs297).**

**(A)** Syntenic analysis of a human CNE in teleost fish lineage reveals that this CNE is duplicated only in Medaka. CNE duplication pattern and endogenous expression profile suggests that this CNE is associated with *ZNF703* and dCNE is associated with paralog *ZNF503*. **(B)** A CNE is duplicated only in Zebrafish. Intergenomic conserved synteny, duplication pattern and expression profile refers *NEUROD6* as the target gene for this CNE.

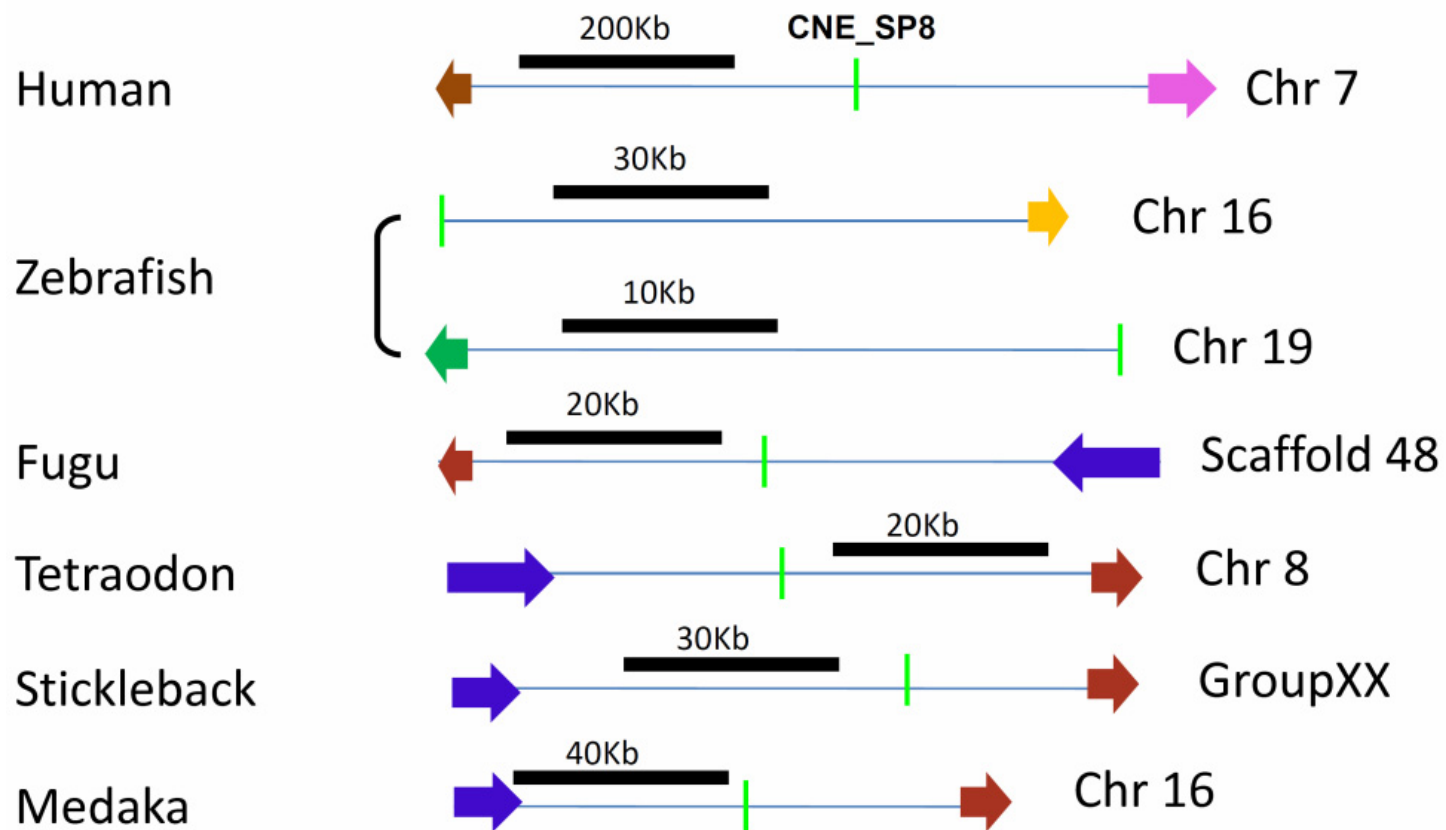

■ SP8   
 ■ SP4   
 ■ RAPGEF   
 ■ SP8a   
 ■ SP8b

**Figure68 . Comparative analysis helps in assigning the CNE-enhancer to its target genes (hs110).**

A CNE is duplicated only in Zebrafish. Intergenomic conserved synteny, duplication pattern and expression profile refers *SP8* as the target gene for this CNE.



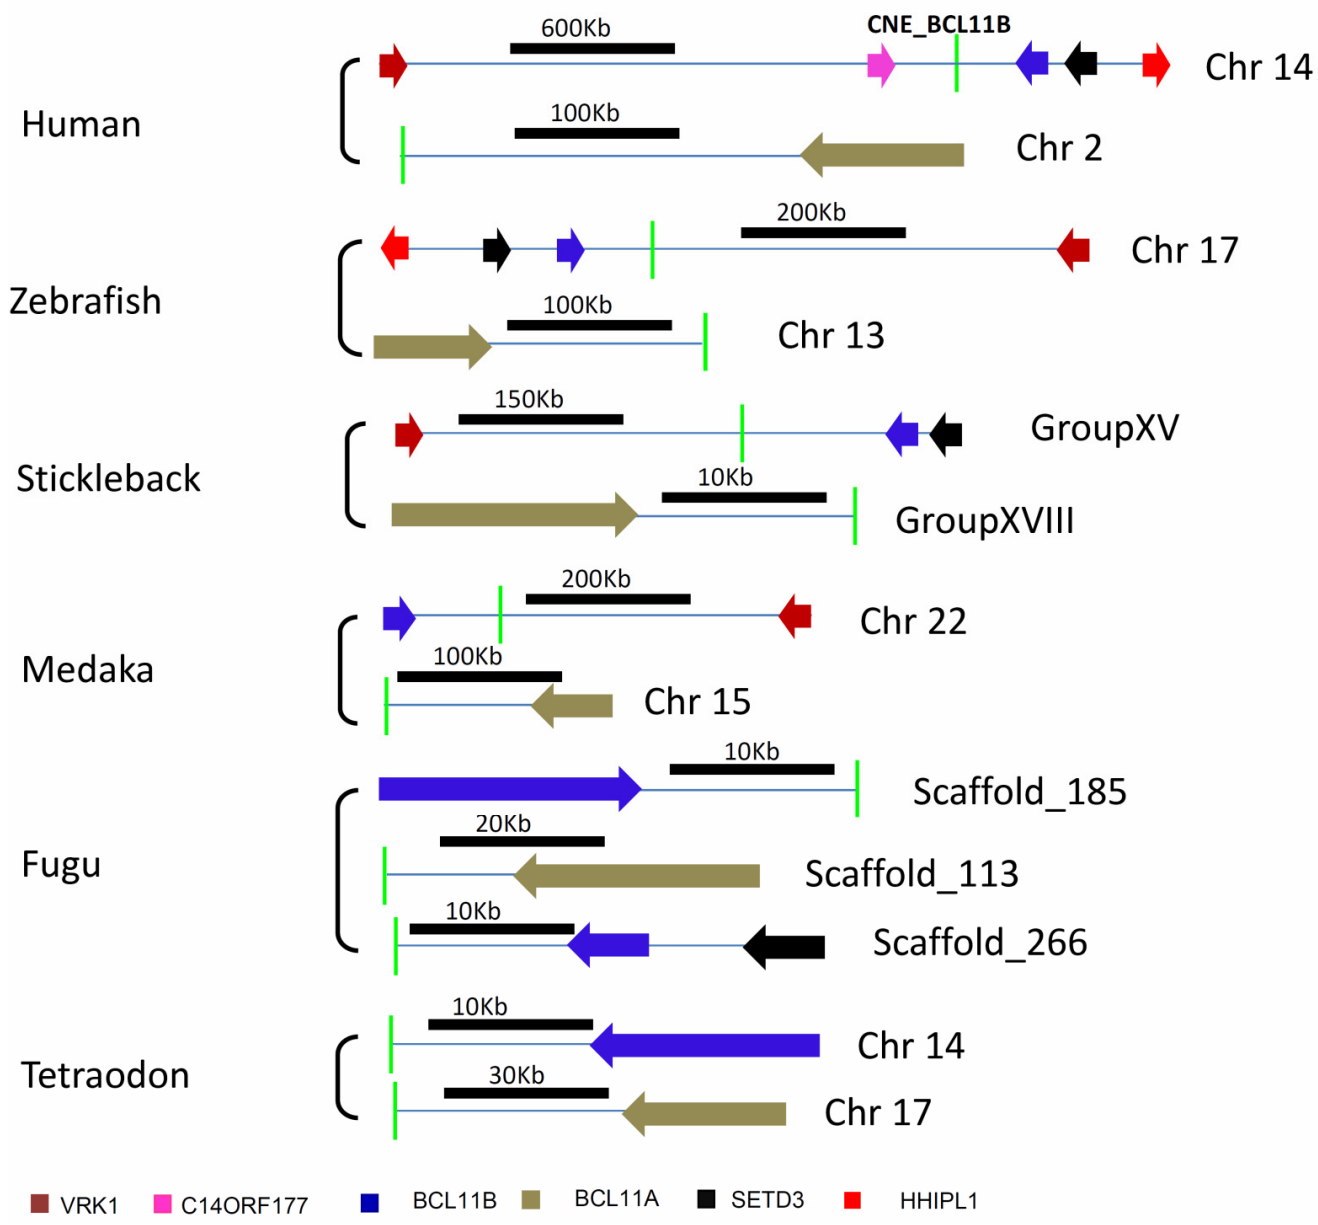

**Figure 69 . Target gene identification of human CNE-enhancers through orthology mapping (hs622).**

Duplication of human enhancer at the root of vertebrate lineage and preservation of linkage of duplicated enhancers with *BCL11* family members both within and across genomes, unmistakably suggest the specificity of these duplicated cis-regulatory regions towards *BCL11B* and *BCL11A* promoters.

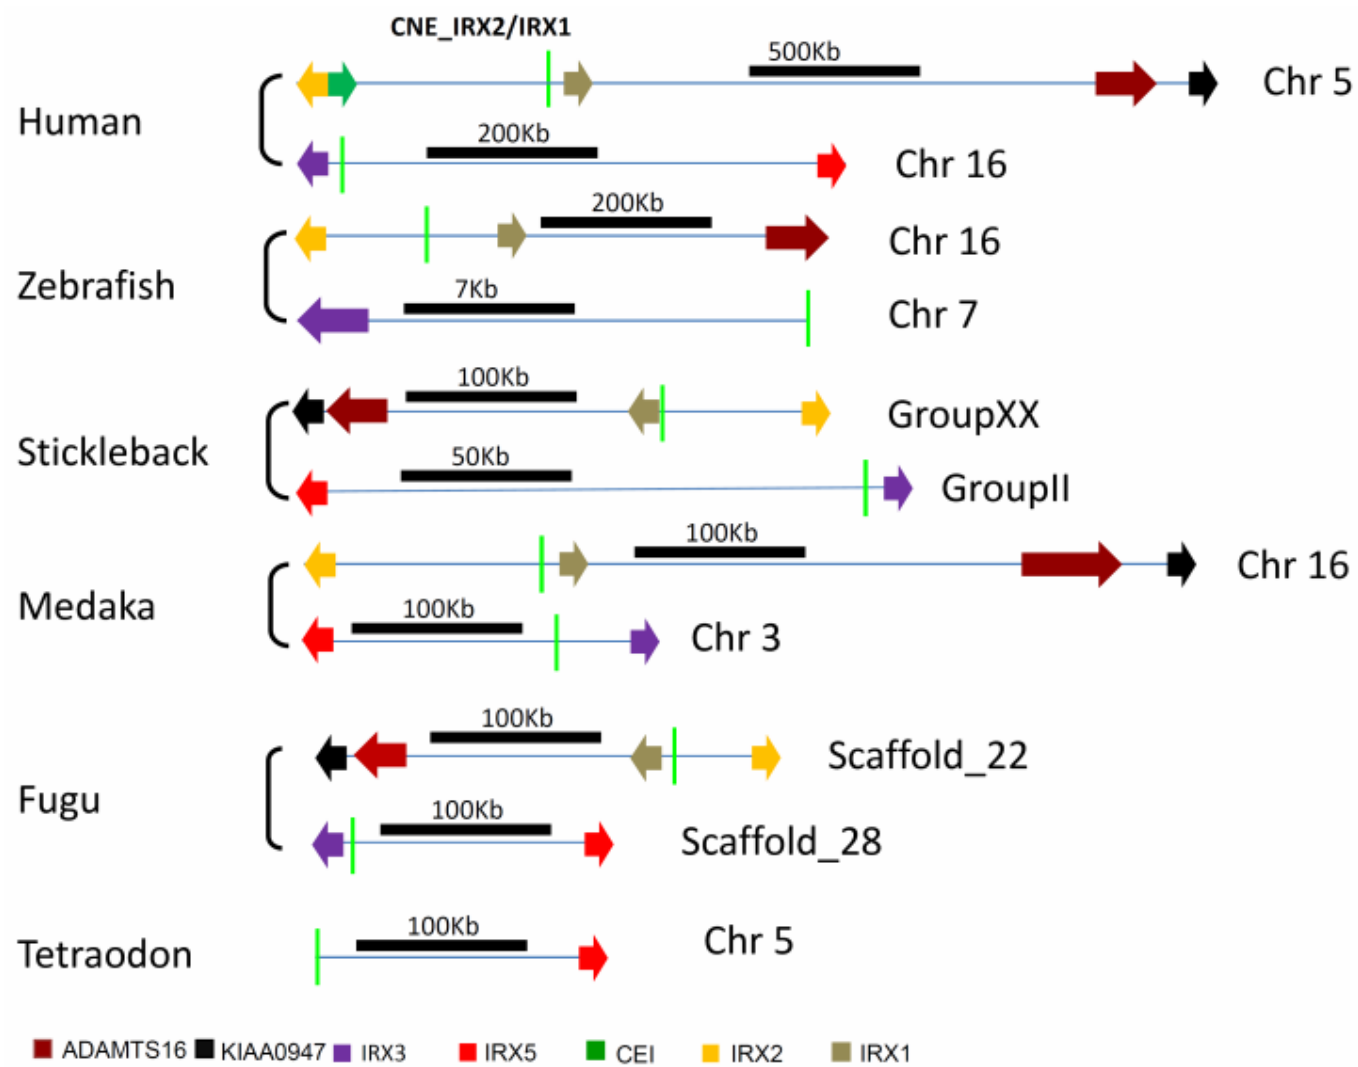

**Figure 70 . Analysis of genic environment of human CNE-enhancers in teleost fish orthologous genomic intervals helps in identifying their target genes (hs261).**

Human enhancer-target gene duplicated early in vertebrate history, before tetrapod-teleost split. Conserved association between duplicated enhancers and *IRX* paralogs indicate that these duplicated human enhancers (*CNE-IRX2*, *CNE-IRX1* and *CNE-IRX5*, *CNE-IRX3*) are specific to *IRX2*, *IRX1*, *IRX5* and *IRX3* respectively.

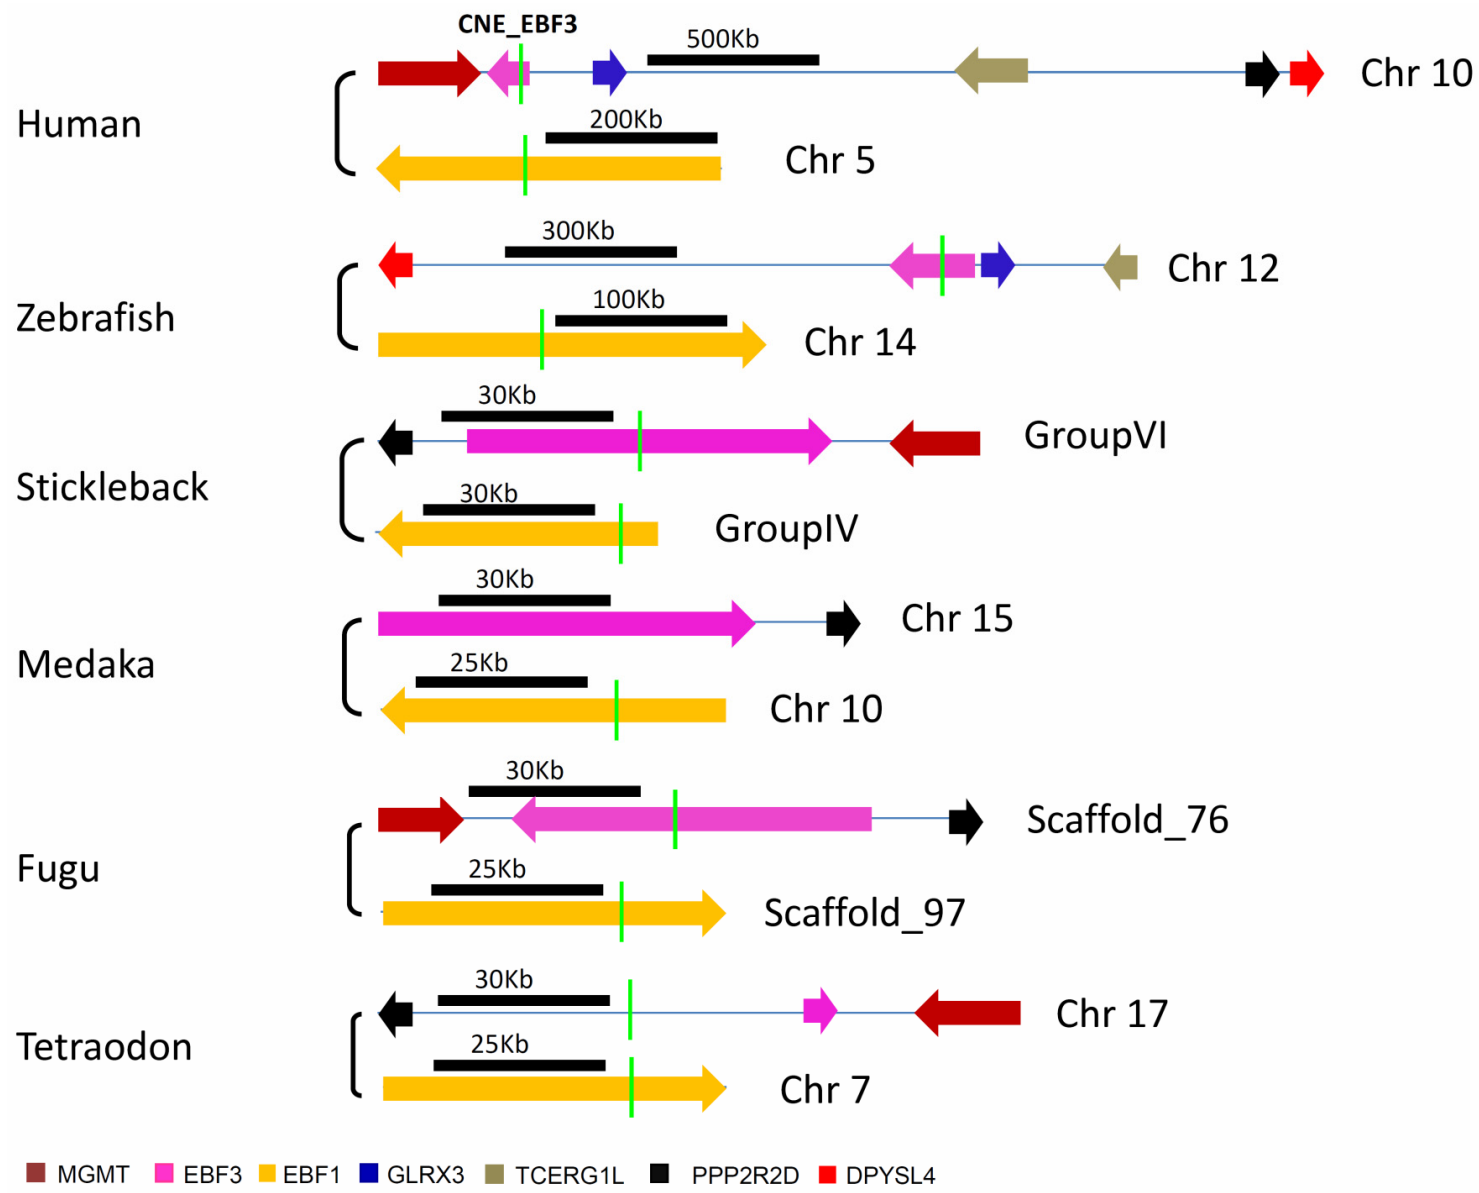

**Figure 71 . Assigning the target genes to CNE-enhancers through comparative genomic analysis (hs232).**

Human enhancer-target gene duplicated early in vertebrate history, before tetrapod-teleost split. Conserved association between duplicated enhancers and *EBF* paralogs indicate that these duplicated human enhancers (*CNE-EBF3* and *CNE-EBF1*) are specific to *EBF3* and *EBF1*, respectively.

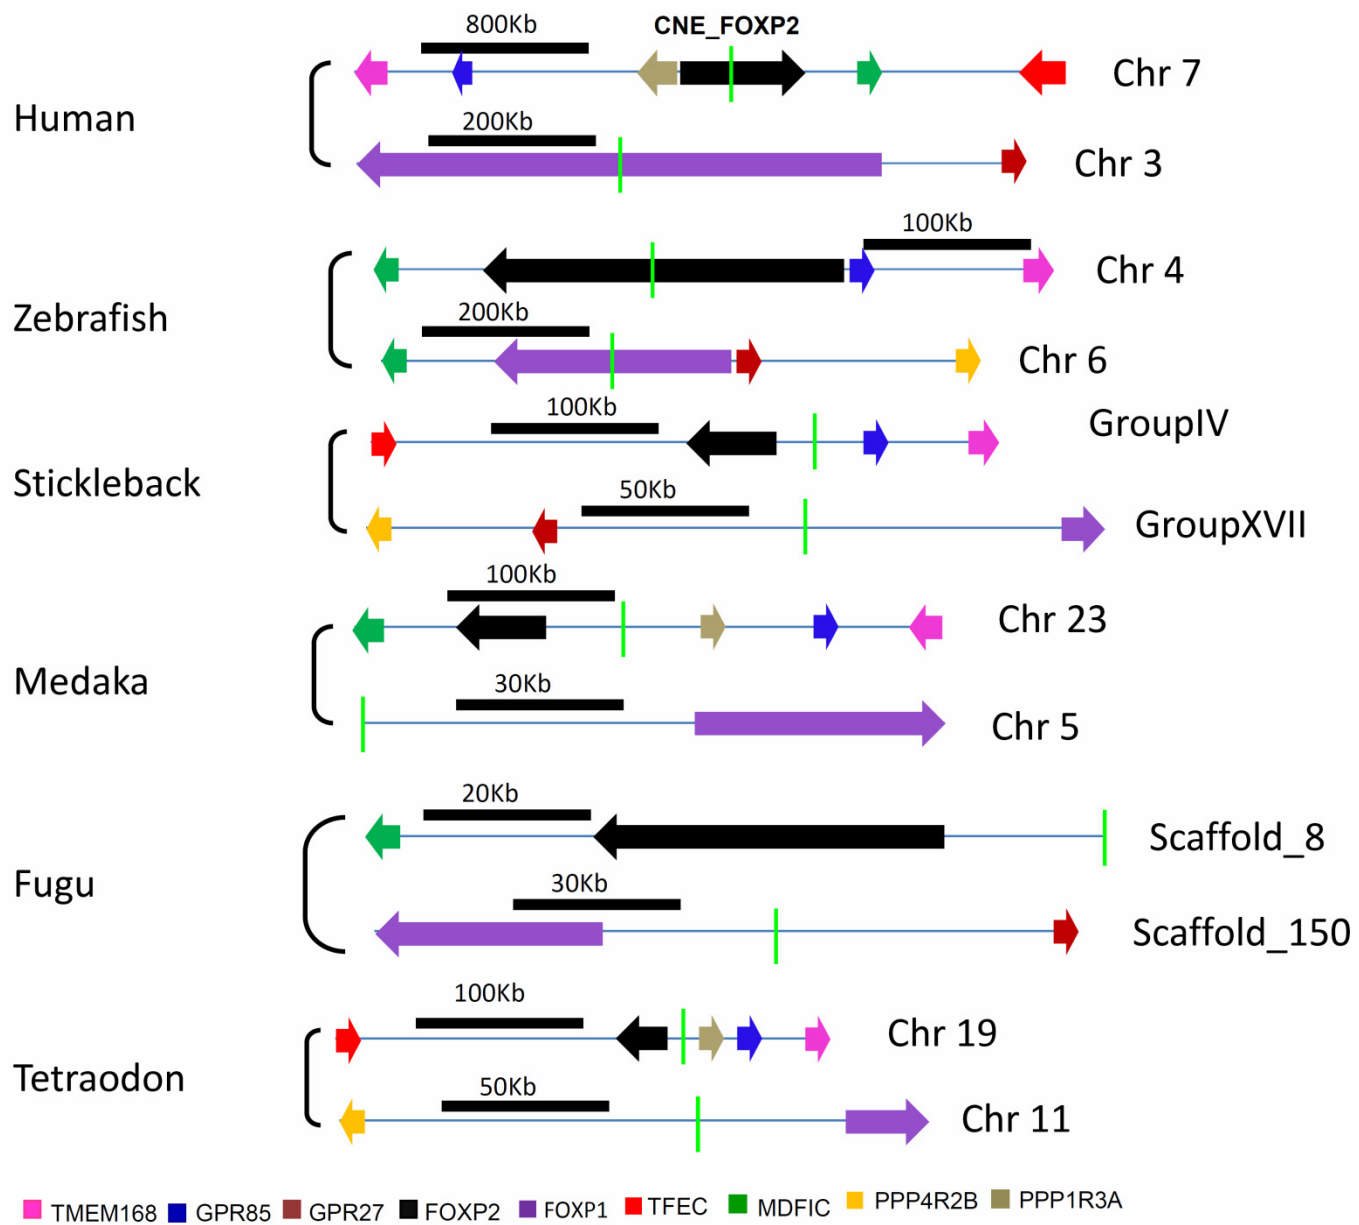

**Figure 72 . Assigning the target genes to CNE-enhancers through comparative genomic analysis (hs218).**

Duplication of human enhancer at the root of vertebrate lineage and preservation of linkage of duplicated enhancers with *FOXP* family members both within and across genomes, unmistakably suggest the specificity of these duplicated cis-regulatory regions (*CNE-FOXP2* and *CNE-FOXP1*) towards *FOXP2* and *FOXP1* promoters.



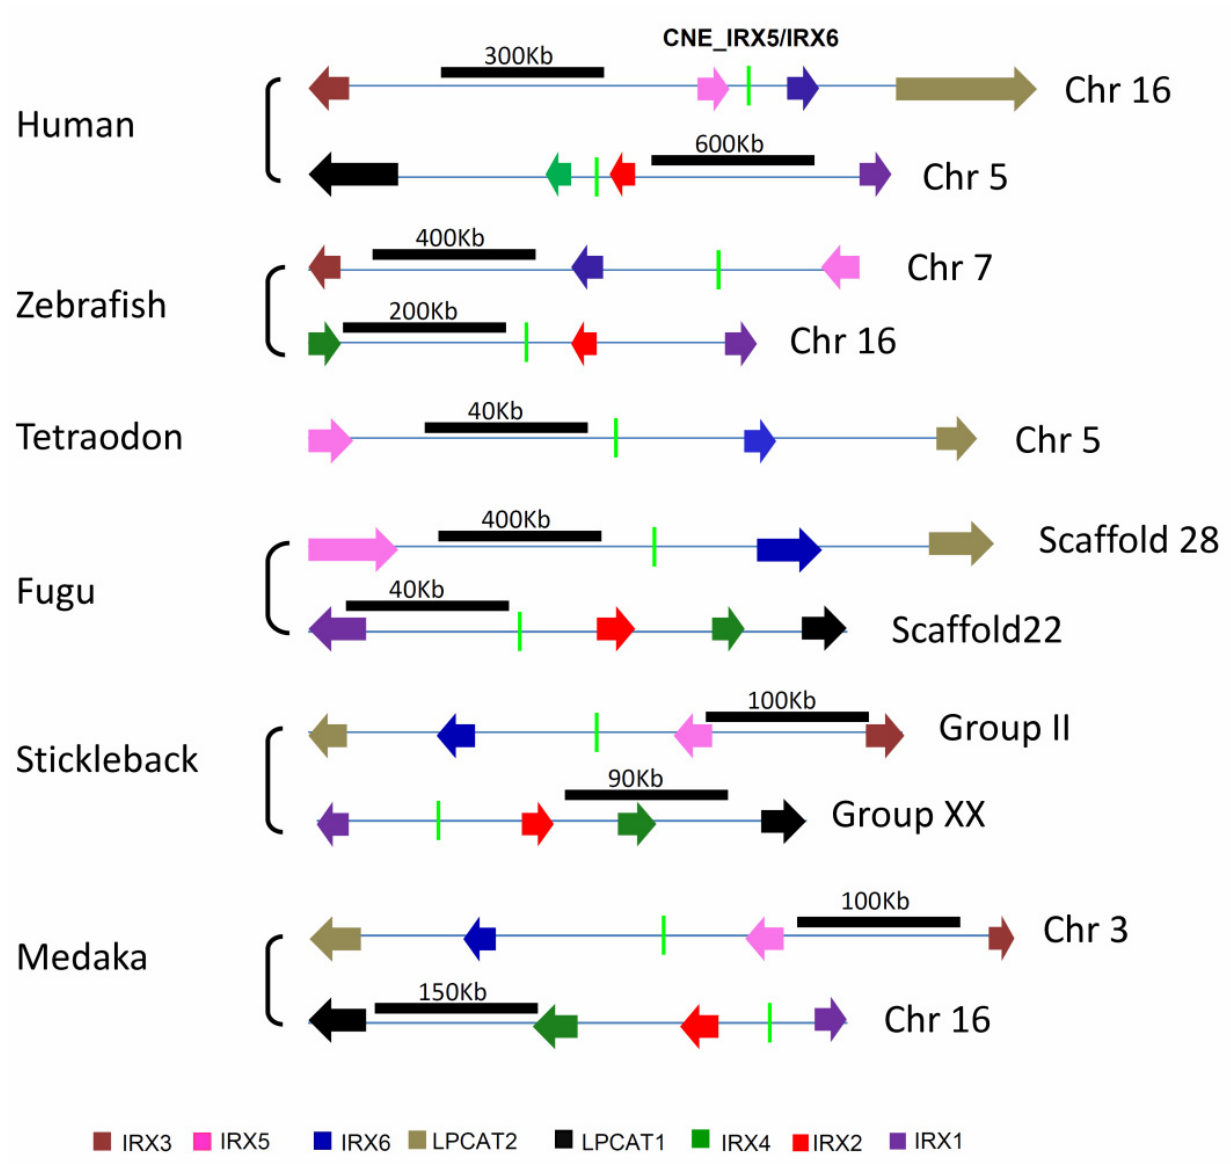

**Figure 73 . Analyzing the genic architecture of human (hs26).**

Human enhancer-target gene duplicated early in vertebrate history, before tetrapod-teleost split. Conserved association between duplicated enhancers and *IRX* paralogs indicate that these duplicated human enhancers (*CNE-IRX5*, *CNE-IRX6* and *CNE-IRX2*, *CNE-IRX4*) are specific to *IRX5*, *IRX6*, *IRX2* and *IRX4* respectively.

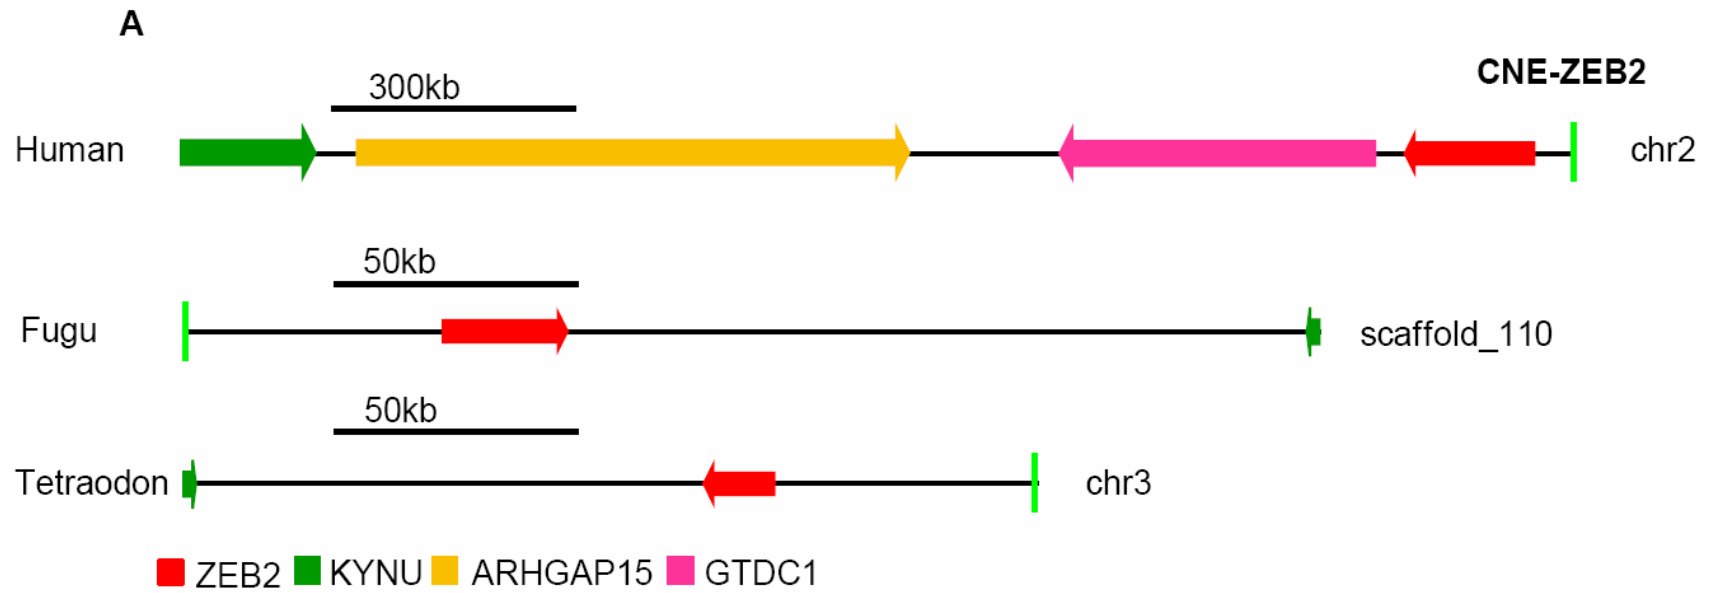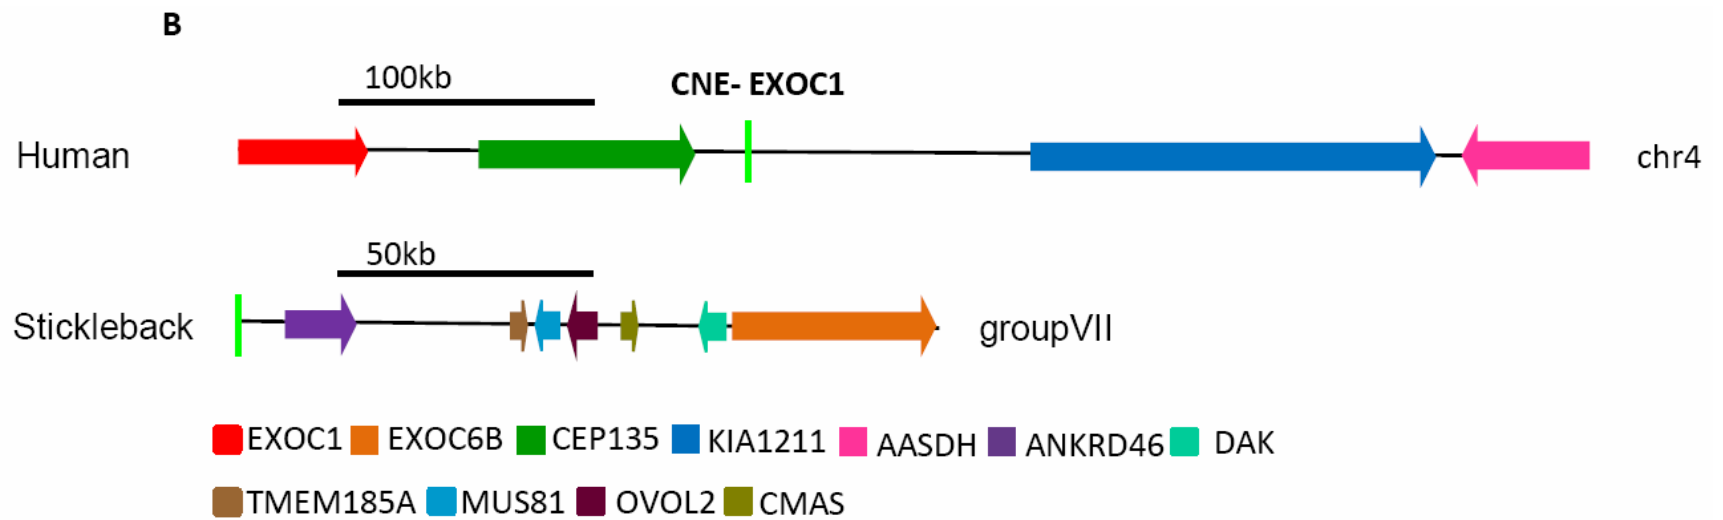

**Figure 74. Analysis of genic environment of human CNE-enhancers in teleost fish orthologous genomic intervals and observing their expression patterns helps in identifying their target genes (hs1802/hs1651).**

Analysis of CNE-enhancers in humans and its orthologous genomic intervals teleost fish lineage helps in associating CNE to their target genes. **(A)** Both synteny analysis and endogenous expression pattern clearly associate the CNE to human *ZEB2* gene. **(B)** CNE-enhancer within an intergenic space between human *CEP135* and *KIA1211* gene is associated with neighboring *EXOC1* gene.

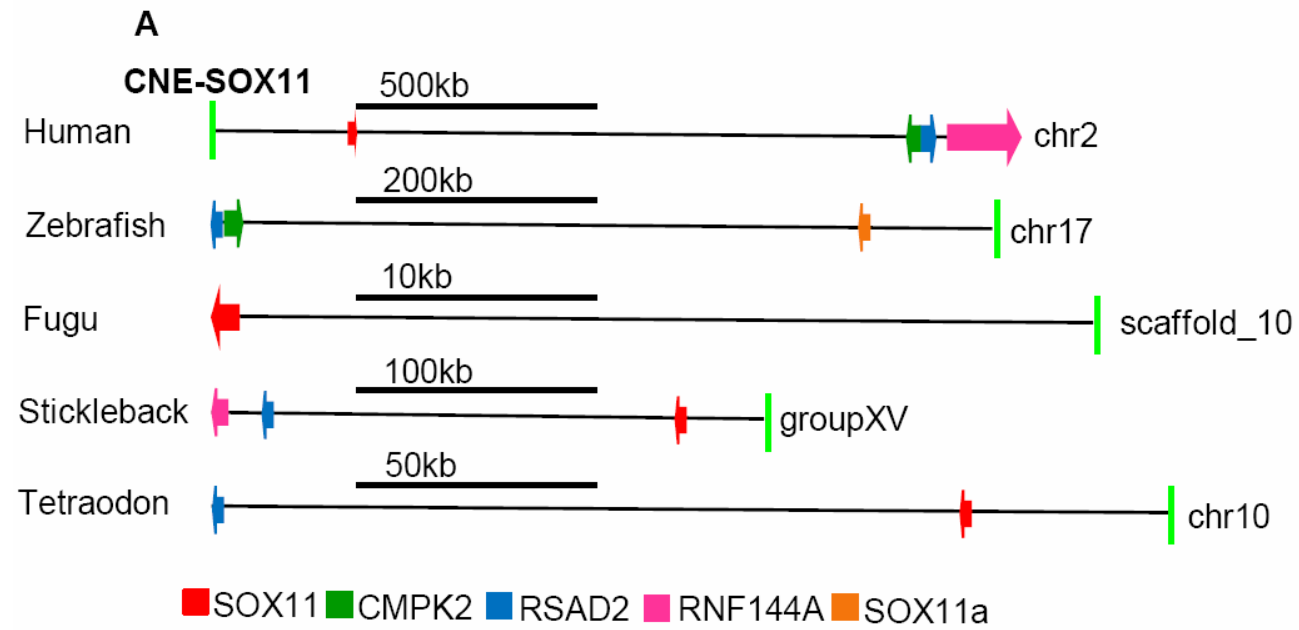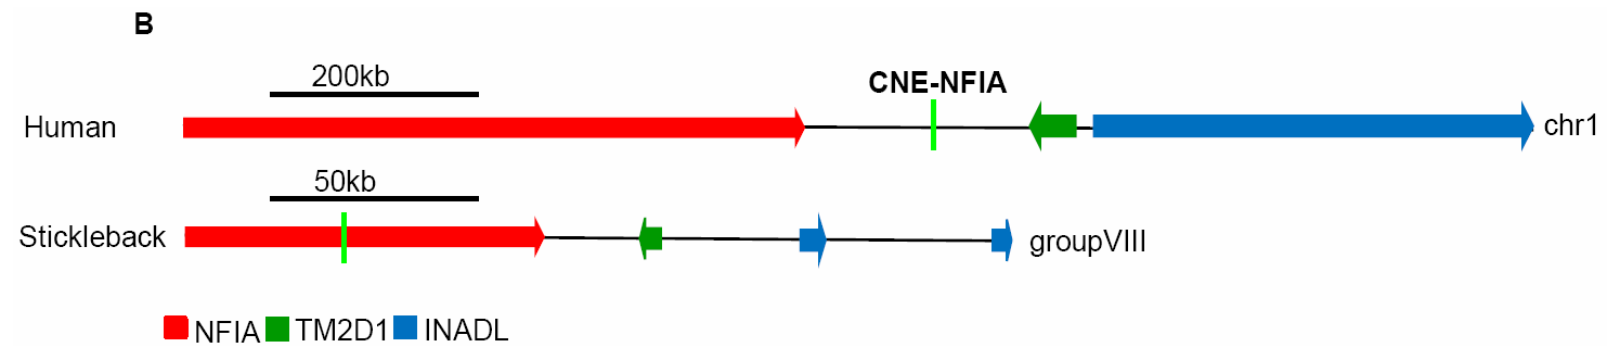

**Figure 75. Analysis of genic environment of human CNE-enhancers in teleost fish orthologous genomic intervals and observing their expression patterns helps in identifying their target genes (hs1496/hs1450).**

Analysis of CNE-enhancers in humans and its orthologous genomic intervals teleost fish lineage helps in associating CNE to their target genes. **(A)** Both synteny analysis and endogenous expression pattern clearly associate the CNE to human *SOX11* gene. **(B)** CNE-enhancer within an intergenic space between human *NFIA* and *TM2DI* is associated with *NFIA* gene.

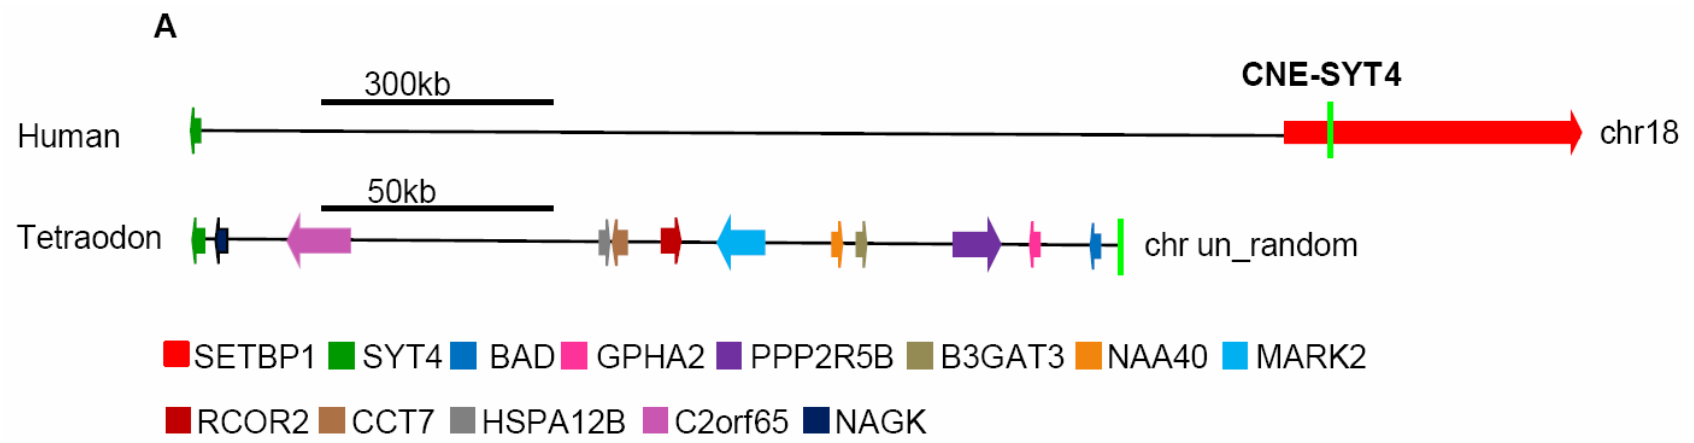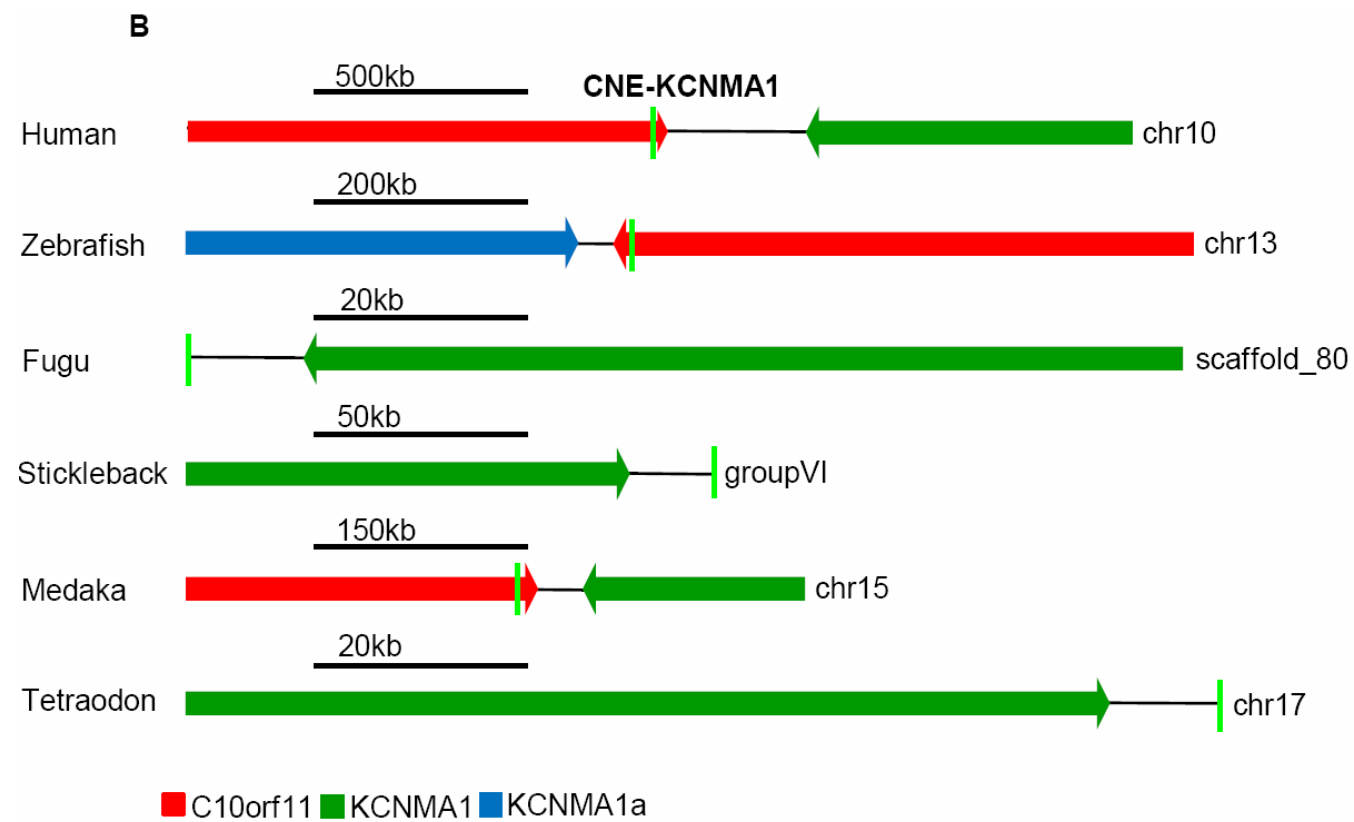

**Figure 76. Analysis of genic environment of human CNE-enhancers in teleost fish orthologous genomic intervals and observing their expression patterns helps in identifying their target genes (hs1362/hs1434).**

Analysis of CNE-enhancers in humans and its orthologous genomic intervals teleost fish lineage helps in associating CNE to their target genes. **(A)** CNE-enhancer within an intron of human *SETBP1* gene is associated with neighboring *SYT4*. **(B)** CNE-enhancer within an intron of human *C10orf11* gene is associated with neighboring *KCNMA1*.



**A**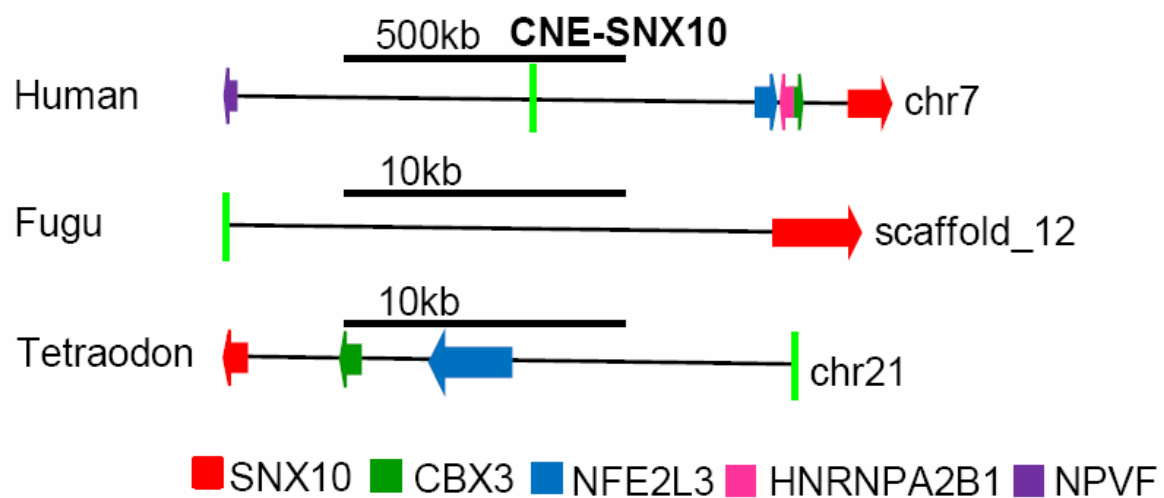**B**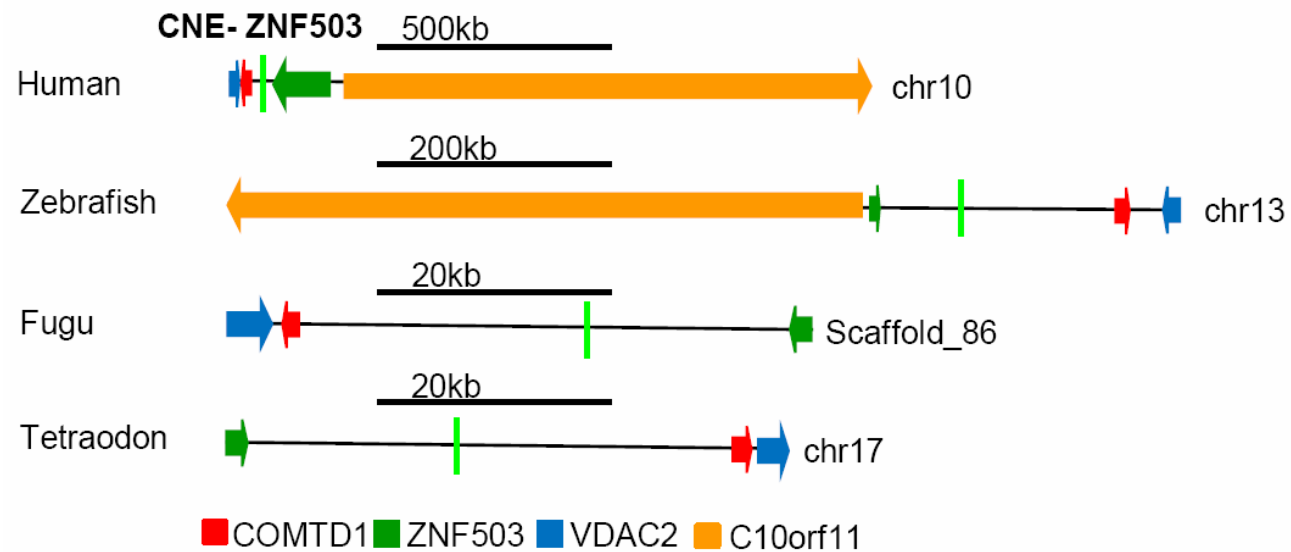

**Figure 77. Analysis of genic environment of human CNE-enhancers in teleost fish orthologous genomic intervals and observing their expression patterns helps in identifying their target genes (hs1325/hs1437).**

Analysis of CNE-enhancers in humans and its orthologous genomic intervals teleost fish lineage helps in associating CNE to their target genes. **(A)** The localization of a human CNE-enhancer in the intergenic space between *NPVF* and *NFE2L3* genes suggests that this enhancer might be associated with one of these genes but not with *SNX10* that is present ~ 104.8 kb downstream of *NFE2L3*. However the careful analysis of genic context of orthologous regions of this element in teleost fish and human clearly associate the CNE to human *SNX10* gene. **(B)** CNE-enhancer within an intergenic space between human *COMTD1* and *ZNF503* genes. Careful analysis of genic context of orthologous regions of this element in teleost fish and human clearly associate the CNE to human *ZNF503*.

**A**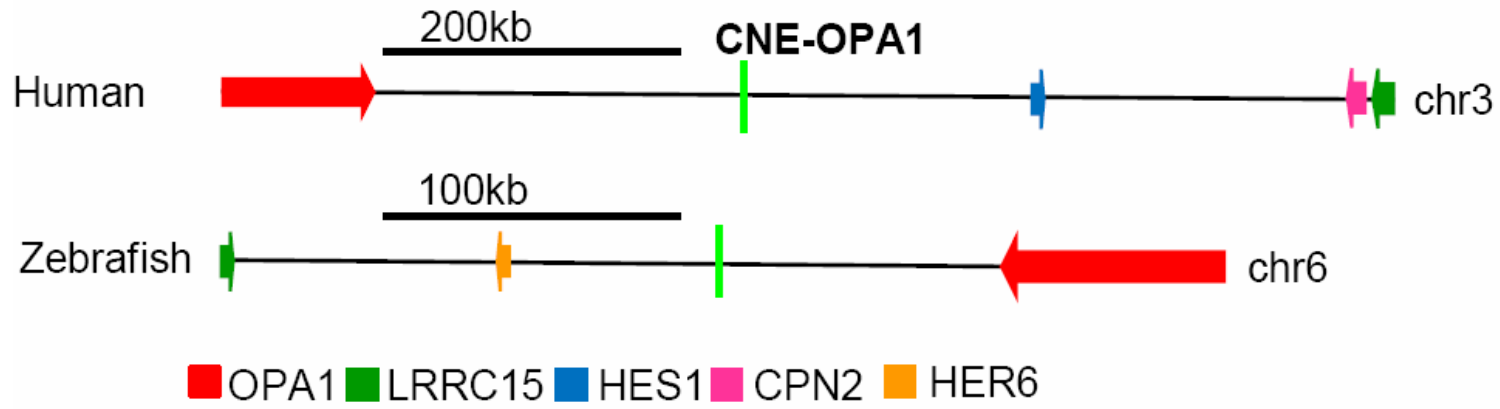**B**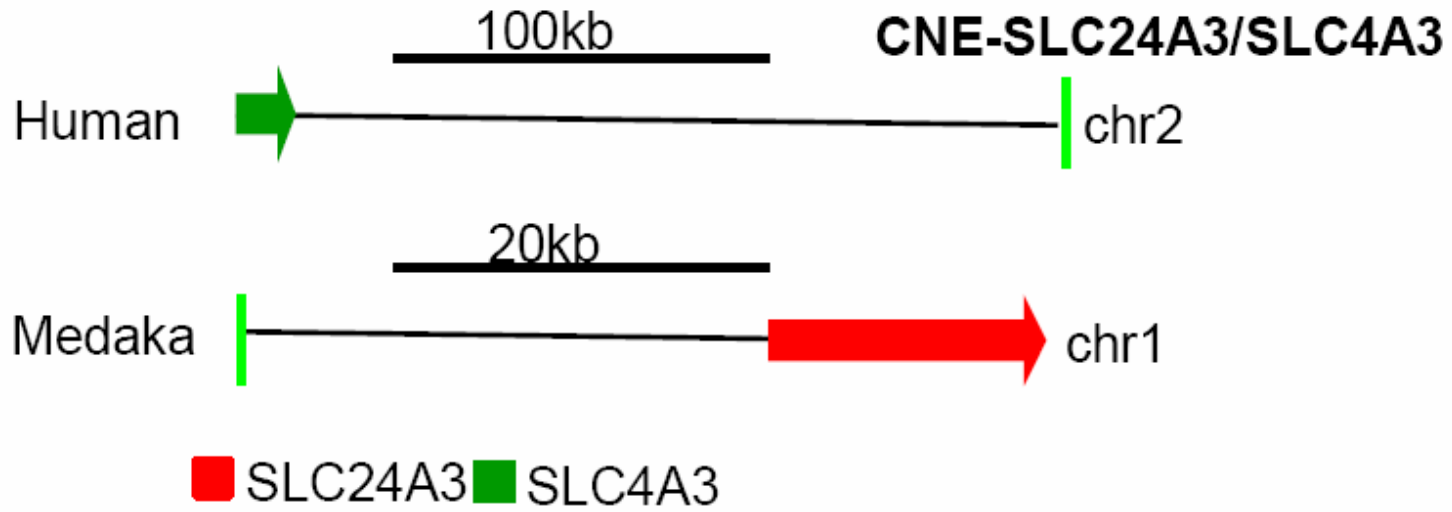

**Figure 78. Analysis of genic environment of human CNE-enhancers in teleost fish orthologous genomic intervals and observing their expression patterns helps in identifying their target genes (hs1344/hs1507).**

Analysis of CNE-enhancers in humans and its orthologous genomic intervals teleost fish lineage helps in associating CNE to their target genes. **(A)** CNE-enhancer within an intergenic space between human *OPAI* and *HES1* is associated with *OPAI*. **(B)** Synteny analysis associate CNE-enhancer to *SLC4A3* gene but its expression pattern is not clearly defined but synteny analysis provides a strong evidence is favor of its association with *SLC4A3* gene.

**A**

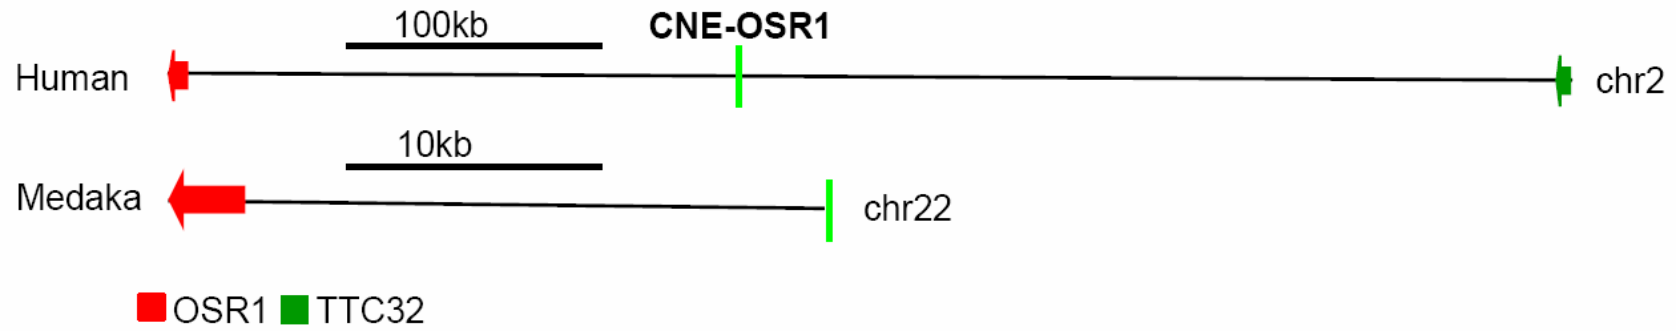

**B**

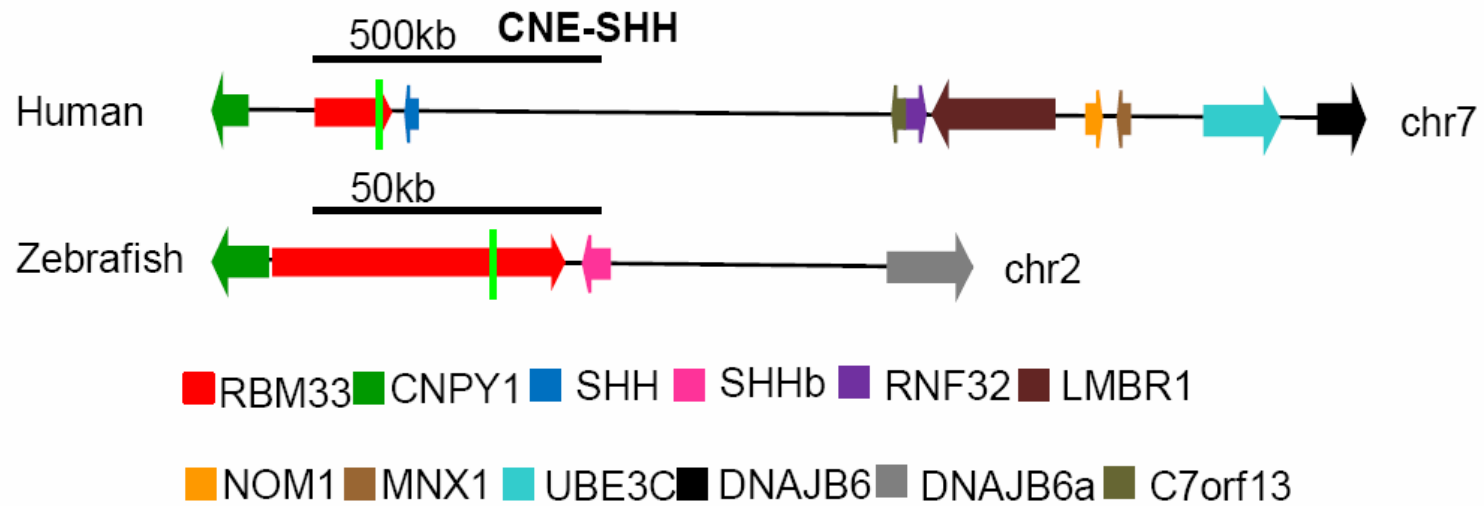

**Figure 79. Analysis of genic environment of human CNE-enhancers in teleost fish orthologous genomic intervals and observing their expression patterns helps in identifying their target genes (hs1273/hs1268).**

Analysis of CNE-enhancers in humans and its orthologous genomic intervals teleost fish lineage helps in associating CNE to their target genes. **(A)** CNE-enhancer within an intergenic space between human *OSRI* and *TTC32* is associated with *OSRI*.

**(B)** CNE-enhancer within an intron of human *RBM33* gene is associated with neighboring *SHH* gene.

**A**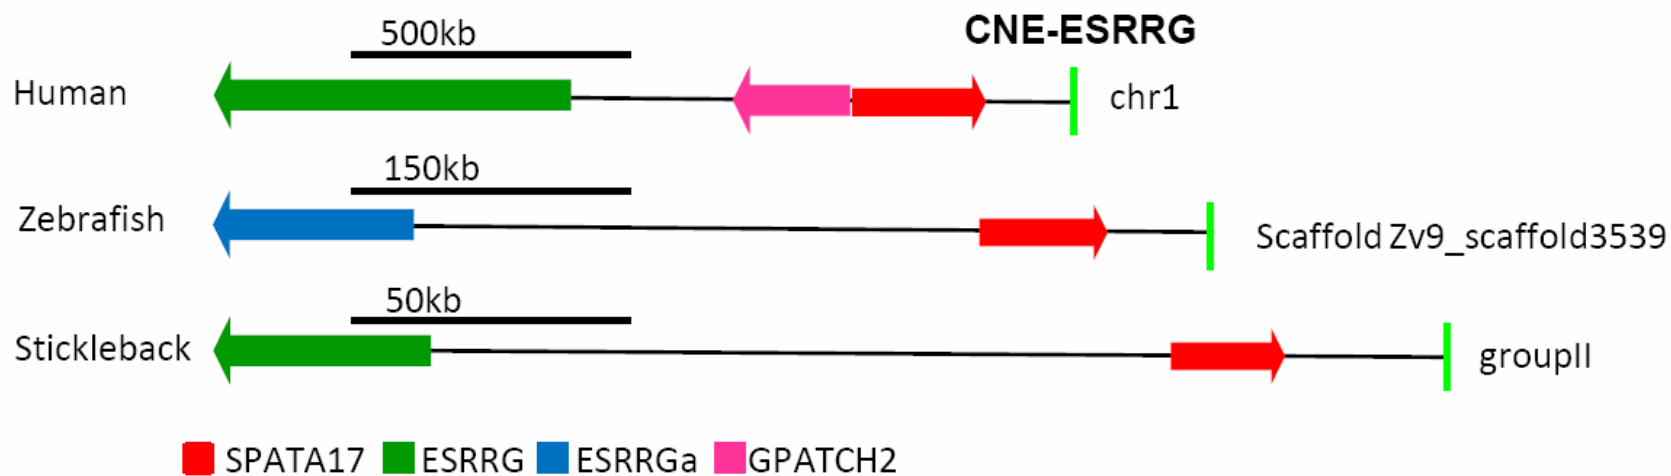**B**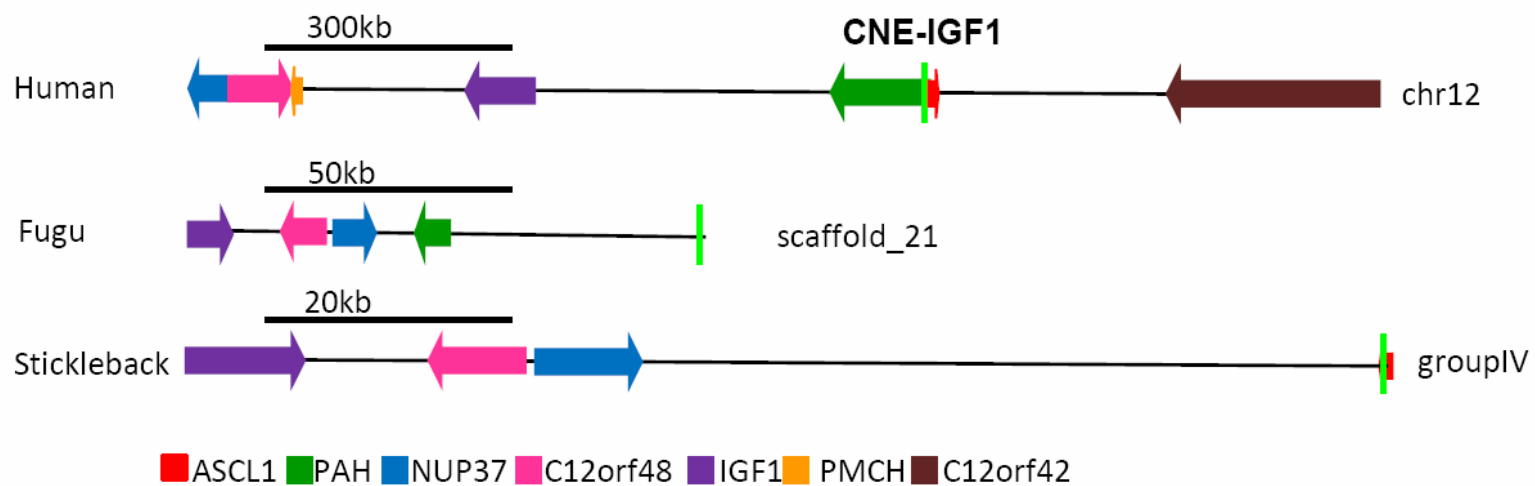

**Figure 80. Analysis of genic environment of human CNE-enhancers in teleost fish orthologous genomic intervals and observing their expression patterns helps in identifying their target genes (hs1257/hs1122).**

Analysis of CNE-enhancers in humans and its orthologous genomic intervals teleost fish lineage helps in associating CNE to their target genes. **(A)** Both synteny analysis and endogenous expression pattern clearly associate the CNE to human *ESRRG* gene. **(B)** Both synteny analysis and endogenous expression pattern clearly associate CNE-enhancer within an intron of human *PAH* gene with neighboring *IGF1* gene.



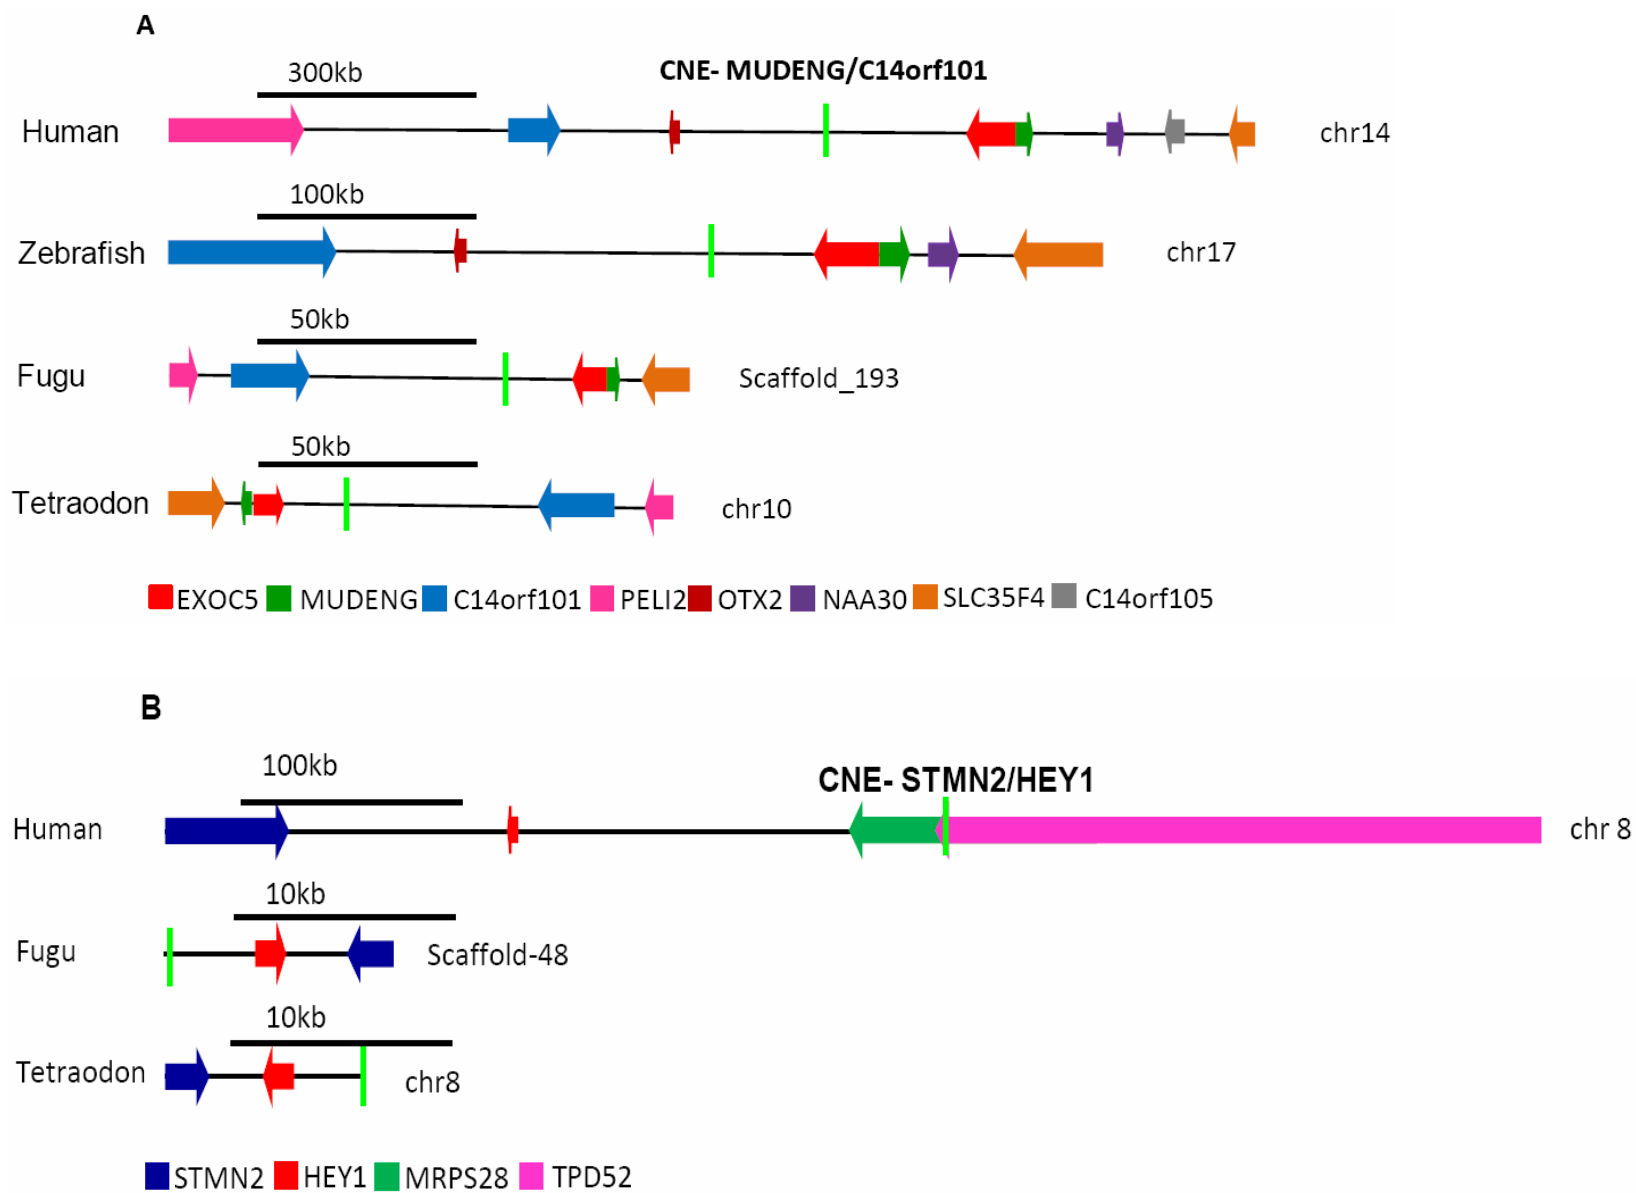

**Figure 81. Analysis of genic environment of human CNE-enhancers in teleost fish orthologous genomic intervals and observing their expression patterns helps in identifying their target genes (hs1791/hs1305).**

Analysis of CNE-enhancers in humans and its orthologous genomic intervals teleost fish lineage helps in associating CNE to their target genes. **(A)** CNE-enhancer is positioned within an intergenic space between human *OTX2* and *EXOC5* on chromosome 14 suggest its association with either of these genes. however the comparative syntenic analysis in fish lineage and expression studies of neighboring conserved genes infers that this CNE might be regulating the expression of downstream *MUDENG* and upstream *c14orf101* gene. **(B)** CNE-enhancer within an intron of human *MRPS28* gene is not associated with the promoter of the same gene, rather comparative syntenic analysis in fish lineage and expression studies of neighboring conserved genes infers that this CNE is acting the at a distance of ~150.8 kb downstream on *HEY1* and *STMN2* genes .

**A**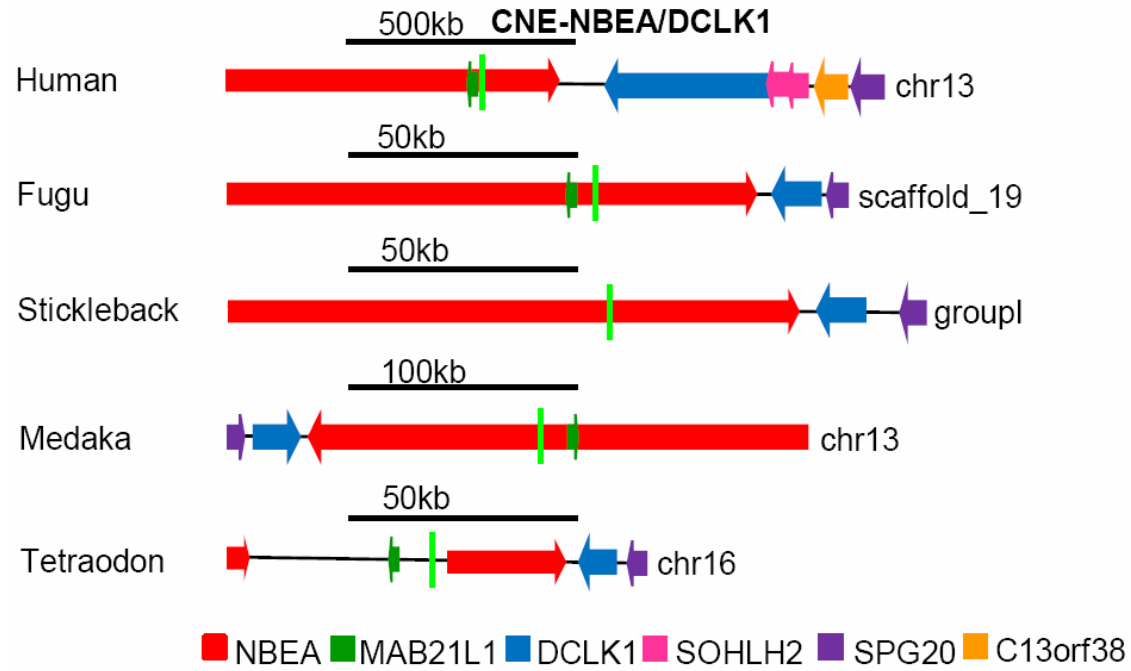**B**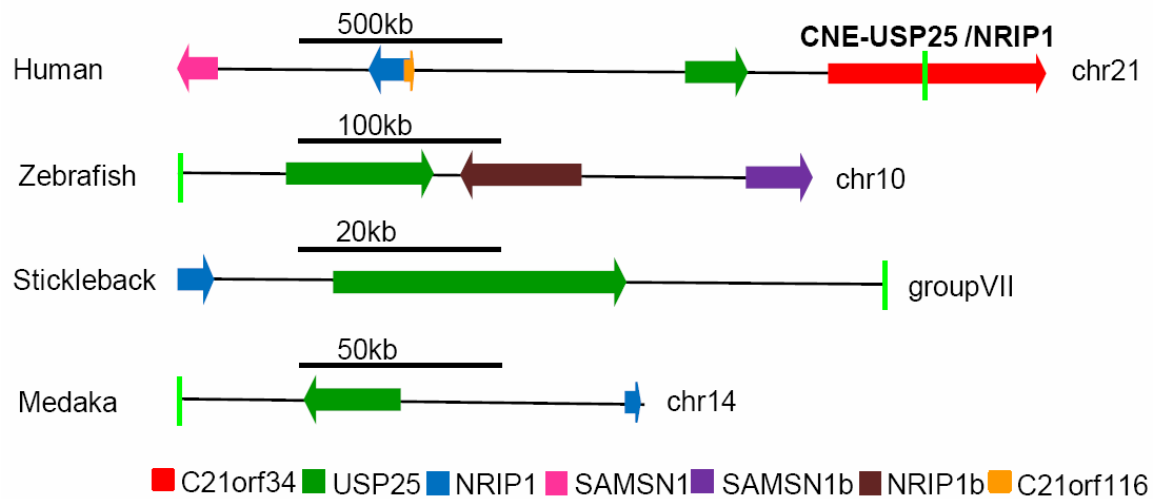

**Figure 82. Analysis of genic environment of human CNE-enhancers in teleost fish orthologous genomic intervals and observing their expression patterns helps in identifying their target genes (hs1333/hs1304).**

Analysis of CNE-enhancers in humans and its orthologous genomic intervals teleost fish lineage helps in associating CNE to their target genes. **(A)** An CNE-enhancer within the intronic region of *NBEA* is conserved in its orthologous intervals in fish lineages, along with downstream *DCLK1* and other bystander genes. However the endogenous expression pattern of *NBEA* and *DCLK1* matches with that of reporter gene expression, clearly inferring the association of enhancer with *NBEA* and downstream *DCLK1* genes. **(B)** The conserved physical location of CNE-enhancer within intronic region of *C10orf34* gene suggest its association with *C10orf34* gene, however the expression studies of neighboring conserved genes infers that this CNE might be regulating the expression of *USP25* and *NRIP1* genes rather than *C10orf34*.

**A**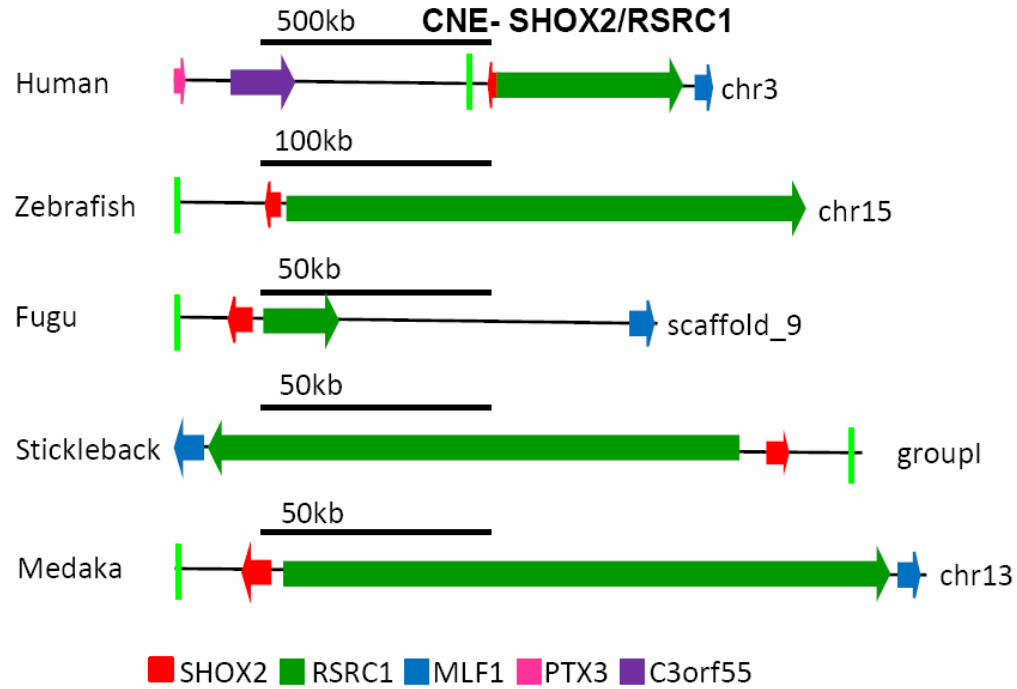**B**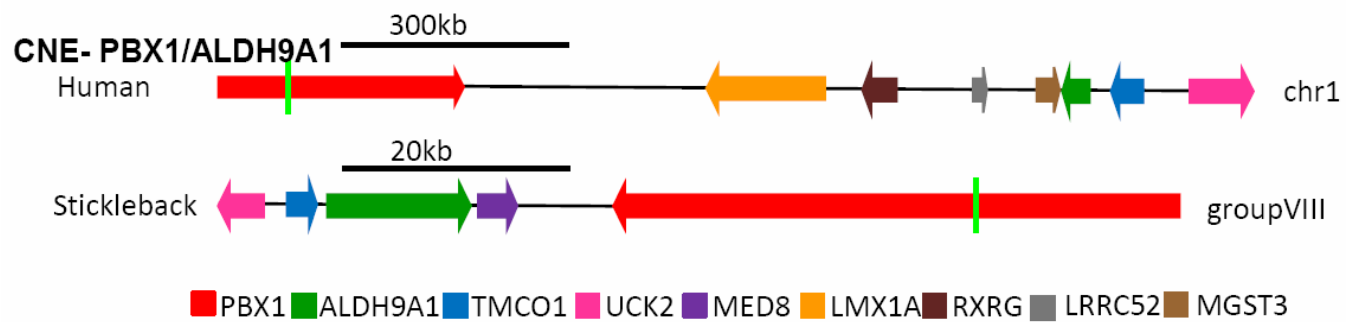

**Figure 83. Analysis of genic environment of human CNE-enhancers in teleost fish orthologous genomic intervals and observing their expression patterns helps in identifying their target genes (hs1251/hs1235).**

Analysis of CNE-enhancers in humans and its orthologous genomic intervals teleost fish lineage helps in associating CNE to their target genes. **(A)** CNE-enhancer is positioned within an intergenic space between human *C3orf55* and *SHOX2* on chromosome 3. Comparative syntenic analysis in fish lineage and expression pattern studies suggest the association of this CNE with *SHOX2* or *RSRC1*. **(B)** The CNE-enhancer located within intronic region of *PBX1* in human and some fish lineages is conserved along *ALDH9A1* and other bystander genes. The comparative syntenic analysis of human locus with multiple fish lineages suggest its association with *PBX1* and *ALDH9A1*, moreover expression pattern studies also favors this association.

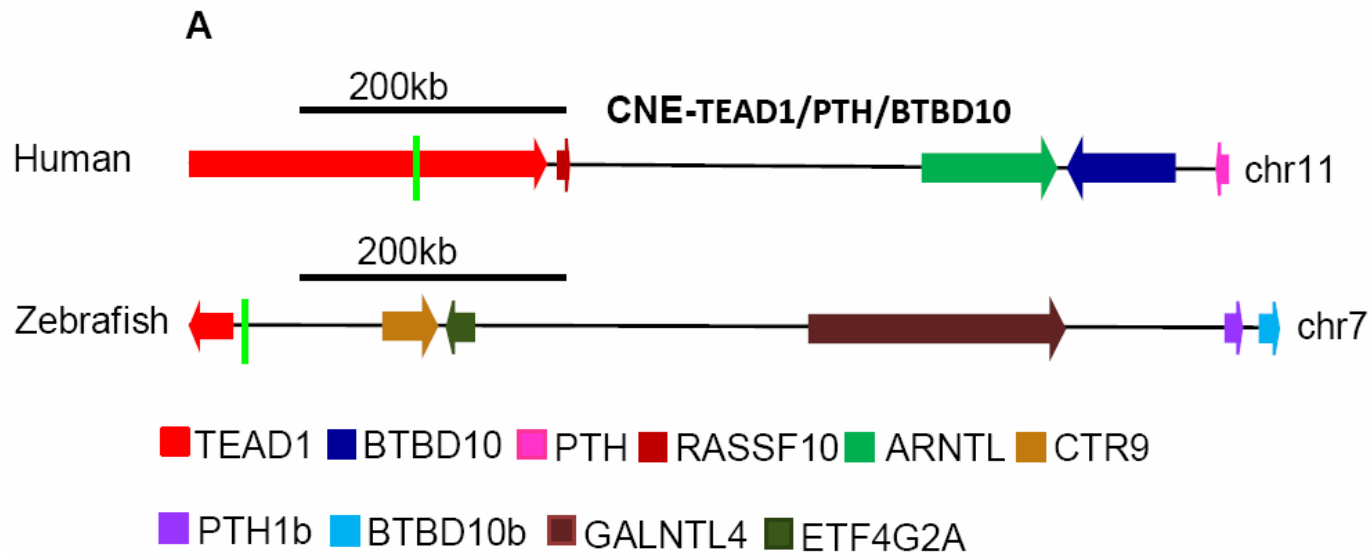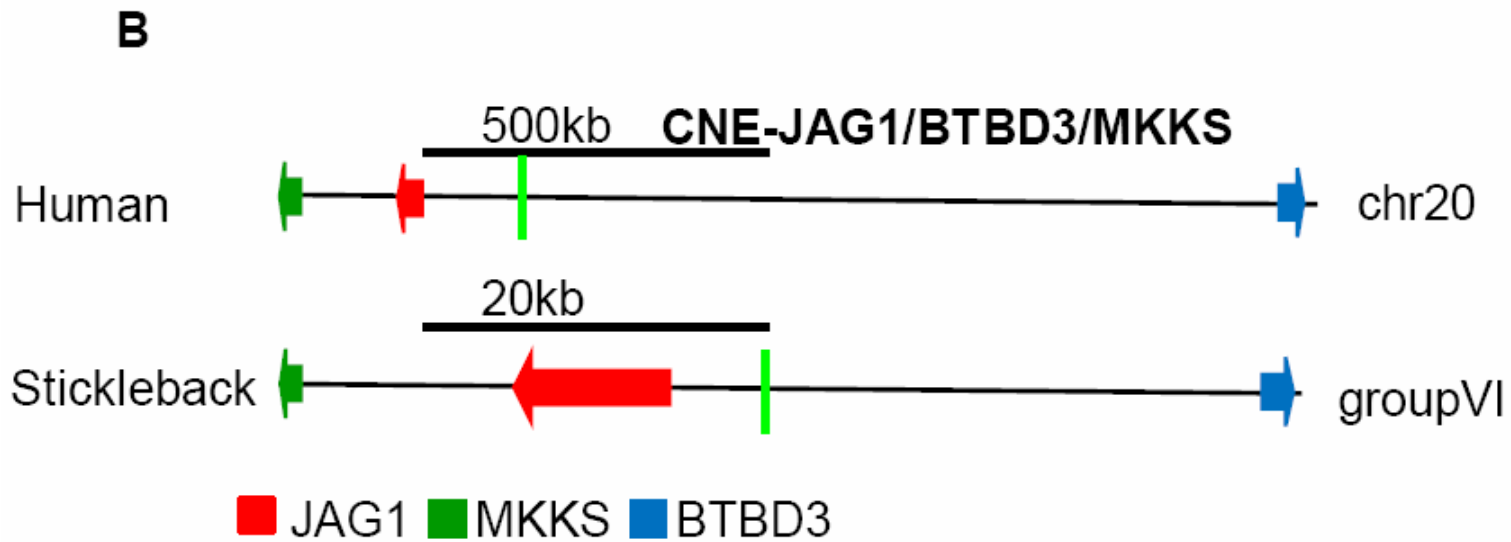

**Figure 84. Analysis of genic environment of human CNE-enhancers in teleost fish orthologous genomic intervals and observing their expression patterns helps in identifying their target genes (hs1314/hs1278).**

Analysis of CNE-enhancers in humans and its orthologous genomic intervals teleost fish lineage helps in associating CNE to their target genes. **(A)** The physical location of human CNE enhancer within the intronic region of *TEAD1* is conserved in its orthologous intervals in fish lineages, along with *PTH* and *BTBD10* genes. However the endogenous expression pattern is clearly inferring the association of enhancer with *TEAD1*, *PTH* and *BTBD10*. **(B)** An intergenic CNE-enhancer showed conserved positioning with respect to *JAG1* and *BTBD3* along with *MKKS* genes in human and teleost fish lineages. The expression pattern of these genes is highly redundant and in accordance with CNE-enhancer induced reporter expression, and suggests that this enhancer might be influencing the expression of all of these genes .



**A**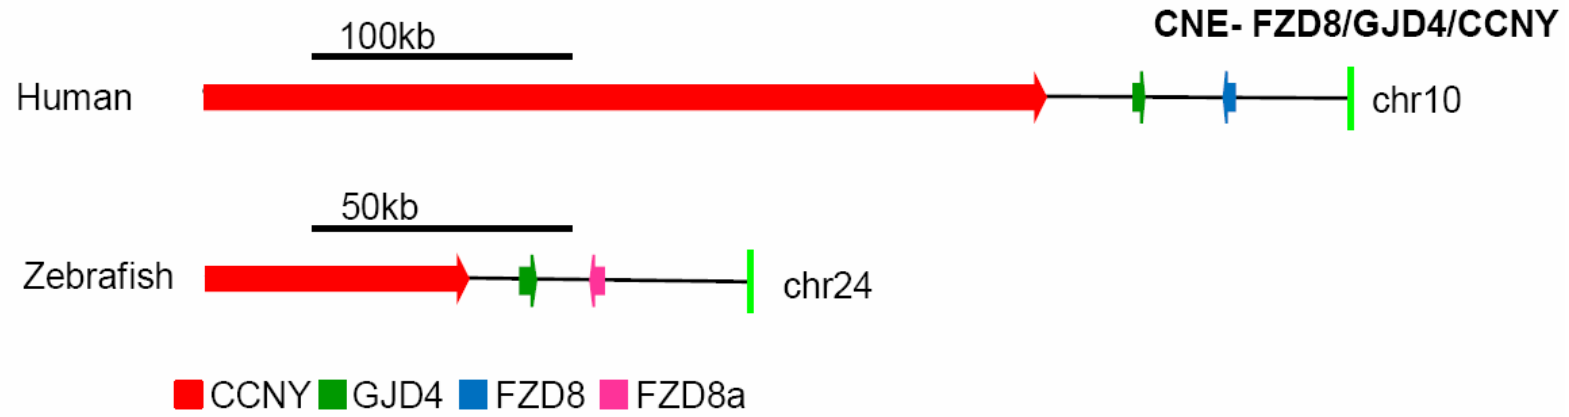**B**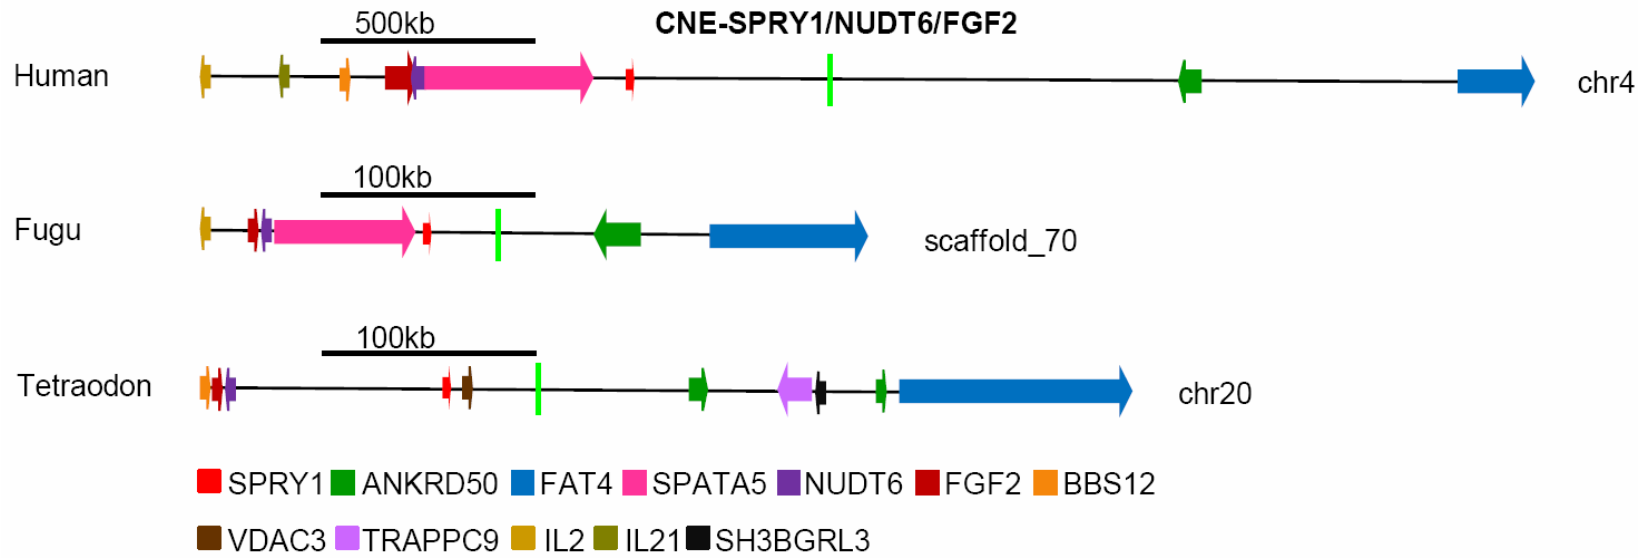

**Figure 85. Analysis of genic environment of human CNE-enhancers in teleost fish orthologous genomic intervals and observing their expression patterns helps in identifying their target genes (hs1567/hs1525).**

Analysis of CNE-enhancers in humans and its orthologous genomic intervals teleost fish lineage helps in associating CNE to their target genes. **(A)** Analyzing the expression pattern and conservation in fish lineage shows that CNE-enhancer is regulating the expression of *FZD8, GJD4, CCNY*. **(B)** Analyzing the expression pattern and conservation in fish lineage shows that human CNE-enhancer positioned in the intergenic space between human *SPRY1* and *ANKRD50* gene is regulating the expression of flanking *SPRY1* and downstream *NUDT6* and *FGF2* genes.

**A**

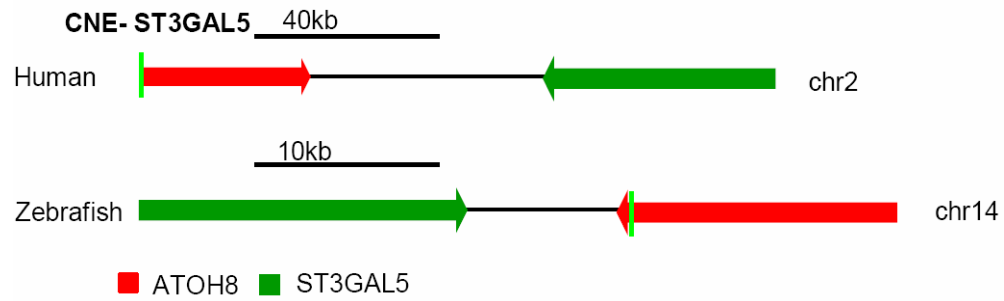

**B**

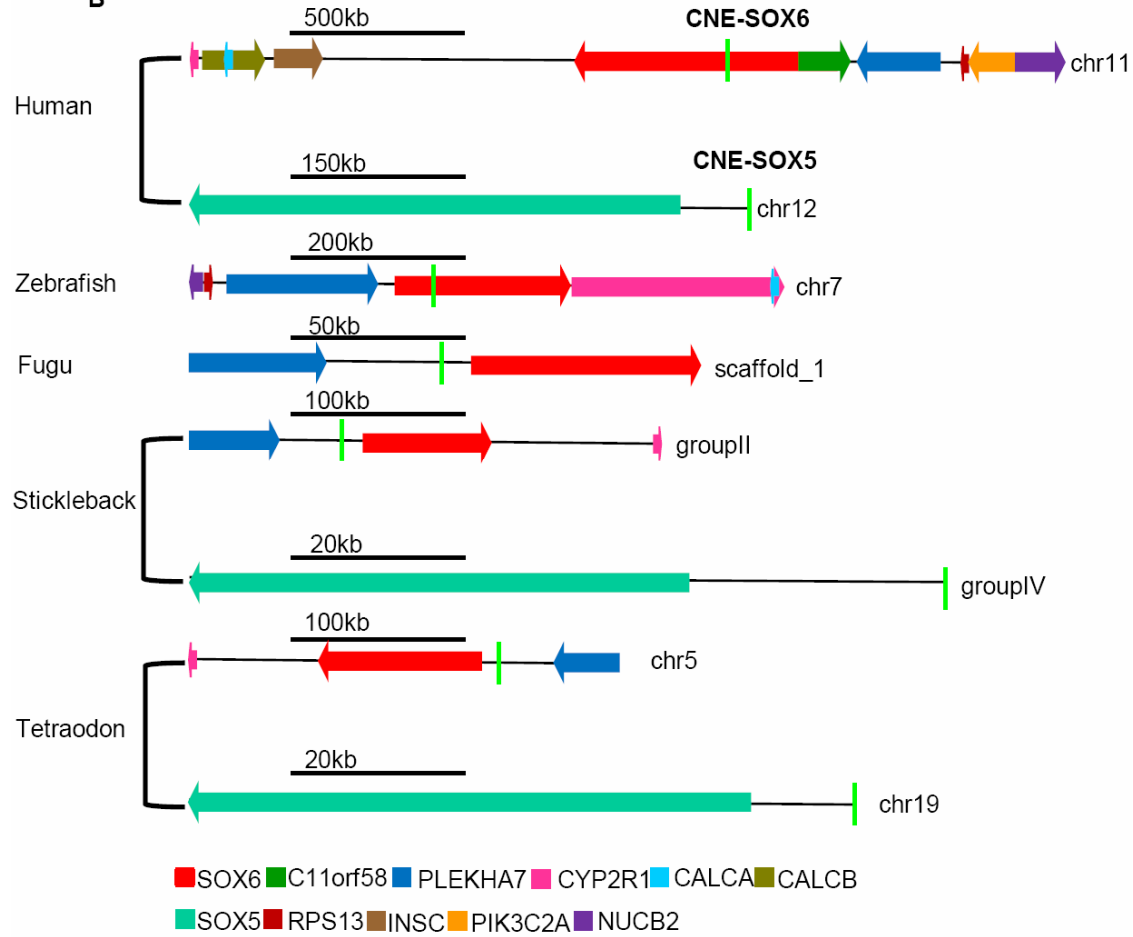

**Figure 86. Analysis of genic environment of human CNE-enhancers in teleost fish orthologous genomic intervals and observing their expression patterns helps in identifying their target genes (hs1652/hs1301).**

Analysis of CNE-enhancers in humans and its orthologous genomic intervals teleost fish lineage helps in associating CNE to their target genes. **(A)** The conserved physical location of CNE-enhancer within intronic region of *ATOH8* in fish and human lineages suggest its association with *ATOH8* gene, however the expression studies of neighboring conserved genes infers that this CNE might be regulating the expression of *ST3GAL5* rather than *ATOH8*. **(B)** Human CNE-enhancer and target gene duplicated before tetrapod-teleost divergence. Comparative syntenic analysis of human duplicated loci in multiple fish lineages clearly suggest that these duplicated human enhancers are associated with the regulation of human *SOX* paralogs(*SOX6,SOX5*) residing on human chromosome 11 and 12.

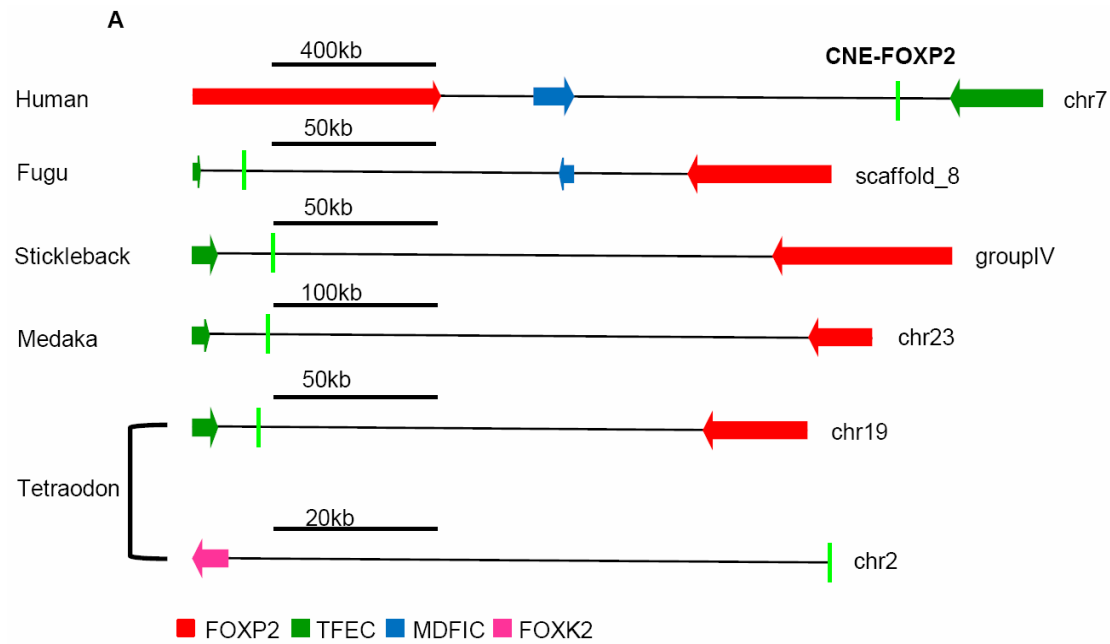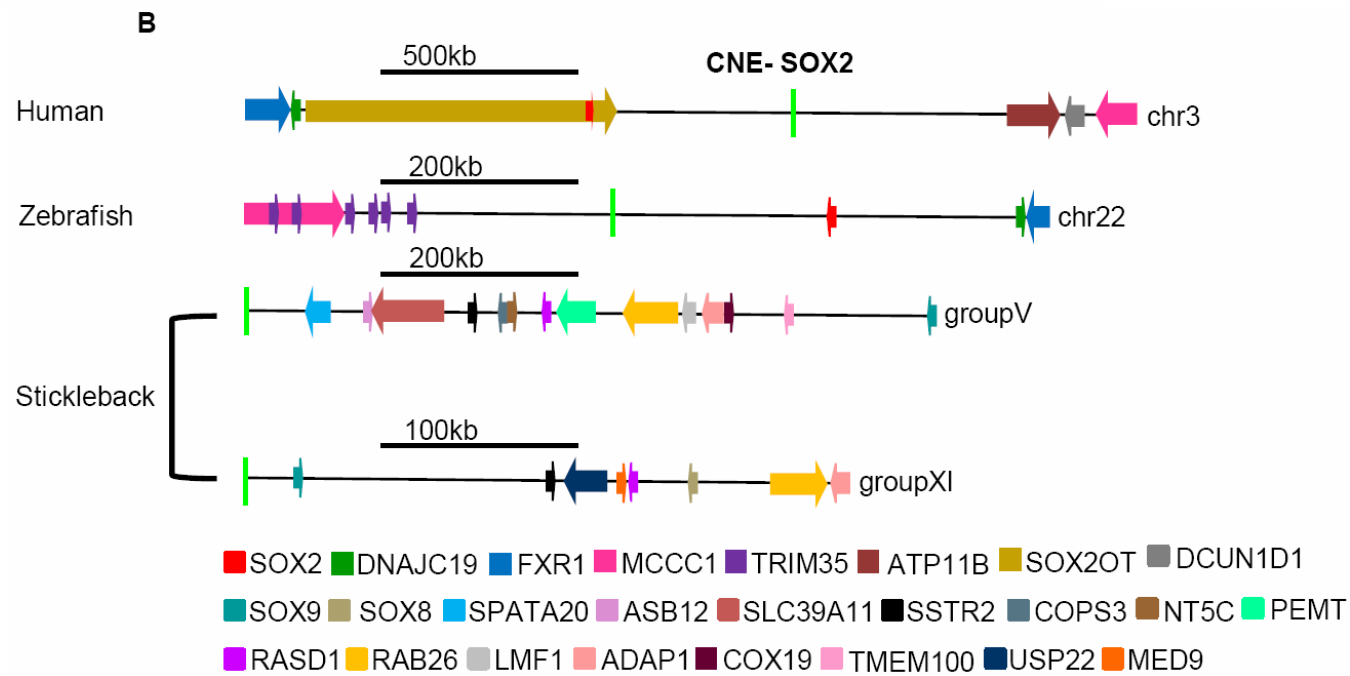

**Figure 87. Analysis of genic environment of human CNE-enhancers in teleost fish orthologous genomic intervals and observing their expression patterns helps in identifying their target genes (hs1798/hs1332).**

Analysis of CNE-enhancers in humans and its orthologous genomic intervals teleost fish lineage helps in associating CNE to their target genes. **(A)** Human cis-regulatory element positioned in the intergenic space between *MDFIC* and *TFEC*, suggesting that this enhancer might be associated with one of these genes but not with *FOXP2* that is present ~ 1.11 Mb upstream of *MDFIC*. However the careful analysis of genic context of orthologous regions of this element in teleost fish and its duplicated paralogous copy on Tetraodon chromosome 2 clearly indicates that the only gene in the human locus that preserved its association with this CNE-enhancer in all teleost fish analyzed (even in duplicated loci of tetraodon) is *FOXP2*. Therefore this human enhancer is unambiguously associated with the regulation of human *FOXP2* gene. **(B)** CNE-enhancer within an intergenic space between *SOX2OT* and *ATP11B* genes, suggesting that this enhancer might be associated with one of these genes but careful analysis of genic context of orthologous regions of this element in teleost fish and its duplicated paralogous (*SOX9,SOX8*) in Stickleback clearly indicates that the only gene in the human locus that preserved its association with this CNE-enhancer in all teleost fish analyzed (even in duplicated loci of Stickleback) is *SOX2* within intron of human *SOX2OT* gene. Therefore this human enhancer is unambiguously associated with the regulation of human *SOX2* gene.

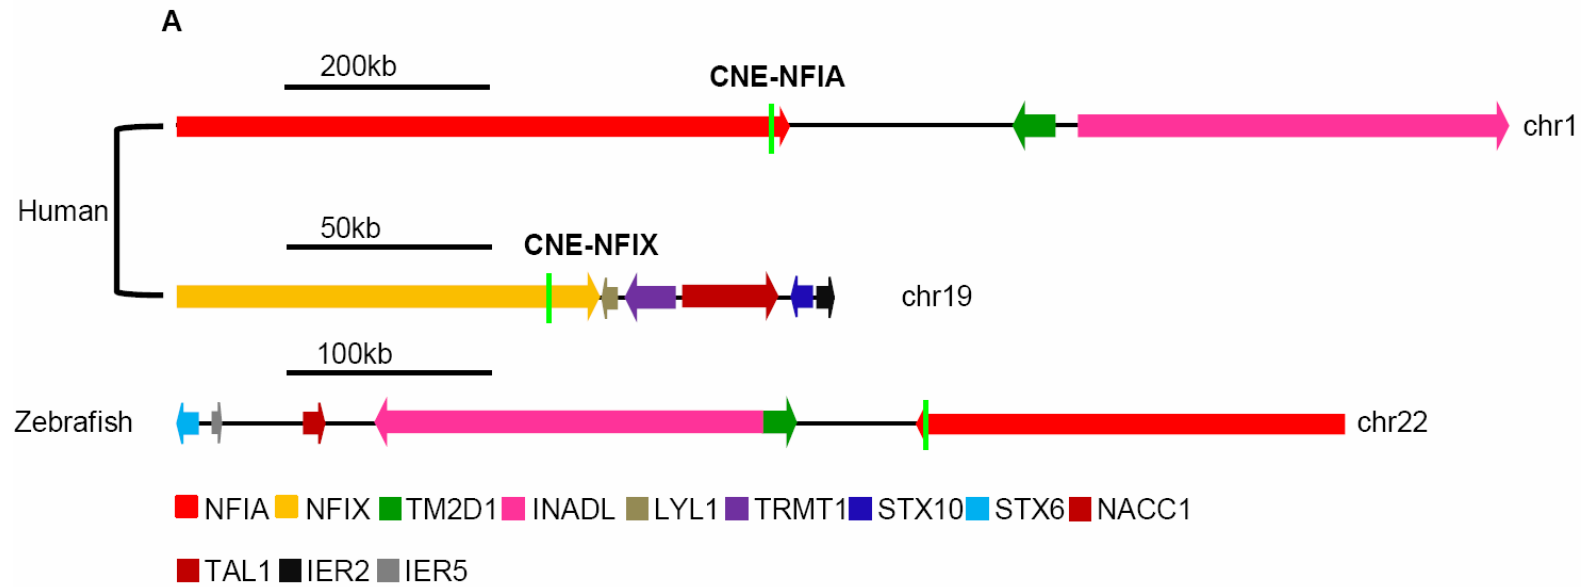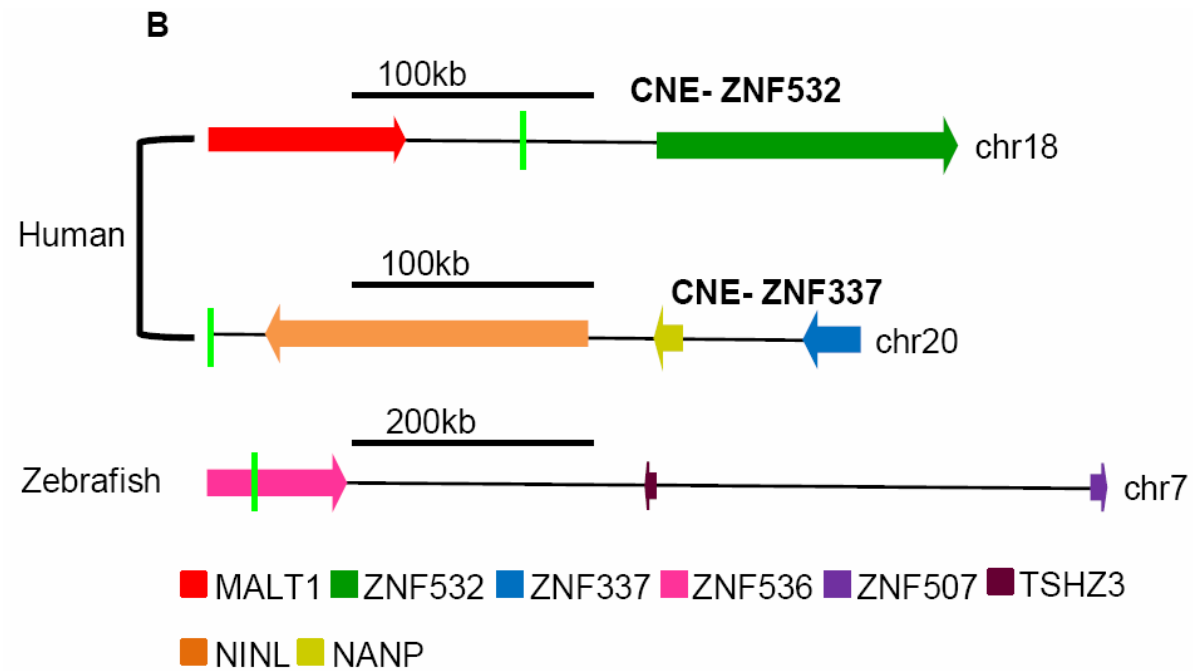

**Figure 88. Analysis of genic environment of human CNE-enhancers in teleost fish orthologous genomic intervals and observing their expression patterns helps in identifying their target genes (hs1309/hs1397).**

Analysis of CNE-enhancers in humans and its orthologous genomic intervals teleost fish lineage helps in associating CNE to their target genes. **(A)** Human CNE-enhancer duplicated in human lineage is positioned within the intronic interval of *NFIA* gene on chromosome 1. Careful analysis of genic context of orthologous regions of this element in teleost fish and its duplicated paralogous copy on human chromosome suggests the association of this enhancer with *NFIA* gene. **(B)** Duplicated human CNE enhancer within an intergenic space between *MALT1* and *ZNF532* is associated with either of these genes where as careful analysis of genic context of orthologous regions of this element in teleost fish reveal that it is associated with *ZNF532*.



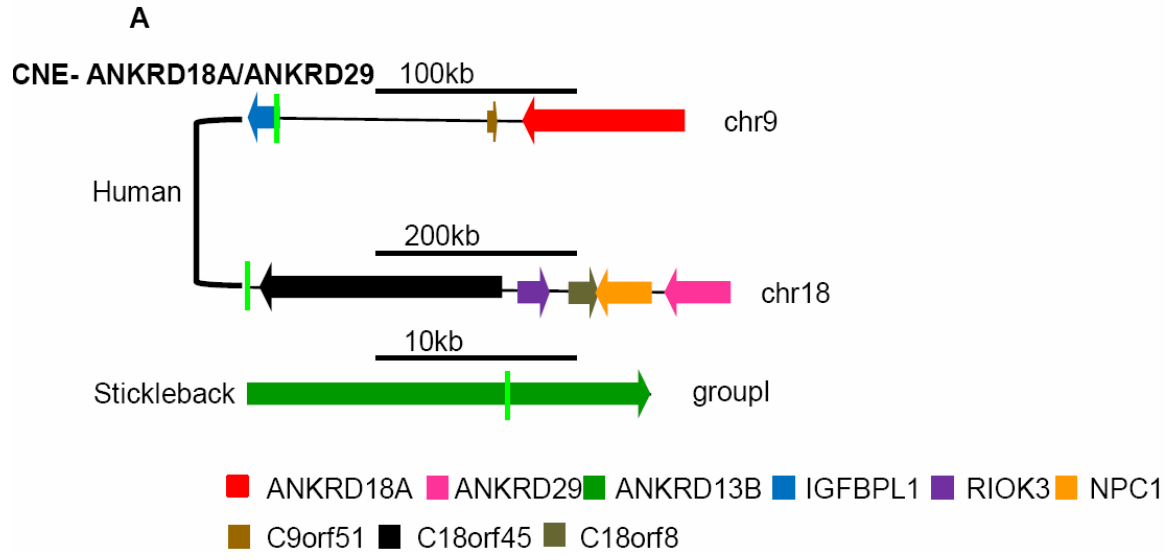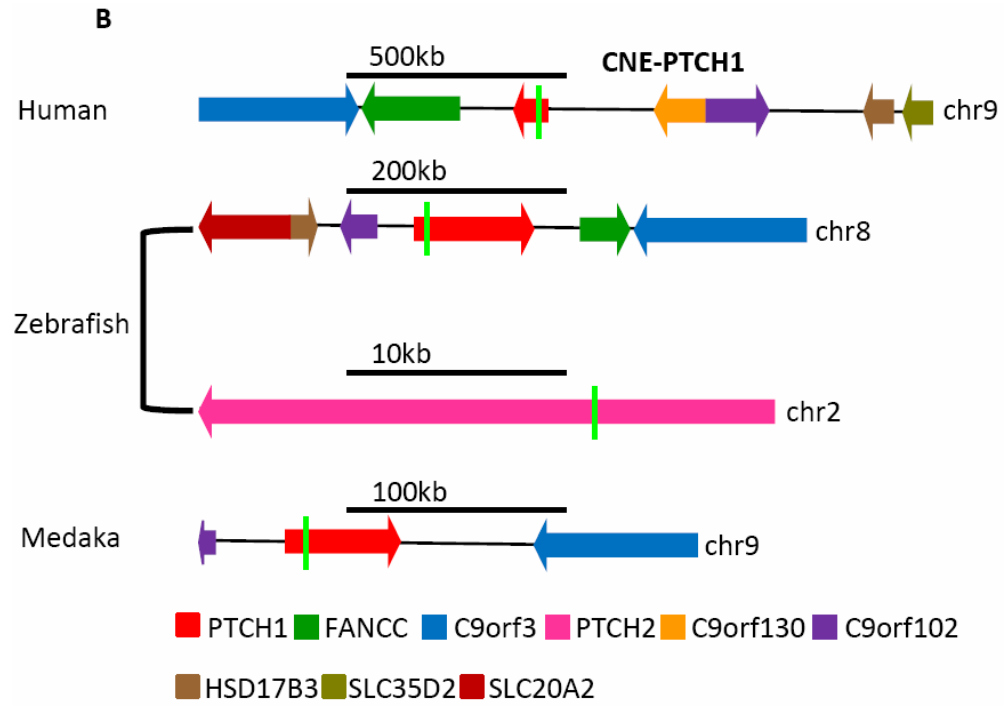

**Figure 89. Analysis of genic environment of human CNE-enhancers in teleost fish orthologous genomic intervals and observing their expression patterns helps in identifying their target genes (hs1390/hs1258).**

Analysis of CNE-enhancers in humans and its orthologous genomic intervals teleost fish lineage helps in associating CNE to their target genes. **(A)** CNE-enhancer within an intron of human *IGFBPL1* gene is duplicated in Human .Comparative syntenic analysis of this locus revealed that genomic interval encompassing this conserved enhancer in all lineages links this CNE with the regulation of neighboring *ANKRD18A* & *ANKRD29* gene. Although its expression pattern is not clearly defined but syntenic analysis provide a strong evidence in favor of its association with *ANKRD18A* & *ANKRD29* gene. **(B)** Human CNE-enhancer is positioned within the intronic interval of *PTCHI* gene. Comparative analysis of this locus in teleost fish revealed that genomic interval encompassing this conserved enhancer is duplicated in zebrafish (*PTCH1,PTCH2*). The conserved linkage of CNE with *PTCHI* in all lineages and its endogenous expression unmistakably links this CNE with the regulation of *PTCHI* gene.

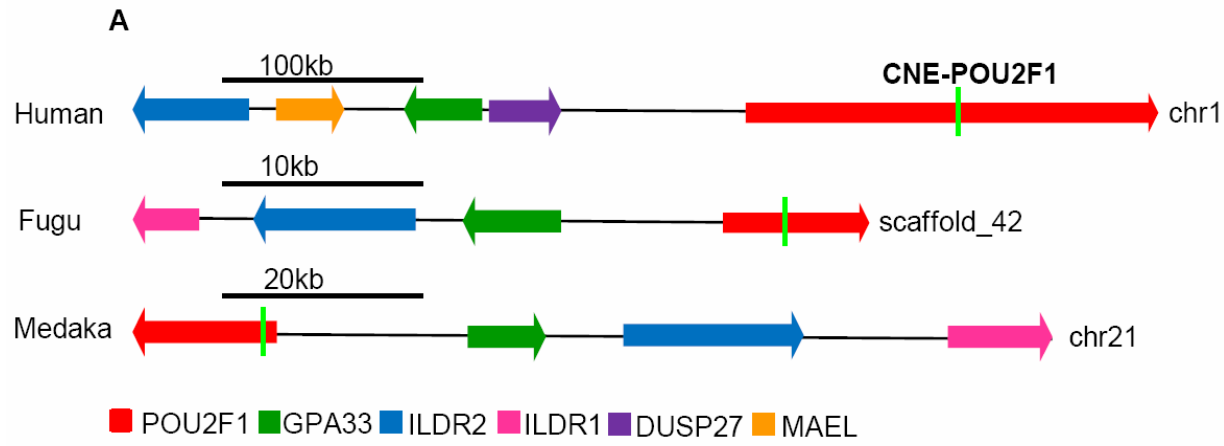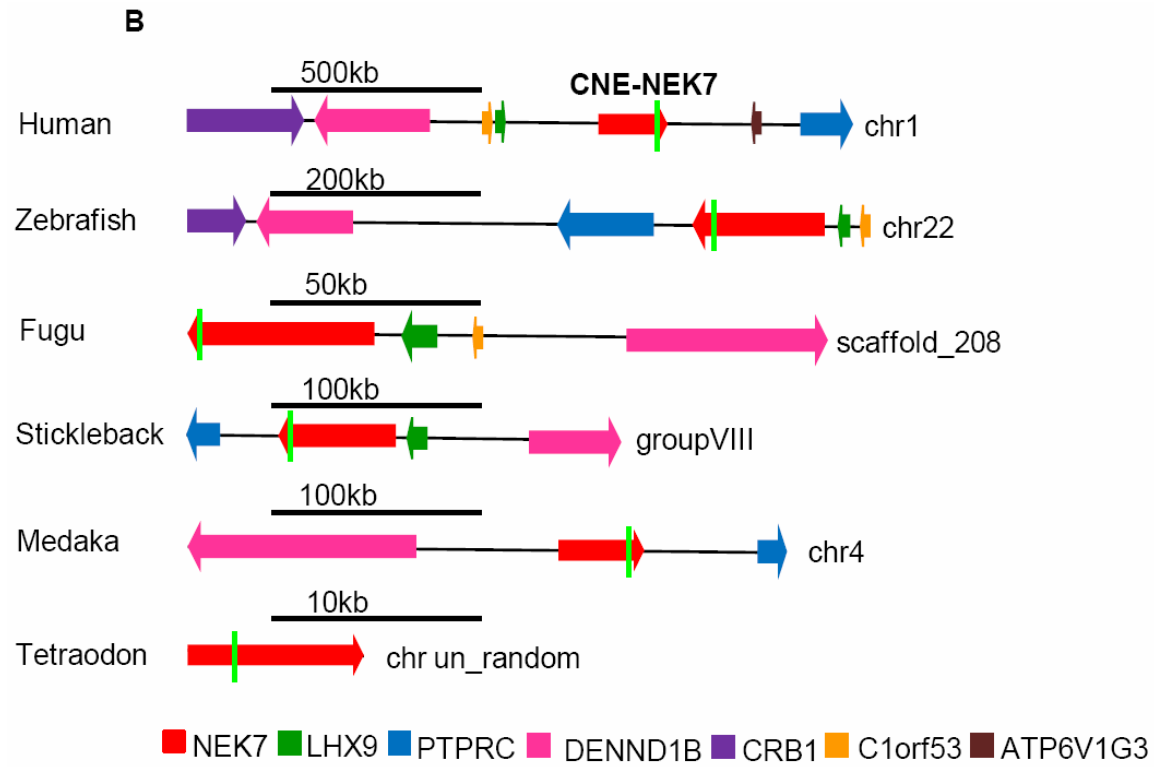

**Figure 90. Analysis of genic environment of human CNE-enhancers in teleost fish orthologous genomic intervals and observing their expression patterns helps in identifying their target genes (hs1331/hs1322).**

Analysis of CNE-enhancers in humans and its orthologous genomic intervals teleost fish lineage helps in associating CNE to their target genes. **(A)** CNE-enhancer within an intron of human *POU2F1* gene is associated with the promoter of the same gene. Other human-fish conserved genes within this locus appeared to be bystanders as their expression pattern is unrelated to the activity of this cis-acting region. **(B)** CNE-enhancer within an intron of human *NEK7* gene is associated with the promoter of the same gene. Other human-fish conserved genes within this locus appeared to be bystanders as their expression pattern is unrelated to the activity of this cis-acting region.

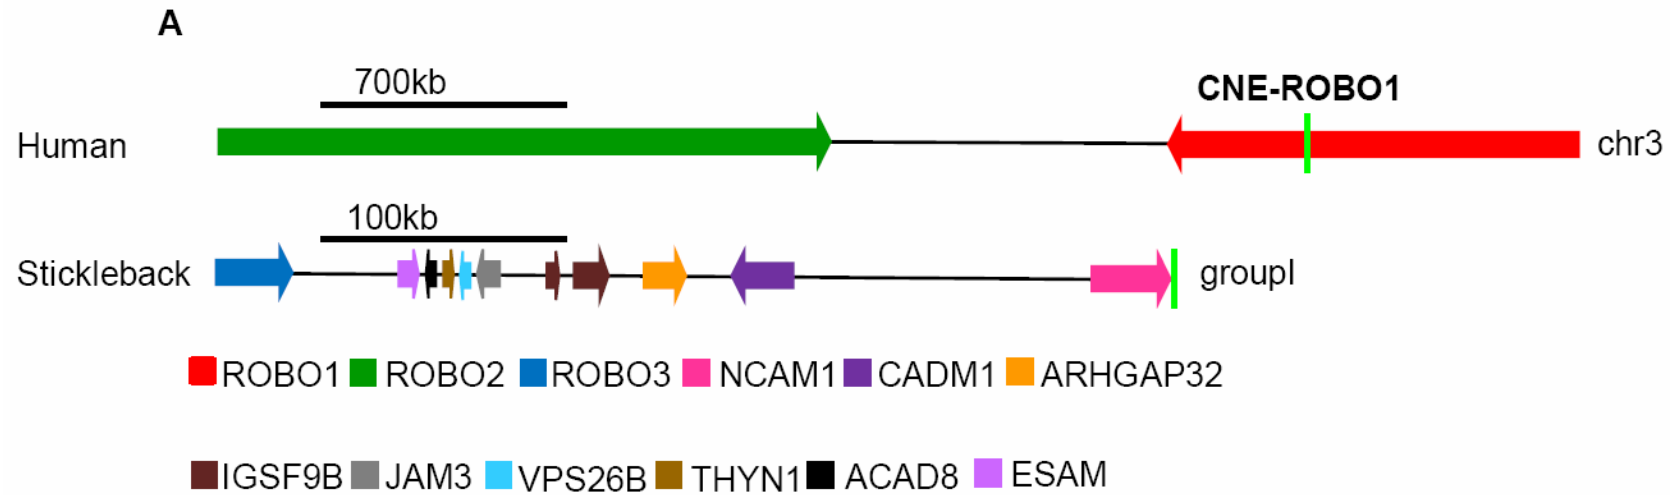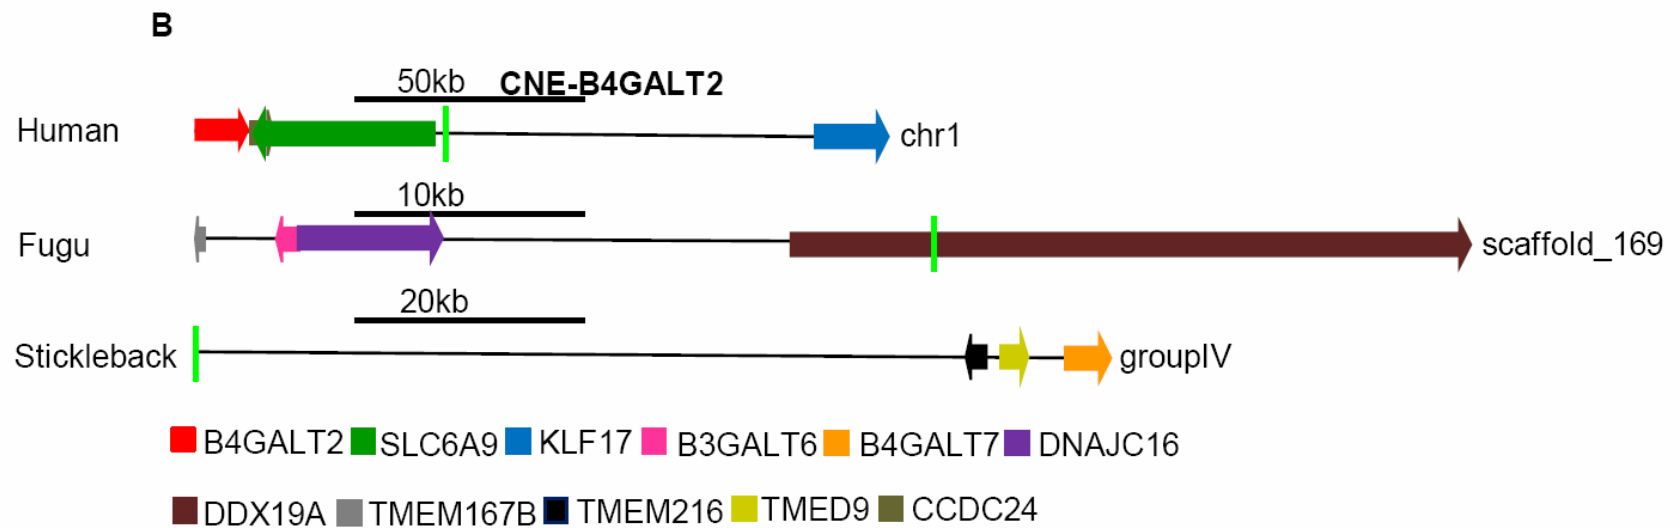

**Figure 91. Analysis of genic environment of human CNE-enhancers in teleost fish orthologous genomic intervals and observing their expression patterns helps in identifying their target genes (hs1475/hs1857).**

Analysis of CNE-enhancers in humans and its orthologous genomic intervals teleost fish lineage helps in associating CNE to their target genes. **(A)** CNE-enhancer within an intron of human *ROBO1* gene is associated with the promoter of same gene. **(B)** CNE-enhancer within an intergenic space between human *SLC6A9* and *KLF17* gene is associated with neighboring *B4GALT2* gene.
